# Supplementary material for: Identification of the Lipid Oxygen Radical Defense pathway and its epigenetic control
Source: Research Square preprint supplement (doi:10.21203/rs.3.rs-6339649/v1), 2025-05-28
Supplement: Supplementary file 1 [file de45d0075a88f7dc1657571a.xlsx]

## Sheet: DE_ZNF354A_vs_Ctle
ensembl	entrez	symbol	genename	mean.ZNF354A	mean.Ctle	foldChange	padj	diffExpr	ZNF354A_peaks
ENSG00000271858	11068	CYB561D2	cytochrome b561 family member D2	1.718	4.29995	-2.50288	0.184201	No	645000
ENSG00000223701	100652739	RAET1E-AS1	RAET1E antisense RNA 1	1.00402	2.36488	-2.35542	0.285926	No	41951
ENSG00000143248	8490	RGS5	regulator of G protein signaling 5	1143.63	2679.96	-2.34338	4.55785e-13	Yes	456557
ENSG00000268592	100652739	RAET1E-AS1	RAET1E antisense RNA 1	16.146	35.7795	-2.21599	0.0010488	Yes	29875
ENSG00000236756	414245	DNAJC9-AS1	DNAJC9 and MRPS16 antisense RNA 1	10.8461	22.5882	-2.08261	0.00878033	Yes	708362
ENSG00000255508	64852	TUT1	terminal uridylyl transferase 1, U6 snRNA-specific	18.6254	38.0176	-2.04117	0.00408496	Yes	212505
ENSG00000227540	414245	DNAJC9-AS1	DNAJC9 and MRPS16 antisense RNA 1	78.652	141.039	-1.7932	7.71341e-06	No	713793
ENSG00000136450	6426	SRSF1	serine and arginine rich splicing factor 1	15856.4	23925.7	-1.5089	4.79198e-14	No	623750
ENSG00000174353	378108	TRIM74	tripartite motif containing 74	124.546	183.337	-1.47205	0.000183223	No	157661
ENSG00000272916	8509	NDST2	N-deacetylase and N-sulfotransferase 2	11.6682	16.6136	-1.42383	0.304987	No	981297
ENSG00000185829	51326	ARL17A	ADP ribosylation factor like GTPase 17A	50.445	63.1396	-1.25165	0.0874774	No	82150
ENSG00000273167	221178	SPATA13	spermatogenesis associated 13	1.2517	1.47268	-1.17654	0.834651	No	2508521
ENSG00000271204	---	---	---	26.7127	0.49294	54.1905	2.44163e-07	Yes	1652484
ENSG00000232995	8490	RGS5	regulator of G protein signaling 5	63.4527	71.0122	-1.11914	0.433379	No	456664
ENSG00000140043	145482	PTGR2	prostaglandin reductase 2	290.788	322.762	-1.10996	0.0855628	No	1090839
ENSG00000179818	151516	ASPRV1	aspartic peptidase retroviral like 1	418.007	459.048	-1.09818	0.148863	No	1849148
ENSG00000142634	79180	EFHD2	EF-hand domain family member D2	4796.91	5142.93	-1.07213	0.0053231	No	3288254
ENSG00000106682	7458	EIF4H	eukaryotic translation initiation factor 4H	24878.6	26672.7	-1.07212	0.000980294	No	234261
ENSG00000147669	5440	POLR2K	RNA polymerase II, I and III subunit K	2570.87	2755.81	-1.07194	0.014913	No	39490
ENSG00000087191	5705	PSMC5	proteasome 26S subunit, ATPase 5	9451.37	10131.2	-1.07193	0.00386212	No	483778
ENSG00000137261	9856	KIAA0319	KIAA0319	114.004	122.201	-1.0719	0.49435	No	513899
ENSG00000160789	4000	LMNA	lamin A/C	66912.7	71722.3	-1.07188	0.000642715	No	2155816
ENSG00000238024	---	---	---	47.1718	1.30107	36.2563	5.14065e-08	Yes	465908
ENSG00000121486	81627	TRMT1L	tRNA methyltransferase 1 like	1652.91	1771.68	-1.07185	0.0276325	No	41697
ENSG00000106028	6742	SSBP1	single stranded DNA binding protein 1	4843.54	5191.48	-1.07183	0.00917702	No	1669888
ENSG00000250846	100144602	EPHA5-AS1	EPHA5 antisense RNA 1	137.425	147.29	-1.07178	0.453821	No	1940882
ENSG00000204681	2550	GABBR1	gamma-aminobutyric acid type B receptor subunit 1	1779.87	1907.57	-1.07174	0.105599	No	825142
ENSG00000050405	51474	LIMA1	LIM domain and actin binding 1	8666.17	9287.76	-1.07173	0.00248028	No	690344
ENSG00000157693	203197	TMEM268	transmembrane protein 268	776.873	832.549	-1.07167	0.148454	No	1808861
ENSG00000197170	5718	PSMD12	proteasome 26S subunit, non-ATPase 12	6883.93	7377.18	-1.07165	0.00350596	No	249976
ENSG00000068438	24140	FTSJ1	FtsJ RNA 2'-O-methyltransferase 1	4514.56	4837.36	-1.0715	0.0124715	No	1032288
ENSG00000164687	2171	FABP5	fatty acid binding protein 5	2770.67	2968.62	-1.07145	0.0264859	No	356828
ENSG00000242071	326310	RPL7AP6	ribosomal protein L7a pseudogene 6	6275.44	6723.66	-1.07142	0.00802979	No	446301
ENSG00000232679	---	---	---	28.0312	0.845658	33.1472	2.18966e-06	Yes	545202
ENSG00000126698	22826	DNAJC8	DnaJ heat shock protein family (Hsp40) member C8	8340.74	8935.95	-1.07136	0.0041621	No	221677
ENSG00000139433	51228	GLTP	glycolipid transfer protein	4513.18	4835.21	-1.07135	0.00964933	No	94900
ENSG00000072818	9744	ACAP1	ArfGAP with coiled-coil, ankyrin repeat and PH domains 1	14.1465	15.1551	-1.07129	0.820133	No	621607
ENSG00000101000	10544	PROCR	protein C receptor	2052.86	2199.18	-1.07128	0.0168883	No	29009
ENSG00000232112	51372	TMA7	translation machinery associated 7 homolog	5951.97	6375.81	-1.07121	0.0166255	No	77720
ENSG00000204248	1302	COL11A2	collagen type XI alpha 2 chain	152.268	163.1	-1.07114	0.472148	No	910545
ENSG00000186063	64853	AIDA	axin interactor, dorsalization associated	3145.7	3369.34	-1.07109	0.0121376	No	55856
ENSG00000114988	81562	LMAN2L	lectin, mannose binding 2 like	2150.57	2303.1	-1.07093	0.0496817	No	234241
ENSG00000224388	---	---	---	14.3256	0.49294	29.0615	3.02263e-06	Yes	1732460
ENSG00000159445	117145	THEM4	thioesterase superfamily member 4	828.286	887.031	-1.07092	0.135296	No	1879540
ENSG00000162892	11009	IL24	interleukin 24	12.2693	13.1392	-1.0709	0.85483	No	3134560
ENSG00000158828	65018	PINK1	PTEN induced kinase 1	6954.24	7446.95	-1.07085	0.00475561	No	1358043
ENSG00000065029	7629	ZNF76	zinc finger protein 76	1517.55	1625.04	-1.07083	0.0454666	No	153383
ENSG00000140932	146225	CMTM2	CKLF like MARVEL transmembrane domain containing 2	1.58034	1.69189	-1.07059	0.938129	No	4390411
ENSG00000242445	728992	RPL7AP11	ribosomal protein L7a pseudogene 11	169.3	181.245	-1.07056	0.50692	No	46913
ENSG00000115275	7841	MOGS	mannosyl-oligosaccharide glucosidase	5592.36	5986.69	-1.07051	0.00398815	No	1655838
ENSG00000126226	55795	PCID2	PCI domain containing 2	3104.21	3322.73	-1.07039	0.0142216	No	40708
ENSG00000176058	286262	TPRN	taperin	1158.87	1240.37	-1.07033	0.0626093	No	1043071
ENSG00000251537	---	---	---	39.9641	1.74085	22.9567	4.97795e-06	Yes	41938
ENSG00000269902	---	---	---	31.5752	1.38168	22.8527	1.67342e-06	Yes	313071
ENSG00000182359	143879	KBTBD3	kelch repeat and BTB domain containing 3	229.223	245.313	-1.0702	0.360758	No	1615995
ENSG00000129277	---	---	---	11.1031	0.49294	22.5243	3.44188e-05	Yes	3454990
ENSG00000141385	10939	AFG3L2	AFG3 like matrix AAA peptidase subunit 2	5144.72	5505.68	-1.07016	0.00728829	No	164622
ENSG00000254556	---	---	---	10.9495	0.49294	22.2127	2.16599e-05	Yes	2012977
ENSG00000115484	10575	CCT4	chaperonin containing TCP1 subunit 4	18557	19858.3	-1.07012	0.000948039	No	2332685
ENSG00000213132	---	---	---	10.747	0.49294	21.8019	2.07583e-05	Yes	766686
ENSG00000227844	---	---	---	71.3017	3.32119	21.4687	8.61112e-08	Yes	711718
ENSG00000154065	147463	ANKRD29	ankyrin repeat domain 29	6.13234	6.56142	-1.06997	0.89039	No	850162
ENSG00000173145	64318	NOC3L	NOC3 like DNA replication regulator	4720.73	5050.94	-1.06995	0.00822954	No	439417
ENSG00000216895	100506302	RBM33-DT	RBM33 divergent transcript	132.909	142.197	-1.06989	0.460899	No	44927
ENSG00000135506	10956	OS9	OS9 endoplasmic reticulum lectin	11767.4	12589.3	-1.06984	0.00459014	No	276017
ENSG00000234797	145767	RPS3AP6	RPS3A pseudogene 6	1543.18	1650.87	-1.06978	0.0846374	No	828717
ENSG00000203843	---	---	---	20.882	1.0759	19.4089	1.44215e-05	Yes	824217
ENSG00000266965	---	---	---	9.37781	0.49294	19.0243	1.75015e-05	Yes	161283
ENSG00000065057	4913	NTHL1	nth like DNA glycosylase 1	887.106	948.97	-1.06974	0.0929741	No	431664
ENSG00000223776	100287902	LGALS8-AS1	LGALS8 antisense RNA 1	6.87606	7.35492	-1.06964	0.911726	No	79993
ENSG00000237927	---	---	---	19.3467	1.03031	18.7775	5.88861e-06	Yes	564182
ENSG00000119383	5524	PTPA	protein phosphatase 2 phosphatase activator	11213	11993.8	-1.06963	0.00274357	No	2374231
ENSG00000164896	10922	FASTK	Fas activated serine/threonine kinase	3874.02	4143.74	-1.06962	0.0196451	No	273764
ENSG00000245651	283387	LOC283387	uncharacterized LOC283387	1.29379	1.38384	-1.0696	0.940365	No	73491
ENSG00000165102	138050	HGSNAT	heparan-alpha-glucosaminide N-acetyltransferase	5632.38	6024.24	-1.06957	0.00554134	No	299718
ENSG00000073969	4905	NSF	N-ethylmaleimide sensitive factor, vesicle fusing ATPase	3796.12	4060.04	-1.06952	0.0110395	No	93098
ENSG00000228817	---	---	---	19.8723	1.10365	18.006	2.07583e-05	Yes	2848181
ENSG00000183323	202243	CCDC125	coiled-coil domain containing 125	610.247	652.661	-1.0695	0.155744	No	2785784
ENSG00000198805	4860	PNP	purine nucleoside phosphorylase	4844.65	5181.28	-1.06949	0.013254	No	459723
ENSG00000006075	---	---	---	342.165	19.7154	17.3552	2.86388e-13	Yes	3441521
ENSG00000154001	5529	PPP2R5E	protein phosphatase 2 regulatory subunit B'epsilon	5235.91	5599.16	-1.06938	0.010919	No	422433
ENSG00000259062	161159	ACTN1-DT	ACTN1 divergent transcript	6.35701	6.79782	-1.06934	0.881745	No	143915
ENSG00000095383	55357	TBC1D2	TBC1 domain family member 2	7647.45	8177.64	-1.06933	0.00826955	No	1028105
ENSG00000182552	201965	RWDD4	RWD domain containing 4	1874.73	2004.64	-1.06929	0.0339036	No	61632
ENSG00000173272	653784	MZT2A	mitotic spindle organizing protein 2A	2195.01	2346.98	-1.06923	0.111902	No	412244
ENSG00000203799	221262	CCDC162P	coiled-coil domain containing 162, pseudogene	3.1718	3.39111	-1.06915	0.919369	No	1372797
ENSG00000102144	5230	PGK1	phosphoglycerate kinase 1	19703.3	21065.7	-1.06914	0.00116015	No	497548
ENSG00000256518	---	---	---	7.94521	0.49294	16.118	7.71056e-05	Yes	931326
ENSG00000140854	10300	KATNB1	katanin regulatory subunit B1	2180.77	2331.47	-1.0691	0.0290676	No	136879
ENSG00000266371	---	---	---	7.82242	0.49294	15.8689	4.00714e-05	Yes	107750
ENSG00000198252	6815	STYX	serine/threonine/tyrosine interacting protein	2702.17	2888.83	-1.06908	0.0231179	No	280831
ENSG00000157326	10901	DHRS4	dehydrogenase/reductase 4	583.808	624.113	-1.06904	0.178266	No	685335
ENSG00000233558	100287430	LOC100287430	ribosomal protein S5 pseudogene	61.7365	65.9979	-1.06903	0.654701	No	216055
ENSG00000100422	64781	CERK	ceramide kinase	6034.78	6451.07	-1.06898	0.00753234	No	1903009
ENSG00000197756	6168	RPL37A	ribosomal protein L37a	33358.9	35659.4	-1.06896	0.0254409	No	168111
ENSG00000177646	28976	ACAD9	acyl-CoA dehydrogenase family member 9	3430.47	3666.9	-1.06892	0.00994612	No	140829
ENSG00000267311	---	---	---	9.83456	0.659354	14.9154	0.00022243	Yes	4651153
ENSG00000237417	---	---	---	9.36788	0.635669	14.737	0.000150965	Yes	105248
ENSG00000165424	219654	ZCCHC24	zinc finger CCHC-type containing 24	3760.92	4019.74	-1.06882	0.0178758	No	74506
ENSG00000109618	51091	SEPSECS	Sep (O-phosphoserine) tRNA:Sec (selenocysteine) tRNA synthase	558.781	597.155	-1.06867	0.229425	No	71315
ENSG00000132024	54862	CC2D1A	coiled-coil and C2 domain containing 1A	3174.34	3392.23	-1.06864	0.0126962	No	186841
ENSG00000120784	22835	ZFP30	ZFP30 zinc finger protein	453.355	484.418	-1.06852	0.238077	No	146756
ENSG00000226287	84222	TMEM191A	transmembrane protein 191A (pseudogene)	60.6783	64.8337	-1.06848	0.65047	No	301126
ENSG00000117525	2152	F3	coagulation factor III, tissue factor	43918.4	46924.9	-1.06846	0.00615561	No	298687
ENSG00000111142	10988	METAP2	methionyl aminopeptidase 2	7973.12	8517.42	-1.06827	0.00384499	No	75667
ENSG00000162711	114548	NLRP3	NLR family pyrin domain containing 3	14.7967	15.8057	-1.06819	0.831189	No	1024886
ENSG00000198218	54870	QRICH1	glutamine rich 1	5619.84	6002.91	-1.06816	0.0119214	No	727848
ENSG00000122126	4952	OCRL	OCRL inositol polyphosphate-5-phosphatase	4648.46	4965.09	-1.06811	0.0152413	No	1616112
ENSG00000242697	100270833	RPL5P12	ribosomal protein L5 pseudogene 12	5.99302	6.40087	-1.06806	0.881598	No	163072
ENSG00000101335	10398	MYL9	myosin light chain 9	37579.1	40134.1	-1.06799	0.0146042	No	1380286
ENSG00000214293	100505854	APTR	Alu-mediated CDKN1A/p21 transcriptional regulator	285.674	305.079	-1.06793	0.317941	No	110087
ENSG00000258861	---	---	---	6.73716	0.49294	13.6673	9.47692e-05	Yes	1355605
ENSG00000180628	84333	PCGF5	polycomb group ring finger 5	8841.14	9441.45	-1.0679	0.0109892	No	232850
ENSG00000215835	284685	LOC284685	EWS RNA binding protein 1 pseudogene	353.387	377.381	-1.0679	0.296937	No	549307
ENSG00000132286	26515	TIMM10B	translocase of inner mitochondrial membrane 10B	1546.71	1651.66	-1.06785	0.0407629	No	507574
ENSG00000161570	---	---	---	6.57476	0.49294	13.3378	0.00158531	Yes	3231803
ENSG00000168904	123355	LRRC28	leucine rich repeat containing 28	641.338	684.841	-1.06783	0.129701	No	61369
ENSG00000250069	---	---	---	6.53312	0.49294	13.2534	0.00156485	Yes	178863
ENSG00000103199	26048	ZNF500	zinc finger protein 500	974.734	1040.84	-1.06782	0.0880812	No	159212
ENSG00000127399	65999	LRRC61	leucine rich repeat containing 61	103.262	110.259	-1.06775	0.642113	No	21619
ENSG00000180822	389362	PSMG4	proteasome assembly chaperone 4	886.287	946.234	-1.06764	0.10358	No	471467
ENSG00000196951	100129858	SCOC-AS1	SCOC antisense RNA 1	26.3117	28.0893	-1.06756	0.810706	No	708433
ENSG00000264853	---	---	---	6.33739	0.49294	12.8563	0.000158112	Yes	52597
ENSG00000155868	9443	MED7	mediator complex subunit 7	736.049	785.776	-1.06756	0.153446	No	3358
ENSG00000087460	2778	GNAS	GNAS complex locus	37464	39994.6	-1.06755	0.00232134	No	107694
ENSG00000241007	100418720	SEPTIN7P6	septin 7 pseudogene 6	44.0083	46.98	-1.06753	0.766245	No	67468
ENSG00000225790	---	---	---	68.4662	5.48232	12.4886	3.52196e-08	Yes	428257
ENSG00000131019	79465	ULBP3	UL16 binding protein 3	205.879	219.775	-1.0675	0.419006	No	141997
ENSG00000135338	167691	LCA5	lebercilin LCA5	504.979	539.022	-1.06741	0.178539	No	39614
ENSG00000250280	---	---	---	18.4829	1.52026	12.1577	9.88105e-06	Yes	531803
ENSG00000232573	326307	RPL3P4	ribosomal protein L3 pseudogene 4	1731.71	1848.4	-1.06738	0.0852737	No	3427462
ENSG00000170852	25948	KBTBD2	kelch repeat and BTB domain containing 2	2967.33	3167.06	-1.06731	0.0254401	No	201849
ENSG00000254936	---	---	---	11.8917	1.01953	11.6639	0.000260265	Yes	2025520
ENSG00000222031	---	---	---	5.74063	0.49294	11.6457	0.000340785	Yes	170564
ENSG00000163607	29083	GTPBP8	GTP binding protein 8 (putative)	1294.86	1382	-1.0673	0.0445642	No	323917
ENSG00000154832	30827	CXXC1	CXXC finger protein 1	3082.96	3290.2	-1.06722	0.0166993	No	80417
ENSG00000136636	51133	KCTD3	potassium channel tetramerization domain containing 3	4453.98	4752.92	-1.06712	0.018511	No	23129
ENSG00000173349	84826	SFT2D3	SFT2 domain containing 3	405.691	432.875	-1.06701	0.240228	No	98837
ENSG00000134480	902	CCNH	cyclin H	2461.2	2625.94	-1.06694	0.0200485	No	2366744
ENSG00000124279	79072	FASTKD3	FAST kinase domains 3	604.533	644.952	-1.06686	0.164929	No	1038993
ENSG00000226928	---	---	---	5.60859	0.49294	11.3778	0.000327448	Yes	81704
ENSG00000197136	399909	PCNX3	pecanex 3	6842.65	7299.85	-1.06682	0.0244093	No	2139960
ENSG00000234290	---	---	---	17.0802	1.50932	11.3165	3.36331e-05	Yes	345435
ENSG00000104967	4858	NOVA2	NOVA alternative splicing regulator 2	1.718	1.83277	-1.0668	0.93193	No	72651
ENSG00000184347	6586	SLIT3	slit guidance ligand 3	4228.45	4509.92	-1.06657	0.0349299	No	141882
ENSG00000269510	---	---	---	7.07794	0.635669	11.1346	0.000490687	Yes	160083
ENSG00000236453	---	---	---	319.072	28.6564	11.1344	2.51936e-13	Yes	1317611
ENSG00000235751	---	---	---	5.45548	0.49294	11.0672	0.000606071	Yes	1193391
ENSG00000258469	---	---	---	13.1314	1.18992	11.0356	0.00022229	Yes	284745
ENSG00000207574	724031	MIR661	microRNA 661	2.65232	2.82887	-1.06656	0.923698	No	186371
ENSG00000132394	60678	EEFSEC	eukaryotic elongation factor, selenocysteine-tRNA specific	675.251	720.195	-1.06656	0.15381	No	194017
ENSG00000169660	284004	HEXD	hexosaminidase D	673.416	718.137	-1.06641	0.172538	No	574608
ENSG00000257246	---	---	---	5.35724	0.49294	10.8679	0.00103184	Yes	819165
ENSG00000134318	9475	ROCK2	Rho associated coiled-coil containing protein kinase 2	8141.89	8682.43	-1.06639	0.0229965	No	1460314
ENSG00000176824	---	---	---	8.42534	0.784108	10.7451	0.000356405	Yes	437339
ENSG00000196476	140680	C20orf96	chromosome 20 open reading frame 96	400.868	427.464	-1.06635	0.223718	No	229300
ENSG00000006025	114881	OSBPL7	oxysterol binding protein like 7	1264.26	1347.99	-1.06623	0.10282	No	569442
ENSG00000225083	---	---	---	5.10632	0.49294	10.3589	0.00115556	Yes	183668
ENSG00000231865	---	---	---	10.6097	1.025	10.351	0.000153412	Yes	2588285
ENSG00000091009	54439	RBM27	RNA binding motif protein 27	3899.95	4158.19	-1.06622	0.0203391	No	407725
ENSG00000114686	11222	MRPL3	mitochondrial ribosomal protein L3	6546.32	6979.71	-1.06621	0.00669597	No	2764216
ENSG00000273165	---	---	---	5.05779	0.49294	10.2605	0.00205695	Yes	80712
ENSG00000226520	---	---	---	13.0687	1.28179	10.1956	0.000253253	Yes	212840
ENSG00000253350	---	---	---	13.2579	1.30107	10.19	0.000100543	Yes	4479639
ENSG00000135093	84749	USP30	ubiquitin specific peptidase 30	755.136	805.12	-1.06619	0.121038	No	952298
ENSG00000248682	---	---	---	17.1696	1.691	10.1535	9.79701e-05	Yes	129593
ENSG00000197604	---	---	---	11.1145	1.10244	10.0817	0.000258432	Yes	876937
ENSG00000232626	100420423	LOC100420423	FKBP prolyl isomerase 8 pseudogene	1.62265	1.73002	-1.06617	0.939321	No	1528042
ENSG00000228222	---	---	---	21.0857	2.11032	9.9917	1.31983e-05	Yes	312522
ENSG00000231697	---	---	---	6.31641	0.635669	9.93663	0.00088961	Yes	52078
ENSG00000252873	---	---	---	6.30742	0.635669	9.92249	0.000589657	Yes	1483184
ENSG00000205300	---	---	---	4.88744	0.49294	9.91488	0.000965182	Yes	1137999
ENSG00000038219	259282	BOD1L1	biorientation of chromosomes in cell division 1 like 1	4685.47	4995.34	-1.06613	0.0937903	No	4072254
ENSG00000246763	503569	RGMB-AS1	RGMB antisense RNA 1	10.6802	11.3856	-1.06604	0.874068	No	2925912
ENSG00000168291	5162	PDHB	pyruvate dehydrogenase E1 subunit beta	6366.81	6787.26	-1.06604	0.00785032	No	1155881
ENSG00000262265	---	---	---	6.26243	0.635669	9.8517	0.00140729	Yes	89895
ENSG00000223838	---	---	---	20.0671	2.04701	9.80313	2.47621e-05	Yes	1496849
ENSG00000235776	728139	RPL7AP70	ribosomal protein L7a pseudogene 70	367.227	391.473	-1.06603	0.29139	No	42264
ENSG00000131508	7322	UBE2D2	ubiquitin conjugating enzyme E2 D2	7770.22	8282.95	-1.06599	0.00645856	No	406280
ENSG00000243279	11230	PRAF2	PRA1 domain family member 2	2051.79	2186.76	-1.06578	0.0559398	No	856203
ENSG00000236375	---	---	---	7.21752	0.748072	9.64817	0.00182239	Yes	362225
ENSG00000205403	3426	CFI	complement factor I	3.9197	4.17748	-1.06577	0.909053	No	175783
ENSG00000057019	131566	DCBLD2	discoidin, CUB and LCCL domain containing 2	119073	126904	-1.06576	0.00181928	No	502463
ENSG00000253672	---	---	---	4.72096	0.49294	9.57715	0.000893875	Yes	3263738
ENSG00000136758	10730	YME1L1	YME1 like 1 ATPase	13148.5	14013	-1.06575	0.00288019	No	45968
ENSG00000125510	4987	OPRL1	opioid related nociceptin receptor 1	3.82671	4.07797	-1.06566	0.914478	No	778107
ENSG00000233308	106480738	OSTN-AS1	OSTN antisense RNA 1	1.94566	2.07325	-1.06558	0.940412	No	3822748
ENSG00000272219	---	---	---	4.64593	0.49294	9.42494	0.00162644	Yes	1860092
ENSG00000159753	146206	CARMIL2	capping protein regulator and myosin 1 linker 2	27.8237	29.6467	-1.06552	0.76494	No	3324940
ENSG00000256325	---	---	---	4.53704	0.49294	9.20405	0.00147652	Yes	527575
ENSG00000044574	3309	HSPA5	heat shock protein family A (Hsp70) member 5	53144.3	56621.8	-1.06543	0.000958746	No	414389
ENSG00000125249	5911	RAP2A	RAP2A, member of RAS oncogene family	3429.87	3654.29	-1.06543	0.0211236	No	452384
ENSG00000105258	5438	POLR2I	RNA polymerase II subunit I	1210.23	1289.41	-1.06542	0.175798	No	1723746
ENSG00000254598	283106	CSNK2A3	casein kinase 2 alpha 3	852.578	908.356	-1.06542	0.105047	No	387725
ENSG00000240087	387867	RPSAP12	ribosomal protein SA pseudogene 12	224.361	239.032	-1.06539	0.396717	No	253338
ENSG00000259001	---	---	---	210.578	23.1731	9.08716	1.5659e-08	Yes	334453
ENSG00000257365	2342	FNTB	farnesyltransferase, CAAX box, beta	610.422	650.3	-1.06533	0.250394	No	601809
ENSG00000132661	29107	NXT1	nuclear transport factor 2 like export factor 1	904.313	963.376	-1.06531	0.114069	No	77173
ENSG00000231672	---	---	---	858.757	95.2452	9.01627	9.6972e-15	Yes	349747
ENSG00000255302	23741	EID1	EP300 interacting inhibitor of differentiation 1	9927.76	10573.5	-1.06505	0.00655127	No	2543136
ENSG00000102595	55757	UGGT2	UDP-glucose glycoprotein glucosyltransferase 2	2469.91	2630.3	-1.06494	0.0878542	No	380942
ENSG00000131778	9557	CHD1L	chromodomain helicase DNA binding protein 1 like	3951.85	4208.05	-1.06483	0.0132781	No	63014
ENSG00000112167	55776	SAYSD1	SAYSVFN motif domain containing 1	473.048	503.708	-1.06481	0.222446	No	341167
ENSG00000232732	101927687	LOC101927687	uncharacterized LOC101927687	4.88425	5.20055	-1.06476	0.894848	No	1123158
ENSG00000215039	678655	CD27-AS1	CD27 antisense RNA 1	325.346	346.414	-1.06476	0.400592	No	924671
ENSG00000168569	79064	TMEM223	transmembrane protein 223	649.828	691.905	-1.06475	0.230745	No	153440
ENSG00000266498	---	---	---	8.81749	0.995177	8.86022	0.000374376	Yes	123731
ENSG00000233276	2876	GPX1	glutathione peroxidase 1	7519.3	8006.1	-1.06474	0.00801925	No	992085
ENSG00000260810	---	---	---	6.19597	0.703539	8.80687	0.00207193	Yes	301615
ENSG00000221716	677799	SNORA11	small nucleolar RNA, H/ACA box 11	5.3329	5.6774	-1.0646	0.909601	No	243714
ENSG00000269549	---	---	---	9.4034	1.07174	8.77394	0.000742216	Yes	4467810
ENSG00000150455	114609	TIRAP	TIR domain containing adaptor protein	494.853	526.792	-1.06454	0.237084	No	423267
ENSG00000138107	10121	ACTR1A	actin related protein 1A	19458.5	20711.9	-1.06441	0.00334801	No	385273
ENSG00000183580	23194	FBXL7	F-box and leucine rich repeat protein 7	1838.25	1956.63	-1.0644	0.0751048	No	2965901
ENSG00000215346	---	---	---	9.11149	1.04575	8.71287	0.00159884	Yes	2021349
ENSG00000253284	---	---	---	17.3207	1.99595	8.6779	0.000233526	Yes	332632
ENSG00000150316	51503	CWC15	CWC15 spliceosome associated protein homolog	2672.29	2844.27	-1.06436	0.0422869	No	375730
ENSG00000233708	---	---	---	4.23627	0.49294	8.59388	0.00455605	Yes	229484
ENSG00000126821	81537	SGPP1	sphingosine-1-phosphate phosphatase 1	3028.08	3222.88	-1.06433	0.055783	No	584138
ENSG00000249365	---	---	---	7.25182	0.848633	8.54529	0.00106746	Yes	90412
ENSG00000175634	6199	RPS6KB2	ribosomal protein S6 kinase B2	2518.39	2680.41	-1.06433	0.0351857	No	397738
ENSG00000197457	50861	STMN3	stathmin 3	93.7611	99.7883	-1.06428	0.570614	No	351360
ENSG00000253227	---	---	---	58.8438	6.94914	8.46778	7.61553e-08	Yes	964656
ENSG00000261773	---	---	---	9.62438	1.13802	8.45713	0.000353886	Yes	349903
ENSG00000269755	---	---	---	5.37406	0.635669	8.45417	0.00133079	Yes	732050
ENSG00000086666	54469	ZFAND6	zinc finger AN1-type containing 6	3725.03	3964.15	-1.06419	0.0690419	No	613443
ENSG00000253372	---	---	---	7.4311	0.879487	8.44935	0.00056635	Yes	498626
ENSG00000262119	---	---	---	13.9204	1.64923	8.44054	0.000155983	Yes	3326262
ENSG00000163684	11102	RPP14	ribonuclease P/MRP subunit p14	2199.43	2340.53	-1.06415	0.0284654	No	1028272
ENSG00000232487	---	---	---	9.84388	1.17958	8.34523	0.00033039	Yes	259469
ENSG00000235619	---	---	---	4.1128	0.49294	8.3434	0.00229113	Yes	304277
ENSG00000227383	---	---	---	4.11261	0.49294	8.34303	0.00190809	Yes	1011353
ENSG00000178952	7284	TUFM	Tu translation elongation factor, mitochondrial	11280.2	12003.7	-1.06414	0.00684532	No	127852
ENSG00000163938	26354	GNL3	G protein nucleolar 3	6309.07	6713.66	-1.06413	0.0167449	No	532465
ENSG00000110347	---	---	---	7.66423	0.933751	8.208	0.00324822	Yes	127048
ENSG00000261544	---	---	---	4.02245	0.49294	8.16013	0.00393095	Yes	44316
ENSG00000232952	401957	LOC401957	matrin 3 pseudogene	194.857	207.334	-1.06403	0.480986	No	2599170
ENSG00000131620	55107	ANO1	anoctamin 1	20.0278	21.3095	-1.064	0.820419	No	33674
ENSG00000106588	5683	PSMA2	proteasome 20S subunit alpha 2	571.897	608.441	-1.0639	0.2358	No	647322
ENSG00000134759	55250	ELP2	elongator acetyltransferase complex subunit 2	3899.14	4148.22	-1.06388	0.0132622	No	62924
ENSG00000256594	374443	LOC374443	C-type lectin domain family 2 member D pseudogene	115.579	122.959	-1.06385	0.591971	No	621477
ENSG00000125637	23550	PSD4	pleckstrin and Sec7 domain containing 4	1668.82	1775.32	-1.06382	0.0558047	No	798929
ENSG00000102908	10725	NFAT5	nuclear factor of activated T cells 5	4695.59	4995.18	-1.0638	0.186784	No	1404765
ENSG00000066654	55623	THUMPD1	THUMP domain containing 1	1930.74	2053.86	-1.06377	0.0453324	No	52449
ENSG00000063978	6047	RNF4	ring finger protein 4	6454.66	6865.95	-1.06372	0.0208691	No	870662
ENSG00000064763	55711	FAR2	fatty acyl-CoA reductase 2	1285.82	1367.64	-1.06364	0.0696395	No	90663
ENSG00000118894	196483	EEF2KMT	eukaryotic elongation factor 2 lysine methyltransferase	946.022	1006.2	-1.06362	0.185085	No	170350
ENSG00000112941	11044	TENT4A	terminal nucleotidyltransferase 4A	2921.62	3107.39	-1.06359	0.0329338	No	2193424
ENSG00000137478	9873	FCHSD2	FCH and double SH3 domains 2	2960.68	3148.52	-1.06345	0.0334532	No	1914765
ENSG00000115255	92840	REEP6	receptor accessory protein 6	262.637	279.296	-1.06343	0.364737	No	1637249
ENSG00000174547	65003	MRPL11	mitochondrial ribosomal protein L11	2617.54	2783.52	-1.06341	0.0258406	No	1359461
ENSG00000229473	---	---	---	5.2103	0.659354	7.90213	0.00785823	Yes	52669
ENSG00000267346	---	---	---	5.01293	0.635669	7.88607	0.00197638	Yes	917627
ENSG00000251168	---	---	---	3.84977	0.49294	7.80982	0.00311876	Yes	983737
ENSG00000137547	29088	MRPL15	mitochondrial ribosomal protein L15	3976.04	4228.01	-1.06337	0.0178002	No	494316
ENSG00000039523	79567	RIPOR1	RHO family interacting cell polarization regulator 1	9497.27	10097.9	-1.06324	0.00835718	No	3451441
ENSG00000254221	56104	PCDHGB1	protocadherin gamma subfamily B, 1	351.951	374.179	-1.06316	0.354908	No	970607
ENSG00000213144	---	---	---	90.9665	11.7536	7.73947	1.0619e-08	Yes	341220
ENSG00000261574	---	---	---	6.79357	0.879487	7.72447	0.000978715	Yes	282661
ENSG00000198478	83699	SH3BGRL2	SH3 domain binding glutamate rich protein like 2	158.409	168.399	-1.06306	0.497386	No	133440
ENSG00000132952	10208	USPL1	ubiquitin specific peptidase like 1	1210.96	1287.22	-1.06297	0.0711397	No	1273
ENSG00000255342	---	---	---	3.77392	0.49294	7.65594	0.0057675	Yes	2722114
ENSG00000105514	9545	RAB3D	RAB3D, member RAS oncogene family	221.718	235.657	-1.06287	0.413013	No	406147
ENSG00000257879	---	---	---	6.72402	0.879487	7.64539	0.003638	Yes	1074579
ENSG00000166181	8539	API5	apoptosis inhibitor 5	10302.7	10950	-1.06282	0.00423257	No	549079
ENSG00000235919	645676	ASH1L-AS1	ASH1L antisense RNA 1	59.1485	62.8623	-1.06279	0.720672	No	2676359
ENSG00000144224	23190	UBXN4	UBX domain protein 4	9893.33	10512.5	-1.06258	0.00717394	No	3836068
ENSG00000237037	100132273	NDUFA6-DT	NDUFA6 divergent transcript	57.3859	60.9761	-1.06256	0.711311	No	1613617
ENSG00000232873	---	---	---	5.73404	0.765225	7.49327	0.0031673	Yes	1481776
ENSG00000271749	---	---	---	5.70682	0.765225	7.4577	0.00600497	Yes	49982
ENSG00000224416	---	---	---	4.73102	0.635669	7.44258	0.00811221	Yes	2547167
ENSG00000131788	10401	PIAS3	protein inhibitor of activated STAT 3	3809.49	4047.78	-1.06255	0.0400088	No	137787
ENSG00000105983	64327	LMBR1	limb development membrane protein 1	3749.87	3984.14	-1.06247	0.0200651	No	210258
ENSG00000167632	83696	TRAPPC9	trafficking protein particle complex subunit 9	1139.02	1210.11	-1.06241	0.0762819	No	439786
ENSG00000253420	---	---	---	4.88457	0.659354	7.40812	0.00279342	Yes	5574670
ENSG00000120318	64411	ARAP3	ArfGAP with RhoGAP domain, ankyrin repeat and PH domain 3	2624.48	2788.25	-1.0624	0.038809	No	937513
ENSG00000105443	9266	CYTH2	cytohesin 2	3742.31	3975.77	-1.06238	0.0763211	No	800270
ENSG00000185722	51479	ANKFY1	ankyrin repeat and FYVE domain containing 1	6338.67	6732.9	-1.06219	0.0399517	No	235082
ENSG00000063601	8776	MTMR1	myotubularin related protein 1	3914.89	4158.33	-1.06218	0.0352986	No	250783
ENSG00000227467	101928555	LINC01537	long intergenic non-protein coding RNA 1537	3.50465	3.72247	-1.06215	0.919217	No	1343164
ENSG00000164932	115908	CTHRC1	collagen triple helix repeat containing 1	26.5212	28.1692	-1.06214	0.784278	No	3260421
ENSG00000079134	9984	THOC1	THO complex subunit 1	1736.94	1844.85	-1.06213	0.0419168	No	58815
ENSG00000246273	283104	SBF2-AS1	SBF2 antisense RNA 1	253.358	269.086	-1.06208	0.415096	No	92070
ENSG00000255663	---	---	---	6.80046	0.930064	7.31182	0.00293688	Yes	98253
ENSG00000238604	---	---	---	3.6039	0.49294	7.31103	0.00255331	Yes	378713
ENSG00000242094	---	---	---	13.2067	1.80728	7.30751	0.000143185	Yes	881913
ENSG00000129116	23022	PALLD	palladin, cytoskeletal associated protein	24719.2	26249.4	-1.0619	0.00632348	No	71967
ENSG00000124181	5335	PLCG1	phospholipase C gamma 1	7259.14	7708.35	-1.06188	0.0207494	No	159339
ENSG00000224051	80772	CPTP	ceramide-1-phosphate transfer protein	2462.03	2614.11	-1.06177	0.0528777	No	1035021
ENSG00000198815	22887	FOXJ3	forkhead box J3	3695.06	3923.11	-1.06172	0.0340038	No	782374
ENSG00000091622	83394	PITPNM3	PITPNM family member 3	1192.33	1265.9	-1.0617	0.0797703	No	157806
ENSG00000139168	85437	ZCRB1	zinc finger CCHC-type and RNA binding motif containing 1	2800.27	2973.05	-1.0617	0.027847	No	1229926
ENSG00000273261	---	---	---	3.53426	0.49294	7.16975	0.00473877	Yes	1091028
ENSG00000153208	10461	MERTK	MER proto-oncogene, tyrosine kinase	104.059	110.475	-1.06165	0.591743	No	459176
ENSG00000147027	83604	TMEM47	transmembrane protein 47	4439.93	4713.58	-1.06163	0.0200637	No	7913193
ENSG00000266805	---	---	---	3.52679	0.49294	7.15461	0.0115367	Yes	39768
ENSG00000088538	1795	DOCK3	dedicator of cytokinesis 3	133.742	141.983	-1.06162	0.535655	No	335093
ENSG00000197748	80217	CFAP43	cilia and flagella associated protein 43	37.6434	39.9613	-1.06158	0.753346	No	307318
ENSG00000231121	---	---	---	7.93782	1.11042	7.14848	0.00067578	Yes	43210
ENSG00000153956	781	CACNA2D1	calcium voltage-gated channel auxiliary subunit alpha2delta 1	9531.37	10116.4	-1.06138	0.0510761	No	582173
ENSG00000221916	55150	C19orf73	chromosome 19 open reading frame 73	13.8587	14.7085	-1.06132	0.874068	No	150163
ENSG00000256450	---	---	---	4.53704	0.635669	7.13743	0.00498228	Yes	132065
ENSG00000196796	---	---	---	6.05673	0.848633	7.13704	0.00413476	Yes	320047
ENSG00000270661	---	---	---	3.4958	0.49294	7.09173	0.00356348	Yes	286318
ENSG00000149273	6188	RPS3	ribosomal protein S3	46998	49879	-1.0613	0.00268157	No	497399
ENSG00000043143	23338	JADE2	jade family PHD finger 2	5040.77	5349.49	-1.06125	0.0387285	No	363258
ENSG00000256712	---	---	---	6.12206	0.867592	7.05639	0.00291207	Yes	128536
ENSG00000158717	115992	RNF166	ring finger protein 166	921.425	977.835	-1.06122	0.126825	No	422863
ENSG00000114062	7337	UBE3A	ubiquitin protein ligase E3A	7827.33	8306	-1.06115	0.011636	No	2780520
ENSG00000106348	3614	IMPDH1	inosine monophosphate dehydrogenase 1	3028.31	3213.49	-1.06115	0.0412876	No	145104
ENSG00000224376	---	---	---	57.4661	8.18441	7.02141	6.09239e-08	Yes	763980
ENSG00000236535	---	---	---	3.43035	0.49294	6.95897	0.0079962	Yes	65369
ENSG00000251682	---	---	---	5.87308	0.845658	6.94499	0.00565884	Yes	414683
ENSG00000225761	---	---	---	6.74661	0.972877	6.9347	0.00274916	Yes	787810
ENSG00000256651	100420580	LOC100420580	taste 2 receptor member 7 pseudogene	5.39968	5.72984	-1.06114	0.910028	No	467873
ENSG00000137275	8737	RIPK1	receptor interacting serine/threonine kinase 1	2890.56	3067.26	-1.06113	0.0350114	No	304055
ENSG00000111801	10384	BTN3A3	butyrophilin subfamily 3 member A3	569.071	603.842	-1.0611	0.235861	No	266792
ENSG00000221823	5534	PPP3R1	protein phosphatase 3 regulatory subunit B, alpha	5363.94	5691.55	-1.06108	0.0155615	No	16539
ENSG00000239776	---	---	---	3799.62	551.082	6.89485	1.1459e-11	Yes	1798161
ENSG00000135945	51455	REV1	REV1 DNA directed polymerase	2122.68	2252.16	-1.061	0.0472677	No	575468
ENSG00000186648	90668	CARMIL3	capping protein regulator and myosin 1 linker 3	3.13857	3.32982	-1.06094	0.933392	No	783746
ENSG00000269194	105372435	LOC105372435	uncharacterized LOC105372435	5.93128	6.29206	-1.06083	0.895939	No	539119
ENSG00000108592	117246	FTSJ3	FtsJ RNA 2'-O-methyltransferase 3	4720.22	5007.13	-1.06078	0.0184505	No	486637
ENSG00000175137	80851	SH3BP5L	SH3 binding domain protein 5 like	5377.12	5703.62	-1.06072	0.0159038	No	2566259
ENSG00000224972	---	---	---	3.36002	0.49294	6.81629	0.00707886	Yes	517172
ENSG00000203879	2664	GDI1	GDP dissociation inhibitor 1	9847.35	10444.9	-1.06068	0.0143178	No	431591
ENSG00000179632	84232	MAF1	MAF1 homolog, negative regulator of RNA polymerase III	4997.58	5299.6	-1.06043	0.0238231	No	326327
ENSG00000225300	---	---	---	3.34066	0.49294	6.777	0.00942637	Yes	214603
ENSG00000149292	54970	TTC12	tetratricopeptide repeat domain 12	810.066	858.964	-1.06036	0.170355	No	351994
ENSG00000202222	---	---	---	3.32818	0.49294	6.75169	0.00590501	Yes	2659937
ENSG00000168994	221749	PXDC1	PX domain containing 1	3939.25	4176.06	-1.06012	0.026486	No	399095
ENSG00000177302	7156	TOP3A	DNA topoisomerase III alpha	2063.29	2187.24	-1.06007	0.100597	No	372590
ENSG00000248266	---	---	---	4.2593	0.635669	6.7005	0.00915075	Yes	169596
ENSG00000140598	79631	EFL1	elongation factor like GTPase 1	3911.43	4146.37	-1.06007	0.0305743	No	832352
ENSG00000196961	160	AP2A1	adaptor related protein complex 2 subunit alpha 1	11576	12271.1	-1.06005	0.0119384	No	497154
ENSG00000140718	79068	FTO	FTO alpha-ketoglutarate dependent dioxygenase	3098.3	3284.01	-1.05994	0.0388553	No	1316822
ENSG00000144711	9922	IQSEC1	IQ motif and Sec7 domain ArfGEF 1	2522.67	2673.86	-1.05993	0.0865176	No	1705933
ENSG00000266995	---	---	---	58.0873	8.73512	6.64985	2.3245e-07	Yes	501636
ENSG00000251949	---	---	---	6.61571	0.995177	6.64777	0.00282781	Yes	1474782
ENSG00000136068	2317	FLNB	filamin B	30478.8	32304.1	-1.05989	0.0677572	No	730425
ENSG00000258875	---	---	---	8.10507	1.22246	6.63014	0.0027919	Yes	286075
ENSG00000100804	5693	PSMB5	proteasome 20S subunit beta 5	8821.25	9348.92	-1.05982	0.00771013	No	232376
ENSG00000226329	---	---	---	8.1899	1.24038	6.60276	0.00284349	Yes	357018
ENSG00000264167	---	---	---	3.25443	0.49294	6.60208	0.00464123	Yes	416699
ENSG00000232053	---	---	---	5.79664	0.879487	6.59093	0.00299931	Yes	324994
ENSG00000266037	---	---	---	21.2784	3.23143	6.58482	1.75147e-05	Yes	36519
ENSG00000198315	7745	ZKSCAN8	zinc finger with KRAB and SCAN domains 8	3125.48	3312.4	-1.0598	0.0501817	No	37212
ENSG00000204396	80737	VWA7	von Willebrand factor A domain containing 7	30.4567	32.2751	-1.0597	0.790798	No	504225
ENSG00000267414	101927943	SETBP1-DT	SETBP1 divergent transcript	20.4601	21.6814	-1.05969	0.839971	No	805398
ENSG00000184939	146198	ZFP90	ZFP90 zinc finger protein	2275.36	2411.07	-1.05964	0.0736659	No	2439769
ENSG00000196114	---	---	---	3.22941	0.49294	6.55133	0.0104738	Yes	528360
ENSG00000205090	339453	TMEM240	transmembrane protein 240	140.322	148.687	-1.05961	0.570614	No	819325
ENSG00000164405	27089	UQCRQ	ubiquinol-cytochrome c reductase complex III subunit VII	4822.13	5109.25	-1.05954	0.0500717	No	317903
ENSG00000259644	---	---	---	10.0937	1.55094	6.50814	0.00586298	Yes	3091451
ENSG00000158526	90121	TSR2	TSR2 ribosome maturation factor	2342.23	2481.61	-1.05951	0.0555642	No	129922
ENSG00000113460	55299	BRIX1	biogenesis of ribosomes BRX1	2447.65	2593.29	-1.0595	0.0696172	No	228244
ENSG00000267209	---	---	---	3.19034	0.49294	6.47206	0.00620315	Yes	7736130
ENSG00000255986	4498	MT1JP	metallothionein 1J, pseudogene	2.15462	2.28279	-1.05948	0.9365	No	453937
ENSG00000181830	55343	SLC35C1	solute carrier family 35 member C1	2666.56	2824.76	-1.05933	0.0604594	No	1159715
ENSG00000261618	---	---	---	27.1127	4.2321	6.40645	1.51305e-05	Yes	906018
ENSG00000251769	---	---	---	3.15686	0.49294	6.40415	0.00917234	Yes	1484926
ENSG00000174516	246330	PELI3	pellino E3 ubiquitin protein ligase family member 3	867.12	918.468	-1.05922	0.220703	No	1359453
ENSG00000227248	---	---	---	9.32975	1.45854	6.39664	0.0023525	Yes	2915697
ENSG00000170439	196410	METTL7B	methyltransferase like 7B	116.631	123.529	-1.05915	0.610277	No	710753
ENSG00000138821	64116	SLC39A8	solute carrier family 39 member 8	2817.13	2983.6	-1.05909	0.0575541	No	48512
ENSG00000119782	2281	FKBP1B	FKBP prolyl isomerase 1B	212.24	224.762	-1.059	0.445174	No	47367
ENSG00000109184	23142	DCUN1D4	defective in cullin neddylation 1 domain containing 4	4126.41	4369.06	-1.05881	0.0452162	No	339248
ENSG00000154358	84033	OBSCN	obscurin, cytoskeletal calmodulin and titin-interacting RhoGEF	511.23	541.283	-1.05879	0.306538	No	655702
ENSG00000237984	11191	PTENP1	phosphatase and tensin homolog pseudogene 1	35.546	37.6354	-1.05878	0.761549	No	1271005
ENSG00000237090	---	---	---	3.13857	0.49294	6.36704	0.00605658	Yes	225821
ENSG00000087338	64395	GMCL1	germ cell-less 1, spermatogenesis associated	1525.58	1615.14	-1.05871	0.147378	No	1589945
ENSG00000170703	284076	TTLL6	tubulin tyrosine ligase like 6	1.2879	1.36341	-1.05863	0.950799	No	1564818
ENSG00000260865	---	---	---	3.12894	0.49294	6.34751	0.00670114	Yes	79236
ENSG00000259735	---	---	---	3.12844	0.49294	6.34649	0.00487681	Yes	420261
ENSG00000165572	89890	KBTBD6	kelch repeat and BTB domain containing 6	1391.03	1472.41	-1.0585	0.0834954	No	86268
ENSG00000152234	498	ATP5F1A	ATP synthase F1 subunit alpha	25284.6	26751.4	-1.05801	0.00610053	No	618685
ENSG00000006042	26022	TMEM98	transmembrane protein 98	1042.01	1102.31	-1.05787	0.141719	No	278935
ENSG00000251474	132241	RPL32P3	ribosomal protein L32 pseudogene 3	486.759	514.913	-1.05784	0.29089	No	660887
ENSG00000253374	---	---	---	3.10337	0.49294	6.29564	0.0151946	Yes	115573
ENSG00000162441	84328	LZIC	leucine zipper and CTNNBIP1 domain containing	1929.7	2040.87	-1.05761	0.0935281	No	450930
ENSG00000262580	---	---	---	172.877	27.5077	6.28465	7.56708e-10	Yes	26344
ENSG00000104936	1760	DMPK	DM1 protein kinase	4968.08	5254.28	-1.05761	0.0334532	No	263645
ENSG00000185483	4919	ROR1	receptor tyrosine kinase like orphan receptor 1	2457.5	2599.03	-1.05759	0.0813103	No	258414
ENSG00000235453	100129250	SMIM27	small integral membrane protein 27	137.247	145.149	-1.05758	0.5754	No	144651
ENSG00000234584	---	---	---	9.4513	1.52026	6.2169	0.00105689	Yes	120842
ENSG00000148308	9328	GTF3C5	general transcription factor IIIC subunit 5	3332.98	3524.68	-1.05752	0.0365283	No	19439
ENSG00000116251	6146	RPL22	ribosomal protein L22	15972.4	16888.5	-1.05736	0.0219482	No	3973720
ENSG00000232623	---	---	---	7.33551	1.1898	6.16534	0.00377879	Yes	18935
ENSG00000260417	---	---	---	4.32774	0.703539	6.15139	0.0147406	Yes	431862
ENSG00000100983	2937	GSS	glutathione synthetase	4005.57	4235.17	-1.05732	0.0322758	No	245266
ENSG00000254106	---	---	---	3.90092	0.635669	6.13671	0.0316756	Yes	143721
ENSG00000119487	79109	MAPKAP1	MAPK associated protein 1	10640.6	11250.1	-1.05728	0.0121318	No	472891
ENSG00000227242	---	---	---	95.3027	15.569	6.12133	1.97708e-09	Yes	36133
ENSG00000105696	25789	TMEM59L	transmembrane protein 59 like	341.165	360.633	-1.05706	0.384302	No	219518
ENSG00000248909	---	---	---	6.07028	0.992264	6.1176	0.00545718	Yes	23226
ENSG00000103550	400506	KNOP1	lysine rich nucleolar protein 1	1546.03	1634.18	-1.05702	0.135349	No	892786
ENSG00000272076	---	---	---	7.00679	1.14986	6.09358	0.00360759	Yes	1829753
ENSG00000166813	374654	KIF7	kinesin family member 7	994.088	1050.7	-1.05695	0.208105	No	66199
ENSG00000164180	153396	TMEM161B	transmembrane protein 161B	1085.98	1147.79	-1.05692	0.174212	No	1510287
ENSG00000155903	5922	RASA2	RAS p21 protein activator 2	2876.91	3040.62	-1.05691	0.0464925	No	1489704
ENSG00000135049	23287	AGTPBP1	ATP/GTP binding carboxypeptidase 1	1028.92	1087.47	-1.0569	0.122818	No	9110
ENSG00000263345	---	---	---	10.1216	1.66628	6.07438	0.000303909	Yes	766228
ENSG00000163249	151195	CCNYL1	cyclin Y like 1	2682.47	2835.02	-1.05687	0.0422295	No	369180
ENSG00000170340	10678	B3GNT2	UDP-GlcNAc:betaGal beta-1,3-N-acetylglucosaminyltransferase 2	1286.64	1359.81	-1.05687	0.102149	No	2496979
ENSG00000251143	100128494	LOC100128494	uncharacterized LOC100128494	17.4038	18.3931	-1.05684	0.878322	No	786797
ENSG00000180764	266971	PIPSL	PIP5K1A and PSMD4 like (pseudogene)	207.453	219.243	-1.05683	0.48462	No	840836
ENSG00000265806	100422860	MIR4292	microRNA 4292	49.3389	52.1408	-1.05679	0.750328	No	669836
ENSG00000258465	---	---	---	2.98122	0.49294	6.04783	0.0107246	Yes	103173
ENSG00000057663	9474	ATG5	autophagy related 5	2849.99	3011.75	-1.05676	0.041945	No	65195
ENSG00000261925	---	---	---	3.84049	0.635669	6.04165	0.00926969	Yes	678559
ENSG00000104915	8677	STX10	syntaxin 10	2456.37	2595.76	-1.05674	0.0955266	No	942659
ENSG00000185838	54584	GNB1L	G protein subunit beta 1 like	309.195	326.718	-1.05667	0.391865	No	19810
ENSG00000126883	8021	NUP214	nucleoporin 214	4273.82	4515.71	-1.0566	0.0567904	No	346587
ENSG00000272896	---	---	---	6.79424	1.13273	5.99813	0.00599671	Yes	630258
ENSG00000100359	27352	SGSM3	small G protein signaling modulator 3	3267.62	3452.49	-1.05657	0.0364689	No	190606
ENSG00000171714	203859	ANO5	anoctamin 5	189.483	200.199	-1.05655	0.56909	No	2410805
ENSG00000169599	27247	NFU1	NFU1 iron-sulfur cluster scaffold	1538.14	1625.07	-1.05651	0.0799632	No	1197930
ENSG00000230184	---	---	---	3.93091	0.659354	5.96176	0.0126818	Yes	68498
ENSG00000077420	54518	APBB1IP	amyloid beta precursor protein binding family B member 1 interacting protein	1245.19	1315.51	-1.05647	0.12915	No	670561
ENSG00000138835	5998	RGS3	regulator of G protein signaling 3	6900.46	7290.11	-1.05647	0.0506796	No	642386
ENSG00000108509	23125	CAMTA2	calmodulin binding transcription activator 2	5137.57	5427.57	-1.05645	0.0337232	No	737681
ENSG00000188690	7390	UROS	uroporphyrinogen III synthase	4243.38	4482.79	-1.05642	0.0423195	No	481027
ENSG00000139921	81542	TMX1	thioredoxin related transmembrane protein 1	4885.5	5160.66	-1.05632	0.0415373	No	416339
ENSG00000200651	---	---	---	3.72189	0.635669	5.85507	0.00812495	Yes	290716
ENSG00000259585	---	---	---	2.88204	0.49294	5.84664	0.0116174	Yes	2478080
ENSG00000134910	3703	STT3A	STT3 oligosaccharyltransferase complex catalytic subunit A	13483.3	14239.4	-1.05608	0.0100885	No	267590
ENSG00000079785	1653	DDX1	DEAD-box helicase 1	9857.8	10410.2	-1.05603	0.0114494	No	309655
ENSG00000108604	6603	SMARCD2	SWI/SNF related, matrix associated, actin dependent regulator of chromatin, subfamily d, member 2	3773.64	3984.98	-1.056	0.0557615	No	499690
ENSG00000163386	---	---	---	15855.6	2719.98	5.82929	2.0883e-17	Yes	147127
ENSG00000215712	729515	TMEM242	transmembrane protein 242	1263.89	1334.56	-1.05591	0.113603	No	594697
ENSG00000107551	83937	RASSF4	Ras association domain family member 4	341.094	360.164	-1.05591	0.428698	No	3365025
ENSG00000136270	9238	TBRG4	transforming growth factor beta regulator 4	3735.26	3944.02	-1.05589	0.0780687	No	222720
ENSG00000140263	6652	SORD	sorbitol dehydrogenase	1434.62	1514.59	-1.05574	0.108629	No	552195
ENSG00000233926	101927502	TLE1-DT	TLE1 divergent transcript	1.46736	1.54907	-1.05568	0.95062	No	1363561
ENSG00000107874	79004	CUEDC2	CUE domain containing 2	6215.78	6561.06	-1.05555	0.0568351	No	455337
ENSG00000177051	23403	FBXO46	F-box protein 46	1177.64	1243.02	-1.05552	0.114136	No	315293
ENSG00000137845	102	ADAM10	ADAM metallopeptidase domain 10	9869.88	10417.5	-1.05548	0.0131933	No	189127
ENSG00000133422	22880	MORC2	MORC family CW-type zinc finger 2	3420.16	3609.78	-1.05544	0.055543	No	1251204
ENSG00000241781	---	---	---	2112.73	366.318	5.76749	8.00951e-10	Yes	179392
ENSG00000129347	65095	KRI1	KRI1 homolog	2450.89	2586.65	-1.05539	0.0813174	No	1186380
ENSG00000269867	---	---	---	3.65324	0.635669	5.74707	0.0142001	Yes	5796444
ENSG00000240219	---	---	---	2.83266	0.49294	5.74646	0.00797887	Yes	659675
ENSG00000125454	60386	SLC25A19	solute carrier family 25 member 19	418.8	441.993	-1.05538	0.330981	No	136823
ENSG00000130414	4705	NDUFA10	NADH:ubiquinone oxidoreductase subunit A10	5057.34	5336.88	-1.05528	0.0247957	No	338955
ENSG00000204650	147081	LINC02210	long intergenic non-protein coding RNA 2210	821.629	867.029	-1.05526	0.211299	No	54413
ENSG00000264546	---	---	---	2.81841	0.49294	5.71756	0.0298107	Yes	288425
ENSG00000236287	58486	ZBED5	zinc finger BED-type containing 5	816.115	861.203	-1.05525	0.161531	No	8312
ENSG00000259326	---	---	---	11.6915	2.04701	5.71149	0.000790574	Yes	1308258
ENSG00000127125	79717	PPCS	phosphopantothenoylcysteine synthetase	2382.65	2514.18	-1.0552	0.0995908	No	662133
ENSG00000167702	90990	KIFC2	kinesin family member C2	2596.91	2740.2	-1.05518	0.208049	No	858351
ENSG00000168274	---	---	---	42.6996	7.50578	5.6889	1.12822e-06	Yes	490327
ENSG00000250001	---	---	---	5.05803	0.889379	5.68715	0.019928	Yes	614594
ENSG00000213337	51239	ANKRD39	ankyrin repeat domain 39	388.558	409.997	-1.05517	0.434022	No	116210
ENSG00000259673	100506686	IQCH-AS1	IQCH antisense RNA 1	223.874	236.215	-1.05512	0.486574	No	176752
ENSG00000199459	---	---	---	2.79529	0.49294	5.67064	0.0351163	Yes	84124
ENSG00000106868	64420	SUSD1	sushi domain containing 1	1489	1571.01	-1.05508	0.149138	No	626461
ENSG00000233397	---	---	---	42.2882	7.4591	5.66935	6.37402e-06	Yes	2478004
ENSG00000266111	---	---	---	6.68077	1.17909	5.66604	0.00497143	Yes	446425
ENSG00000104320	4683	NBN	nibrin	5124.01	5405.73	-1.05498	0.020981	No	243663
ENSG00000240342	100130562	RPS2P5	ribosomal protein S2 pseudogene 5	18115.7	19109.9	-1.05488	0.0218531	No	98722
ENSG00000117148	81569	ACTL8	actin like 8	1.53538	1.61933	-1.05468	0.948476	No	1519614
ENSG00000185813	5833	PCYT2	phosphate cytidylyltransferase 2, ethanolamine	3893.77	4106.28	-1.05458	0.0489587	No	1081463
ENSG00000184779	---	---	---	94.6989	16.8537	5.61887	0.135583	No	1102220
ENSG00000258945	---	---	---	4.74605	0.845658	5.61226	0.0154419	Yes	3239611
ENSG00000217825	---	---	---	40.2186	7.16632	5.61218	1.35204e-06	Yes	492661
ENSG00000225092	---	---	---	8.26183	1.47268	5.61006	0.00148563	Yes	2301678
ENSG00000243609	---	---	---	4.42229	0.78899	5.605	0.0139282	Yes	81486
ENSG00000264895	---	---	---	2.76015	0.49294	5.59936	0.0140055	Yes	3999351
ENSG00000240520	---	---	---	5.19683	0.928311	5.59816	0.00560305	Yes	164690
ENSG00000160410	92799	SHKBP1	SH3KBP1 binding protein 1	4260.6	4493.07	-1.05456	0.0465082	No	484784
ENSG00000261291	---	---	---	3.68513	0.659354	5.58901	0.0140616	Yes	1441189
ENSG00000269873	---	---	---	3.54622	0.635669	5.57871	0.0187424	Yes	2366432
ENSG00000271789	---	---	---	27.1391	4.86562	5.57773	6.48123e-06	Yes	22282
ENSG00000151929	9531	BAG3	BAG cochaperone 3	11861.1	12508.3	-1.05456	0.0168152	No	652774
ENSG00000259799	---	---	---	3.53717	0.635669	5.56448	0.0150896	Yes	966878
ENSG00000107020	55848	PLGRKT	plasminogen receptor with a C-terminal lysine	1003.65	1058.2	-1.05436	0.234154	No	947221
ENSG00000260260	100507303	SNHG19	small nucleolar RNA host gene 19	650.043	685.343	-1.0543	0.402305	No	526414
ENSG00000125166	2806	GOT2	glutamic-oxaloacetic transaminase 2	11722.3	12358.7	-1.05428	0.0139172	No	215648
ENSG00000101246	10139	ARFRP1	ADP ribosylation factor related protein 1	2575.18	2714.6	-1.05414	0.0780284	No	405957
ENSG00000150456	221143	EEF1AKMT1	EEF1A lysine methyltransferase 1	420.543	443.281	-1.05407	0.304352	No	678777
ENSG00000049319	---	---	---	10.7025	1.93984	5.51723	0.00149957	Yes	191299
ENSG00000262803	---	---	---	2.71615	0.49294	5.51011	0.0384043	Yes	178543
ENSG00000182195	23641	LDOC1	LDOC1 regulator of NFKB signaling	2377.5	2506	-1.05405	0.0949332	No	42519
ENSG00000261239	---	---	---	2.70534	0.49294	5.48816	0.012184	Yes	2090757
ENSG00000258565	---	---	---	10.7866	1.97148	5.47131	0.00155202	Yes	34183
ENSG00000270190	---	---	---	3.88398	0.721921	5.38006	0.0648979	No	53131
ENSG00000167840	7775	ZNF232	zinc finger protein 232	160.8	169.49	-1.05404	0.55235	No	602230
ENSG00000137100	11258	DCTN3	dynactin subunit 3	3237.2	3412.09	-1.05403	0.0409454	No	582392
ENSG00000119616	51077	FCF1	FCF1 rRNA-processing protein	4163.8	4388.57	-1.05398	0.0454478	No	1807944
ENSG00000138434	6744	ITPRID2	ITPR interacting domain containing 2	16292.6	17169.8	-1.05384	0.0376397	No	162882
ENSG00000178026	388886	LRRC75B	leucine rich repeat containing 75B	50.884	53.6232	-1.05383	0.809041	No	188415
ENSG00000236348	388925	PSMC1P10	proteasome 26S subunit, ATPase 1 pseudogene 10	1.0473	1.10365	-1.05381	0.9552	No	1524844
ENSG00000022277	51507	RTF2	replication termination factor 2	5601.47	5902.71	-1.05378	0.0221079	No	1788594
ENSG00000155380	6566	SLC16A1	solute carrier family 16 member 1	7747.61	8164.12	-1.05376	0.0376984	No	1522460
ENSG00000129187	1635	DCTD	dCMP deaminase	7792.01	8210.49	-1.05371	0.0176777	No	602995
ENSG00000114544	54946	SLC41A3	solute carrier family 41 member 3	2353.89	2479.53	-1.05337	0.0659237	No	488152
ENSG00000204771	---	---	---	4.20213	0.879487	4.77794	0.160802	No	629634
ENSG00000134954	2113	ETS1	ETS proto-oncogene 1, transcription factor	12691.7	13368.4	-1.05332	0.0203773	No	570510
ENSG00000134744	23318	TUT4	terminal uridylyl transferase 4	2969.59	3127.73	-1.05325	0.0749673	No	18237
ENSG00000113658	4090	SMAD5	SMAD family member 5	6970.3	7341.23	-1.05322	0.0550338	No	613104
ENSG00000216316	---	---	---	4.36732	0.815476	5.35555	0.00775039	Yes	344906
ENSG00000271579	---	---	---	2.63954	0.49294	5.35469	0.0141501	Yes	950268
ENSG00000100316	6122	RPL3	ribosomal protein L3	78707.1	82892.2	-1.05317	0.00818996	No	351479
ENSG00000129493	25938	HEATR5A	HEAT repeat containing 5A	2071.25	2181.27	-1.05312	0.164969	No	731584
ENSG00000267263	---	---	---	6.14791	1.15009	5.3456	0.00969194	Yes	263757
ENSG00000262514	---	---	---	3.99648	0.748072	5.34237	0.0213731	Yes	2770064
ENSG00000034053	321	APBA2	amyloid beta precursor protein binding family A member 2	2157.53	2272.02	-1.05306	0.0818089	No	3983556
ENSG00000252949	---	---	---	2.62441	0.49294	5.32399	0.0140978	Yes	172171
ENSG00000271043	---	---	---	6.16774	1.16106	5.31217	0.00668829	Yes	166642
ENSG00000204323	643008	SMIM5	small integral membrane protein 5	2.69256	2.8354	-1.05305	0.94234	No	206615
ENSG00000167774	---	---	---	2.61558	0.49294	5.30608	0.0185119	Yes	1326632
ENSG00000187815	339559	ZFP69	ZFP69 zinc finger protein	124.232	130.814	-1.05298	0.631779	No	2641034
ENSG00000253218	---	---	---	3.3705	0.635669	5.30228	0.0139159	Yes	265833
ENSG00000122497	---	---	---	5802.27	1094.61	5.30077	3.36681e-18	Yes	218697
ENSG00000199366	---	---	---	2.60968	0.49294	5.29412	0.0148512	Yes	769398
ENSG00000117899	23184	MESD	mesoderm development LRP chaperone	5419.61	5706.14	-1.05287	0.0263331	No	123591
ENSG00000215861	---	---	---	237.62	45.0423	5.27548	3.49729e-11	Yes	756931
ENSG00000206601	106481314	RNU6-431P	RNA, U6 small nuclear 431, pseudogene	4.93902	5.20006	-1.05285	0.923238	No	450603
ENSG00000235848	---	---	---	10.6281	2.01725	5.26858	0.00311816	Yes	4179
ENSG00000126970	55906	ZC4H2	zinc finger C4H2-type containing	616.458	649.007	-1.0528	0.371495	No	733983
ENSG00000100802	60686	C14orf93	chromosome 14 open reading frame 93	312.56	329.052	-1.05276	0.464017	No	257440
ENSG00000267345	105372390	LOC105372390	uncharacterized LOC105372390	2.00059	2.10613	-1.05276	0.94234	No	760487
ENSG00000123411	64375	IKZF4	IKAROS family zinc finger 4	590.187	621.306	-1.05273	0.361871	No	384640
ENSG00000266980	---	---	---	2.87982	0.635669	4.53037	0.070769	No	393236
ENSG00000196535	399687	MYO18A	myosin XVIIIA	7190.44	7569.41	-1.0527	0.0410489	No	618083
ENSG00000256905	---	---	---	4.79925	0.91753	5.23062	0.0186311	Yes	91901
ENSG00000271734	---	---	---	11.0466	2.11241	5.22938	0.000738263	Yes	112487
ENSG00000176463	28232	SLCO3A1	solute carrier organic anion transporter family member 3A1	2043.5	2151.18	-1.05269	0.0926972	No	775098
ENSG00000245025	---	---	---	128.767	24.6423	5.22547	3.47945e-09	Yes	38602
ENSG00000075399	9605	VPS9D1	VPS9 domain containing 1	2167	2281.06	-1.05263	0.11719	No	591083
ENSG00000233010	---	---	---	2.57356	0.49294	5.22084	0.0185341	Yes	943348
ENSG00000197933	55552	ZNF823	zinc finger protein 823	243.901	256.737	-1.05263	0.463596	No	13269
ENSG00000230882	---	---	---	19.413	3.72615	5.20994	0.000221332	Yes	46630
ENSG00000258620	---	---	---	3.30712	0.635669	5.20258	0.0160105	Yes	1994163
ENSG00000168016	9881	TRANK1	tetratricopeptide repeat and ankyrin repeat containing 1	364.002	383.145	-1.05259	0.453283	No	689000
ENSG00000237481	---	---	---	5.45449	1.04942	5.19762	0.0129125	Yes	416852
ENSG00000061987	23041	MON2	MON2 homolog, regulator of endosome-to-Golgi trafficking	3243.24	3413.51	-1.0525	0.0727718	No	771184
ENSG00000254251	---	---	---	2.55332	0.49294	5.17979	0.0188772	Yes	336289
ENSG00000260899	---	---	---	20.4185	3.94778	5.17215	0.000159818	Yes	309849
ENSG00000124529	---	---	---	5.14617	0.994984	5.17211	0.0123991	Yes	680013
ENSG00000187735	6917	TCEA1	transcription elongation factor A1	6595.35	6941.3	-1.05245	0.0301454	No	381634
ENSG00000217783	---	---	---	2.54639	0.49294	5.16571	0.0186729	Yes	618172
ENSG00000100614	5494	PPM1A	protein phosphatase, Mg2+/Mn2+ dependent 1A	3786.39	3984.76	-1.05239	0.0464738	No	179139
ENSG00000168395	84289	ING5	inhibitor of growth family member 5	1527.79	1607.79	-1.05236	0.100544	No	529781
ENSG00000270072	---	---	---	2.53988	0.49294	5.15251	0.0363824	Yes	518471
ENSG00000147604	6129	RPL7	ribosomal protein L7	30017	31586.8	-1.0523	0.0139172	No	428917
ENSG00000267587	---	---	---	3.27224	0.635669	5.1477	0.013454	Yes	1368230
ENSG00000251003	---	---	---	633.511	123.078	5.14722	4.37379e-13	Yes	5949429
ENSG00000259479	653381	SORD2P	sorbitol dehydrogenase 2, pseudogene	67.6667	71.1988	-1.0522	0.709248	No	413784
ENSG00000225273	---	---	---	2.53192	0.49294	5.13636	0.0196006	Yes	924609
ENSG00000165487	221154	MICU2	mitochondrial calcium uptake 2	3824.73	4023.95	-1.05209	0.0466067	No	133034
ENSG00000131844	64087	MCCC2	methylcrotonyl-CoA carboxylase subunit 2	2784.35	2929.24	-1.05204	0.0657886	No	1458318
ENSG00000199630	---	---	---	2.52903	0.49294	5.1305	0.0192126	Yes	527297
ENSG00000226253	---	---	---	3.26032	0.635669	5.12896	0.0291633	Yes	265363
ENSG00000130640	10844	TUBGCP2	tubulin gamma complex associated protein 2	9509.01	10003.7	-1.05202	0.0311794	No	618815
ENSG00000095752	3589	IL11	interleukin 11	1938.78	2039.47	-1.05193	0.178539	No	3298735
ENSG00000009307	7812	CSDE1	cold shock domain containing E1	45284.4	47634.3	-1.05189	0.00921528	No	278597
ENSG00000267798	---	---	---	8.83652	1.73002	5.10775	0.00230492	Yes	4379904
ENSG00000135624	10574	CCT7	chaperonin containing TCP1 subunit 7	19896.2	20927.6	-1.05183	0.0121318	No	423850
ENSG00000272017	---	---	---	21.342	4.18191	5.1034	0.000812141	Yes	1757450
ENSG00000158079	138639	PTPDC1	protein tyrosine phosphatase domain containing 1	521.896	548.917	-1.05177	0.324955	No	244182
ENSG00000138463	84925	SLC49A4	solute carrier family 49 member 4	1253.87	1318.57	-1.0516	0.201794	No	472183
ENSG00000207110	106481624	RNVU1-32	RNA, variant U1 small nuclear 32	8.95292	9.41482	-1.05159	0.904215	No	1716877
ENSG00000101346	23509	POFUT1	protein O-fucosyltransferase 1	8329.7	8759.44	-1.05159	0.0224307	No	2993202
ENSG00000198231	11325	DDX42	DEAD-box helicase 42	9342.48	9824.02	-1.05154	0.0301655	No	430229
ENSG00000102471	54602	NDFIP2	Nedd4 family interacting protein 2	4339.07	4562.66	-1.05153	0.0368127	No	365649
ENSG00000237978	---	---	---	11.686	2.30801	5.06323	0.000613695	Yes	496925
ENSG00000254539	---	---	---	122.515	24.231	5.0561	2.16836e-08	Yes	601033
ENSG00000261072	---	---	---	2.18303	0.49294	4.42859	0.0558047	No	66528
ENSG00000261606	---	---	---	2.48827	0.49294	5.04781	0.0223631	Yes	269329
ENSG00000254194	---	---	---	2.48827	0.49294	5.04781	0.0223631	Yes	3911665
ENSG00000258486	---	---	---	1234.45	245.104	5.03643	2.38877e-11	Yes	230295
ENSG00000188428	63915	BLOC1S5	biogenesis of lysosomal organelles complex 1 subunit 5	766.375	805.844	-1.0515	0.277898	No	1905398
ENSG00000148429	9712	USP6NL	USP6 N-terminal like	1647.85	1732.39	-1.0513	0.182929	No	1675127
ENSG00000227018	---	---	---	3.18788	0.635669	5.01499	0.0211087	Yes	89088
ENSG00000176986	9632	SEC24C	SEC24 homolog C, COPII coat complex component	15039.5	15809.9	-1.05123	0.0196503	No	1048585
ENSG00000229992	---	---	---	3.82985	0.765225	5.00486	0.0225207	Yes	79782
ENSG00000115504	23301	EHBP1	EH domain binding protein 1	3653.34	3840.4	-1.0512	0.0648954	No	2019241
ENSG00000265801	---	---	---	2.46448	0.49294	4.99956	0.0237449	Yes	2333374
ENSG00000160679	26097	CHTOP	chromatin target of PRMT1	4908.42	5159.24	-1.0511	0.0475107	No	3603782
ENSG00000213862	644029	RPL7AP62	ribosomal protein L7a pseudogene 62	554.118	582.429	-1.05109	0.381096	No	3260024
ENSG00000211683	---	---	---	3.17381	0.635669	4.99286	0.0218828	Yes	209860
ENSG00000136942	11224	RPL35	ribosomal protein L35	22959.9	24132.1	-1.05105	0.0178181	No	35040
ENSG00000124523	23408	SIRT5	sirtuin 5	706.624	742.7	-1.05105	0.285456	No	244963
ENSG00000156642	27020	NPTN	neuroplastin	9401.4	9880.79	-1.05099	0.0198143	No	521522
ENSG00000261879	100130950	ZNF594-DT	ZNF594 divergent transcript	53.2526	55.9676	-1.05098	0.729742	No	533261
ENSG00000234835	---	---	---	4.37327	0.879487	4.97252	0.0102116	Yes	3614486
ENSG00000116141	4139	MARK1	microtubule affinity regulating kinase 1	341.763	359.184	-1.05097	0.436881	No	141736
ENSG00000178662	80034	CSRNP3	cysteine and serine rich nuclear protein 3	326.019	342.623	-1.05093	0.478993	No	1510595
ENSG00000168781	9677	PPIP5K1	diphosphoinositol pentakisphosphate kinase 1	673.997	708.231	-1.05079	0.30782	No	706262
ENSG00000225933	---	---	---	3.15464	0.635669	4.9627	0.02523	Yes	331005
ENSG00000157654	445815	PALM2AKAP2	PALM2 and AKAP2 fusion	74.1691	77.9356	-1.05078	0.758609	No	57004
ENSG00000226056	---	---	---	2.44311	0.49294	4.9562	0.029242	Yes	380441
ENSG00000077097	7155	TOP2B	DNA topoisomerase II beta	11723.6	12318.8	-1.05077	0.0307685	No	723583
ENSG00000168264	359948	IRF2BP2	interferon regulatory factor 2 binding protein 2	7203.88	7569.6	-1.05077	0.0370926	No	339867
ENSG00000266994	---	---	---	5.13085	1.03704	4.94758	0.0280668	Yes	174271
ENSG00000157216	23648	SSBP3	single stranded DNA binding protein 3	995.164	1045.67	-1.05076	0.274583	No	769914
ENSG00000224023	399821	EDRF1-DT	EDRF1 divergent transcript	49.0649	51.5542	-1.05074	0.767698	No	584709
ENSG00000224885	---	---	---	3.25443	0.659354	4.93578	0.0136019	Yes	5042438
ENSG00000265150	---	---	---	876.48	177.659	4.93349	7.35309e-10	Yes	45454
ENSG00000168778	79867	TCTN2	tectonic family member 2	1311.3	1377.72	-1.05065	0.147911	No	801436
ENSG00000101307	10326	SIRPB1	signal regulatory protein beta 1	98.9423	103.954	-1.05065	0.706024	No	122306
ENSG00000215301	1654	DDX3X	DEAD-box helicase 3 X-linked	37458.4	39353.8	-1.0506	0.0101447	No	1395946
ENSG00000129596	1036	CDO1	cysteine dioxygenase type 1	120.729	126.833	-1.05056	0.672314	No	3638699
ENSG00000023041	64429	ZDHHC6	zinc finger DHHC-type palmitoyltransferase 6	4662.58	4898.31	-1.05056	0.0502473	No	1316218
ENSG00000238261	---	---	---	4.31414	0.879487	4.90529	0.0171948	Yes	2059618
ENSG00000253463	100419979	HMGB1P19	high mobility group box 1 pseudogene 19	2.25195	2.36573	-1.05052	0.944914	No	183265
ENSG00000196653	91392	ZNF502	zinc finger protein 502	61.7886	64.9094	-1.05051	0.73437	No	1076484
ENSG00000267898	---	---	---	11.916	2.43353	4.89658	0.00131839	Yes	305327
ENSG00000188493	284325	C19orf54	chromosome 19 open reading frame 54	514.099	540.016	-1.05041	0.310272	No	659484
ENSG00000251435	---	---	---	2.41063	0.49294	4.89031	0.0349259	Yes	205708
ENSG00000170379	285966	TCAF2	TRPM8 channel associated factor 2	86.7935	91.1524	-1.05022	0.699858	No	3309400
ENSG00000105948	79989	TTC26	tetratricopeptide repeat domain 26	770.548	809.234	-1.05021	0.235102	No	275541
ENSG00000141391	10650	PRELID3A	PRELI domain containing 3A	406.694	427.039	-1.05003	0.422759	No	134039
ENSG00000129675	9459	ARHGEF6	Rac/Cdc42 guanine nucleotide exchange factor 6	1221.37	1281.98	-1.04963	0.20114	No	753117
ENSG00000236833	---	---	---	2.40418	0.49294	4.87722	0.0275084	Yes	57045
ENSG00000189319	9679	FAM53B	family with sequence similarity 53 member B	2101.82	2206.07	-1.0496	0.122966	No	1560006
ENSG00000261729	105371653	GS1-204I12.4	uncharacterized GS1-204I12.4	1.30993	1.37489	-1.04959	0.956748	No	393404
ENSG00000164347	84340	GFM2	GTP dependent ribosome recycling factor mitochondrial 2	2886.46	3028.9	-1.04935	0.0933542	No	532670
ENSG00000178694	63899	NSUN3	NOP2/Sun RNA methyltransferase 3	612.163	642.208	-1.04908	0.339138	No	3154323
ENSG00000256083	---	---	---	8.74105	1.80754	4.83589	0.00666804	Yes	134582
ENSG00000235683	---	---	---	2.38285	0.49294	4.83396	0.0410531	Yes	132397
ENSG00000272733	---	---	---	2.38193	0.49294	4.8321	0.043067	Yes	154778
ENSG00000213036	---	---	---	3.18016	0.659354	4.82314	0.0170653	Yes	301545
ENSG00000143179	7371	UCK2	uridine-cytidine kinase 2	4511.86	4733.25	-1.04907	0.0480325	No	730449
ENSG00000151572	121601	ANO4	anoctamin 4	2.55426	2.67955	-1.04905	0.953577	No	1583998
ENSG00000262402	---	---	---	4.06547	0.845658	4.80747	0.0157675	Yes	1017630
ENSG00000170889	6203	RPS9	ribosomal protein S9	24274.7	25465.4	-1.04905	0.0192103	No	2121515
ENSG00000204793	---	---	---	6.98963	1.4572	4.79662	0.010172	Yes	508420
ENSG00000186594	84981	MIR22HG	MIR22 host gene	1853.18	1944.06	-1.04904	0.266943	No	1401981
ENSG00000198242	6147	RPL23A	ribosomal protein L23a	24662.8	25868.5	-1.04888	0.0373163	No	1079101
ENSG00000085741	7481	WNT11	Wnt family member 11	13.6586	14.3255	-1.04883	0.883436	No	278933
ENSG00000180221	---	---	---	2.16552	0.49294	4.39306	0.0578134	No	1694940
ENSG00000111707	64426	SUDS3	SDS3 homolog, SIN3A corepressor complex component	3557.36	3730.58	-1.04869	0.0660542	No	31043
ENSG00000233858	---	---	---	3.65451	0.765225	4.77573	0.0234624	Yes	569723
ENSG00000269483	---	---	---	2.3476	0.49294	4.76245	0.030795	Yes	46456
ENSG00000037897	4234	METTL1	methyltransferase 1, tRNA methylguanosine	968.178	1015.29	-1.04866	0.228364	No	197180
ENSG00000162384	54987	CZIB	CXXC motif containing zinc binding protein	1884.06	1975.65	-1.04861	0.120828	No	388281
ENSG00000168785	10098	TSPAN5	tetraspanin 5	7162.77	7510.45	-1.04854	0.0399517	No	396209
ENSG00000201047	---	---	---	2.33911	0.49294	4.74521	0.0465803	Yes	543596
ENSG00000225334	---	---	---	2.33454	0.49294	4.73596	0.0396983	Yes	289701
ENSG00000087274	118	ADD1	adducin 1	18577.2	19476.5	-1.04841	0.0217568	No	1252299
ENSG00000237280	---	---	---	3.9945	0.845658	4.72354	0.0141712	Yes	680534
ENSG00000074071	65993	MRPS34	mitochondrial ribosomal protein S34	4767.23	4997.75	-1.04836	0.13584	No	156953
ENSG00000259402	---	---	---	3.98898	0.848633	4.70048	0.0218205	Yes	123832
ENSG00000235261	---	---	---	2.31631	0.49294	4.69896	0.0321496	Yes	1056432
ENSG00000256588	---	---	---	3.09324	0.659354	4.69132	0.015484	Yes	889231
ENSG00000256056	---	---	---	2.30789	0.49294	4.68188	0.046931	Yes	603297
ENSG00000261056	---	---	---	25.7442	5.49943	4.68125	3.87229e-05	Yes	1570891
ENSG00000213368	---	---	---	6.22034	1.32891	4.68079	0.0110176	Yes	436293
ENSG00000100916	84312	BRMS1L	BRMS1 like transcriptional repressor	1119.22	1173.32	-1.04833	0.279191	No	227264
ENSG00000272375	---	---	---	5.12897	1.09838	4.66958	0.0130551	Yes	3267788
ENSG00000185684	347918	EP400P1	EP400 pseudogene 1	297.094	311.445	-1.0483	0.504832	No	292910
ENSG00000116151	79906	MORN1	MORN repeat containing 1	299.561	314.025	-1.04828	0.505197	No	27417
ENSG00000260432	---	---	---	643.964	138.043	4.66496	1.31186e-12	Yes	117728
ENSG00000264584	---	---	---	3.96323	0.850438	4.66022	0.0261405	Yes	539001
ENSG00000068305	4205	MEF2A	myocyte enhancer factor 2A	6949.96	7285.47	-1.04827	0.140446	No	163953
ENSG00000078043	9063	PIAS2	protein inhibitor of activated STAT 2	1249.92	1310.12	-1.04816	0.188621	No	1434508
ENSG00000257475	---	---	---	5.73505	1.23286	4.65183	0.00864387	Yes	624519
ENSG00000133466	114904	C1QTNF6	C1q and TNF related 6	480.926	504.054	-1.04809	0.438092	No	12559
ENSG00000226958	---	---	---	74.052	15.9884	4.63161	1.31686e-05	Yes	173492
ENSG00000226785	---	---	---	2.94082	0.635669	4.62633	0.0248056	Yes	1467094
ENSG00000110888	65981	CAPRIN2	caprin family member 2	3714.76	3893.31	-1.04807	0.0677452	No	782503
ENSG00000256234	---	---	---	7.28773	1.57929	4.61457	0.00783921	Yes	1861480
ENSG00000221159	---	---	---	2.15898	0.49294	4.3798	0.0533009	No	332080
ENSG00000236457	---	---	---	2.15752	0.49294	4.37685	0.0573638	No	929519
ENSG00000102683	6445	SGCG	sarcoglycan gamma	1.13539	1.18992	-1.04802	0.961041	No	1709773
ENSG00000228972	---	---	---	2.08304	0.49294	4.22575	0.0718377	No	427965
ENSG00000261529	---	---	---	4.55234	0.995177	4.5744	0.0218326	Yes	2688774
ENSG00000141040	57336	ZNF287	zinc finger protein 287	585.646	613.745	-1.04798	0.372995	No	790643
ENSG00000207370	---	---	---	4.67953	1.025	4.5654	0.0142465	Yes	2424527
ENSG00000238280	---	---	---	20.7645	4.55427	4.55935	0.000268762	Yes	198833
ENSG00000144028	23020	SNRNP200	small nuclear ribonucleoprotein U5 subunit 200	15100.4	15823.1	-1.04785	0.0366848	No	668745
ENSG00000128203	57168	ASPHD2	aspartate beta-hydroxylase domain containing 2	327.399	343.063	-1.04784	0.483528	No	826163
ENSG00000163634	80145	THOC7	THO complex subunit 7	3395.29	3556.75	-1.04755	0.0943476	No	725323
ENSG00000255097	---	---	---	2.08289	0.49294	4.22545	0.0790093	No	298522
ENSG00000213362	---	---	---	25.0841	5.53712	4.53017	0.000196824	Yes	80613
ENSG00000235508	86781	RPS2P7	ribosomal protein S2 pseudogene 7	581.161	608.782	-1.04753	0.358044	No	4663747
ENSG00000238197	100506215	PAXBP1-AS1	PAXBP1 antisense RNA 1	39.7489	41.6379	-1.04752	0.806061	No	399859
ENSG00000255864	---	---	---	4.72489	1.04942	4.50239	0.0217872	Yes	2177585
ENSG00000221994	57232	ZNF630	zinc finger protein 630	105.273	110.272	-1.04749	0.663539	No	628771
ENSG00000188227	390927	ZNF793	zinc finger protein 793	115.593	121.071	-1.04739	0.710987	No	332152
ENSG00000255465	---	---	---	3.44224	0.765225	4.49833	0.044211	Yes	536262
ENSG00000166200	9318	COPS2	COP9 signalosome subunit 2	6833.55	7157.36	-1.04739	0.0667988	No	2265362
ENSG00000145014	93109	TMEM44	transmembrane protein 44	2001.15	2095.92	-1.04736	0.156879	No	1412088
ENSG00000260723	---	---	---	2.215	0.49294	4.49344	0.0438405	Yes	1203512
ENSG00000123739	81579	PLA2G12A	phospholipase A2 group XIIA	2757.12	2887.61	-1.04733	0.201908	No	247885
ENSG00000255414	---	---	---	2.64852	0.635669	4.16651	0.101431	No	2404091
ENSG00000123066	23389	MED13L	mediator complex subunit 13L	4045.05	4236.17	-1.04725	0.160971	No	2913
ENSG00000230732	---	---	---	9.07186	2.02543	4.47899	0.0059554	Yes	809851
ENSG00000254981	---	---	---	15.932	3.5582	4.47755	0.000442639	Yes	479771
ENSG00000253507	---	---	---	2.83003	0.635669	4.45205	0.0343291	Yes	1592241
ENSG00000260784	---	---	---	6.58292	1.48225	4.44117	0.0109378	Yes	2304903
ENSG00000140988	6187	RPS2	ribosomal protein S2	54614.9	57191.7	-1.04718	0.0323126	No	348658
ENSG00000251413	---	---	---	2.73239	0.659354	4.14405	0.0717969	No	16087
ENSG00000156858	78994	PRR14	proline rich 14	2477.97	2594.76	-1.04713	0.157137	No	219899
ENSG00000272175	---	---	---	2.88761	0.703539	4.10441	0.0541454	No	514583
ENSG00000013523	23357	ANGEL1	angel homolog 1	1093.63	1145.14	-1.0471	0.278383	No	304246
ENSG00000170632	83787	ARMC10	armadillo repeat containing 10	1771.4	1854.79	-1.04708	0.15606	No	748160
ENSG00000228470	---	---	---	4.06501	0.918809	4.42422	0.0199354	Yes	175773
ENSG00000114353	2771	GNAI2	G protein subunit alpha i2	29670	31063.4	-1.04697	0.0292112	No	784041
ENSG00000175390	8665	EIF3F	eukaryotic translation initiation factor 3 subunit F	11584.4	12128.4	-1.04695	0.0278564	No	981079
ENSG00000220693	---	---	---	4.80646	1.08839	4.41614	0.0252558	Yes	136188
ENSG00000230914	---	---	---	2.80394	0.635669	4.411	0.0392997	Yes	458759
ENSG00000161654	124801	LSM12	LSM12 homolog	1211.02	1267.62	-1.04674	0.206103	No	397584
ENSG00000096968	3717	JAK2	Janus kinase 2	1094.36	1145.49	-1.04672	0.240943	No	1400065
ENSG00000259398	---	---	---	1.96094	0.49294	3.97806	0.0850954	No	131924
ENSG00000227407	---	---	---	4.13648	1.05047	3.93773	0.0543647	No	2362782
ENSG00000162627	51375	SNX7	sorting nexin 7	3557.43	3723.57	-1.0467	0.0883386	No	1424611
ENSG00000272627	---	---	---	2.50156	0.635669	3.93531	0.0853914	No	227562
ENSG00000230001	---	---	---	3.72673	0.850438	4.38213	0.0266023	Yes	1759470
ENSG00000261611	---	---	---	3.31477	0.845658	3.91976	0.0576962	No	60540
ENSG00000237646	---	---	---	2.88761	0.659354	4.37946	0.0356756	Yes	160666
ENSG00000256571	---	---	---	4.82803	1.10244	4.37942	0.0150941	Yes	640308
ENSG00000218596	---	---	---	2.41361	0.635669	3.79696	0.0633654	No	651336
ENSG00000256128	---	---	---	2.98827	0.78899	3.78747	0.0875219	No	1404446
ENSG00000114942	1933	EEF1B2	eukaryotic translation elongation factor 1 beta 2	18103.2	18948.3	-1.04669	0.0451239	No	320959
ENSG00000257595	105369984	LINC02356	long intergenic non-protein coding RNA 2356	0.820049	0.858325	-1.04667	0.966138	No	20601
ENSG00000124160	57727	NCOA5	nuclear receptor coactivator 5	3619.22	3788	-1.04663	0.0887402	No	5112329
ENSG00000174206	144577	KICS2	KICSTOR subunit 2	279.299	292.306	-1.04657	0.569892	No	983816
ENSG00000261915	---	---	---	18.2208	4.18559	4.35322	0.000315728	Yes	604251
ENSG00000076258	2329	FMO4	flavin containing dimethylaniline monoxygenase 4	60.7832	63.6129	-1.04655	0.768674	No	61239
ENSG00000232034	---	---	---	11.2742	2.5962	4.34257	0.0107662	Yes	93340
ENSG00000204933	---	---	---	2.76029	0.635669	4.34233	0.0489728	Yes	132814
ENSG00000253557	---	---	---	8.45873	1.95475	4.32727	0.00546239	Yes	1656338
ENSG00000272486	---	---	---	3.89781	1.03488	3.76645	0.0543674	No	1272604
ENSG00000233218	---	---	---	3.11644	0.721921	4.31687	0.026053	Yes	2747975
ENSG00000249091	---	---	---	3.63136	0.84333	4.30598	0.0407096	Yes	74926
ENSG00000187990	---	---	---	17.5818	4.08642	4.3025	0.0012037	Yes	490621
ENSG00000250397	---	---	---	10.0691	2.34284	4.29783	0.0019487	Yes	185101
ENSG00000121481	6045	RNF2	ring finger protein 2	1468.8	1537.03	-1.04645	0.157945	No	62895
ENSG00000232637	---	---	---	1324.97	308.93	4.28889	6.00561e-12	Yes	226766
ENSG00000112339	10767	HBS1L	HBS1 like translational GTPase	5845.46	6116.52	-1.04637	0.0601448	No	257621
ENSG00000221077	---	---	---	2.82761	0.659354	4.28846	0.0243373	Yes	1497165
ENSG00000116459	515	ATP5PB	ATP synthase peripheral stalk-membrane subunit b	9694.24	10143.3	-1.04633	0.0332697	No	448838
ENSG00000172795	167227	DCP2	decapping mRNA 2	2319.89	2427.33	-1.04631	0.195574	No	798448
ENSG00000172037	3913	LAMB2	laminin subunit beta 2	18261.1	19106	-1.04627	0.0426699	No	766603
ENSG00000166669	80063	ATF7IP2	activating transcription factor 7 interacting protein 2	245.778	257.149	-1.04626	0.519454	No	35489
ENSG00000273245	---	---	---	5.27778	1.23286	4.28092	0.0190891	Yes	941214
ENSG00000205133	286144	TRIQK	triple QxxK/R motif containing	1383.83	1447.82	-1.04624	0.155646	No	159736
ENSG00000258337	---	---	---	1.81891	0.49294	3.68993	0.107635	No	69681
ENSG00000227778	---	---	---	2.42415	0.659354	3.67655	0.0648501	No	253604
ENSG00000214174	201283	AMZ2P1	AMZ2 pseudogene 1	399.628	418.079	-1.04617	0.384881	No	54279
ENSG00000160094	149076	ZNF362	zinc finger protein 362	786.303	822.59	-1.04615	0.307679	No	149791
ENSG00000176410	84277	DNAJC30	DnaJ heat shock protein family (Hsp40) member C30	1281.68	1340.64	-1.046	0.221225	No	256052
ENSG00000137992	1629	DBT	dihydrolipoamide branched chain transacylase E2	1431.38	1497.18	-1.04596	0.321968	No	163065
ENSG00000131069	55902	ACSS2	acyl-CoA synthetase short chain family member 2	1815.35	1898.7	-1.04591	0.126905	No	328936
ENSG00000231272	---	---	---	1.81139	0.49294	3.67466	0.10795	No	687685
ENSG00000249140	---	---	---	3.06918	0.848633	3.61661	0.0733426	No	534776
ENSG00000214389	644972	RPS3AP26	RPS3A pseudogene 26	2199.41	2300.34	-1.04589	0.175066	No	120974
ENSG00000254938	---	---	---	4.31507	1.02843	4.19578	0.0346937	Yes	1080861
ENSG00000155959	7411	VBP1	VHL binding protein 1	3893.36	4071.9	-1.04586	0.0757104	No	327975
ENSG00000255655	---	---	---	7.53384	1.79814	4.18979	0.0106783	Yes	527891
ENSG00000155189	55326	AGPAT5	1-acylglycerol-3-phosphate O-acyltransferase 5	3943.04	4123.76	-1.04583	0.134316	No	725027
ENSG00000218980	---	---	---	2.73874	0.765225	3.579	0.114014	No	5987806
ENSG00000246250	---	---	---	3.53717	0.995177	3.55431	0.052729	No	19106
ENSG00000267328	---	---	---	13.112	3.15002	4.16252	0.00144384	Yes	1771333
ENSG00000256843	---	---	---	3.69918	0.888804	4.16197	0.0304347	Yes	210404
ENSG00000268182	147670	SMIM17	small integral membrane protein 17	6.68552	6.99183	-1.04582	0.927888	No	4571418
ENSG00000036257	8452	CUL3	cullin 3	6889.71	7203.47	-1.04554	0.0560667	No	97819
ENSG00000151612	152485	ZNF827	zinc finger protein 827	2726.29	2850.25	-1.04547	0.192772	No	413211
ENSG00000168260	---	---	---	5.38141	1.29619	4.15172	0.0110905	Yes	275248
ENSG00000230300	---	---	---	3.2379	0.917194	3.53022	0.0724135	No	1527824
ENSG00000142733	9064	MAP3K6	mitogen-activated protein kinase kinase kinase 6	2083.05	2177.61	-1.04539	0.117481	No	668263
ENSG00000234465	390940	PINLYP	phospholipase A2 inhibitor and LY6/PLAUR domain containing	304.038	317.827	-1.04535	0.539891	No	330491
ENSG00000236095	---	---	---	4.9161	1.18992	4.13147	0.0192695	Yes	8793
ENSG00000134864	87769	GGACT	gamma-glutamylamine cyclotransferase	22.2623	23.2713	-1.04532	0.856446	No	340992
ENSG00000142235	114783	LMTK3	lemur tyrosine kinase 3	170.438	178.141	-1.0452	0.624009	No	756114
ENSG00000273487	---	---	---	3.89114	1.10365	3.5257	0.0562995	No	538174
ENSG00000235209	---	---	---	2.24003	0.635669	3.5239	0.152766	No	750640
ENSG00000260729	---	---	---	18.4939	4.50035	4.10944	0.000504034	Yes	51659
ENSG00000055044	51602	NOP58	NOP58 ribonucleoprotein	5387	5630.4	-1.04518	0.0619461	No	251275
ENSG00000259682	---	---	---	2.47871	0.703539	3.5232	0.0744492	No	506553
ENSG00000227067	---	---	---	2.70534	0.659354	4.10301	0.0330789	Yes	66365
ENSG00000243721	---	---	---	3.48093	0.848633	4.1018	0.0335448	Yes	142366
ENSG00000229989	---	---	---	66.7871	16.3082	4.09531	9.10289e-07	Yes	1790075
ENSG00000124615	4337	MOCS1	molybdenum cofactor synthesis 1	950.821	993.729	-1.04513	0.211723	No	477641
ENSG00000130699	6874	TAF4	TATA-box binding protein associated factor 4	1072.87	1121.1	-1.04495	0.270915	No	1292061
ENSG00000271795	---	---	---	8.80899	2.15357	4.09041	0.0208603	Yes	569234
ENSG00000261375	---	---	---	17.4528	4.27494	4.08258	0.000841375	Yes	329399
ENSG00000143252	6391	SDHC	succinate dehydrogenase complex subunit C	3386.88	3539.08	-1.04494	0.115347	No	419494
ENSG00000225975	101927621	ZNF567-DT	ZNF567 divergent transcript	33.6542	35.1639	-1.04486	0.826619	No	1151643
ENSG00000178917	285346	ZNF852	zinc finger protein 852	163.01	170.318	-1.04483	0.603821	No	1157444
ENSG00000257875	---	---	---	4.19511	1.03031	4.0717	0.0230569	Yes	2730070
ENSG00000184730	55911	APOBR	apolipoprotein B receptor	8.08879	8.45098	-1.04478	0.924687	No	97292
ENSG00000154930	84532	ACSS1	acyl-CoA synthetase short chain family member 1	3.99013	4.16876	-1.04477	0.938913	No	649103
ENSG00000138138	84896	ATAD1	ATPase family AAA domain containing 1	5399.13	5640.82	-1.04476	0.121497	No	555178
ENSG00000179603	2918	GRM8	glutamate metabotropic receptor 8	6.45044	6.73898	-1.04473	0.941046	No	1302062
ENSG00000109180	54940	OCIAD1	OCIA domain containing 1	7085.71	7402.66	-1.04473	0.0740489	No	4241185
ENSG00000245937	644873	SLC12A2-DT	SLC12A2 divergent transcript	1047.18	1094	-1.04471	0.23957	No	14026
ENSG00000196632	65267	WNK3	WNK lysine deficient protein kinase 3	493.623	515.679	-1.04468	0.499542	No	211682
ENSG00000227869	---	---	---	6.74484	1.66628	4.04784	0.00439599	Yes	1941030
ENSG00000229109	---	---	---	14.1209	3.4922	4.04356	0.00230556	Yes	165543
ENSG00000174720	51574	LARP7	La ribonucleoprotein 7, transcriptional regulator	3210.85	3354.17	-1.04464	0.122476	No	158164
ENSG00000115866	1615	DARS1	aspartyl-tRNA synthetase 1	5125.09	5353.72	-1.04461	0.104138	No	4080548
ENSG00000109534	54433	GAR1	GAR1 ribonucleoprotein	2308.86	2411.85	-1.04461	0.211318	No	162451
ENSG00000204818	---	---	---	4.87451	1.3875	3.51316	0.0876714	No	1936793
ENSG00000232693	---	---	---	5.64574	1.40455	4.01962	0.0203764	Yes	687140
ENSG00000231549	---	---	---	2.6441	0.659354	4.01014	0.0476514	Yes	246334
ENSG00000116299	57535	ELAPOR1	endosome-lysosome associated apoptosis and autophagy regulator 1	65.8467	68.7838	-1.04461	0.771352	No	622183
ENSG00000128394	200316	APOBEC3F	apolipoprotein B mRNA editing enzyme catalytic subunit 3F	92.4666	96.5867	-1.04456	0.716707	No	631263
ENSG00000248884	---	---	---	2.545	0.635669	4.00366	0.0490843	Yes	1887456
ENSG00000255168	---	---	---	31.3708	7.84071	4.00102	0.000121102	Yes	227754
ENSG00000236404	401491	VLDLR-AS1	VLDLR antisense RNA 1	13.7416	14.3532	-1.04451	0.895541	No	328981
ENSG00000260367	---	---	---	4.39274	1.09931	3.99591	0.037343	Yes	260268
ENSG00000136897	54534	MRPL50	mitochondrial ribosomal protein L50	1540.07	1608.52	-1.04445	0.172308	No	292245
ENSG00000198042	84549	MAK16	MAK16 homolog	2495.42	2606.01	-1.04432	0.11513	No	4436509
ENSG00000238403	---	---	---	2.30515	0.659354	3.49608	0.10234	No	410421
ENSG00000226539	---	---	---	2.215	0.635669	3.48451	0.0985766	No	782453
ENSG00000160803	56893	UBQLN4	ubiquilin 4	3814.92	3983.62	-1.04422	0.179645	No	2184596
ENSG00000238259	---	---	---	3.49221	0.879487	3.97074	0.033618	Yes	1251570
ENSG00000008988	6224	RPS20	ribosomal protein S20	27658.5	28880.5	-1.04418	0.0716548	No	53043
ENSG00000136193	9805	SCRN1	secernin 1	22113.6	23088.7	-1.04409	0.0328407	No	501091
ENSG00000135521	84946	LTV1	LTV1 ribosome biogenesis factor	2727.14	2847.14	-1.044	0.161881	No	201660
ENSG00000124120	79183	TTPAL	alpha tocopherol transfer protein like	3904.27	4075.75	-1.04392	0.127816	No	3498265
ENSG00000171206	81603	TRIM8	tripartite motif containing 8	12997.2	13567.5	-1.04388	0.0401811	No	243501
ENSG00000143575	10456	HAX1	HCLS1 associated protein X-1	3000.5	3131.94	-1.04381	0.108649	No	3963193
ENSG00000228707	---	---	---	4.09498	1.17912	3.47291	0.0810549	No	3210015
ENSG00000101842	340547	VSIG1	V-set and immunoglobulin domain containing 1	13.8429	14.4483	-1.04373	0.89026	No	54555
ENSG00000204428	80741	LY6G5C	lymphocyte antigen 6 family member G5C	73.6824	76.9007	-1.04368	0.750987	No	597516
ENSG00000147400	1069	CETN2	centrin 2	3794.47	3959.98	-1.04362	0.0969889	No	589285
ENSG00000248475	---	---	---	2.28248	0.659354	3.46169	0.0744409	No	1341267
ENSG00000261819	728138	LOC728138	KIAA2013 pseudogene	36.1679	37.7434	-1.04356	0.831076	No	852014
ENSG00000234604	---	---	---	3.73862	1.08416	3.44841	0.141722	No	190661
ENSG00000251111	---	---	---	2.18628	0.635669	3.43934	0.0853217	No	268515
ENSG00000172888	285268	ZNF621	zinc finger protein 621	1278.46	1334.14	-1.04355	0.244788	No	285865
ENSG00000125753	7408	VASP	vasodilator stimulated phosphoprotein	12867.1	13426.8	-1.0435	0.0533903	No	539617
ENSG00000273455	---	---	---	4.21493	1.23286	3.41883	0.0683765	No	394936
ENSG00000203832	---	---	---	1403.05	357.227	3.92762	1.61314e-14	Yes	540340
ENSG00000250326	105377623	LOC105377623	uncharacterized LOC105377623	8.3627	8.72543	-1.04337	0.919369	No	1116122
ENSG00000235664	---	---	---	7.33692	1.87134	3.92068	0.00763195	Yes	310852
ENSG00000250057	---	---	---	2.89566	0.848633	3.41215	0.0855484	No	482688
ENSG00000130935	25926	NOL11	nucleolar protein 11	3634.25	3791.83	-1.04336	0.0840159	No	123744
ENSG00000168439	10963	STIP1	stress induced phosphoprotein 1	14619.4	15253.2	-1.04335	0.0396902	No	709460
ENSG00000253430	---	---	---	3.09099	0.78899	3.91765	0.041208	Yes	86956
ENSG00000259592	---	---	---	8.23977	2.10613	3.91228	0.00695009	Yes	2300724
ENSG00000084073	10269	ZMPSTE24	zinc metallopeptidase STE24	7554.74	7881.83	-1.0433	0.114791	No	2860142
ENSG00000224132	---	---	---	2.16671	0.635669	3.40854	0.0934895	No	1126592
ENSG00000241057	---	---	---	21.2701	5.44793	3.90425	0.00437428	Yes	393192
ENSG00000254537	---	---	---	2.47871	0.635669	3.89937	0.0459163	Yes	391713
ENSG00000269783	---	---	---	2.15639	0.635669	3.39232	0.0993998	No	819609
ENSG00000216109	---	---	---	3.27634	0.84333	3.88501	0.0460623	Yes	3001553
ENSG00000138744	27163	NAAA	N-acylethanolamine acid amidase	494.596	515.991	-1.04326	0.43176	No	360021
ENSG00000159023	2035	EPB41	erythrocyte membrane protein band 4.1	1875.12	1956.16	-1.04322	0.215289	No	373122
ENSG00000250237	---	---	---	3.29038	0.848633	3.87727	0.0385644	Yes	2496796
ENSG00000141429	2589	GALNT1	polypeptide N-acetylgalactosaminyltransferase 1	12479.9	13019.1	-1.04321	0.0498916	No	176067
ENSG00000235878	---	---	---	195.154	50.4322	3.86963	3.33474e-10	Yes	674079
ENSG00000039123	23517	MTREX	Mtr4 exosome RNA helicase	6737.36	7028.44	-1.0432	0.0665507	No	462020
ENSG00000166387	8495	PPFIBP2	PPFIA binding protein 2	1.80976	1.88791	-1.04319	0.958472	No	523810
ENSG00000252473	---	---	---	5.00348	1.48225	3.3756	0.062727	No	172789
ENSG00000137203	7020	TFAP2A	transcription factor AP-2 alpha	3993.3	4165.54	-1.04313	0.155536	No	449400
ENSG00000174013	200933	FBXO45	F-box protein 45	2029.4	2116.83	-1.04308	0.222288	No	528591
ENSG00000140905	2653	GCSH	glycine cleavage system protein H	537.891	561.015	-1.04299	0.385277	No	1637218
ENSG00000248975	---	---	---	3.6039	0.933751	3.85959	0.0330236	Yes	208021
ENSG00000228238	---	---	---	7.12444	1.84697	3.85737	0.00598586	Yes	1021217
ENSG00000259935	---	---	---	2.65876	0.78899	3.36982	0.0953082	No	483741
ENSG00000151881	64417	TMEM267	transmembrane protein 267	943.734	984.286	-1.04297	0.288801	No	549748
ENSG00000100478	11154	AP4S1	adaptor related protein complex 4 subunit sigma 1	311.8	325.175	-1.0429	0.601156	No	336109
ENSG00000064313	6873	TAF2	TATA-box binding protein associated factor 2	3934.87	4103.57	-1.04287	0.145407	No	3473509
ENSG00000259522	---	---	---	11.1282	2.90317	3.83314	0.00278286	Yes	922161
ENSG00000225401	---	---	---	3.48546	1.03704	3.36095	0.0719888	No	151995
ENSG00000156313	6103	RPGR	retinitis pigmentosa GTPase regulator	388.532	405.171	-1.04283	0.460527	No	4401781
ENSG00000129235	84817	TXNDC17	thioredoxin domain containing 17	2573.18	2683.06	-1.0427	0.163815	No	73541
ENSG00000229321	---	---	---	5.10511	1.33539	3.82294	0.0291447	Yes	1028169
ENSG00000199753	692227	SNORD104	small nucleolar RNA, C/D box 104	32.6066	33.9968	-1.04264	0.895231	No	685066
ENSG00000212802	653232	RPL15P3	ribosomal protein L15 pseudogene 3	3765.22	3925.69	-1.04262	0.223133	No	1305437
ENSG00000132612	27183	VPS4A	vacuolar protein sorting 4 homolog A	4909.17	5117.92	-1.04252	0.133022	No	1658503
ENSG00000225082	---	---	---	6.58506	1.72635	3.81444	0.0313587	Yes	2651745
ENSG00000139668	115825	WDFY2	WD repeat and FYVE domain containing 2	1407.86	1467.61	-1.04244	0.273934	No	479475
ENSG00000238132	---	---	---	3.6039	1.07611	3.34902	0.0726487	No	368806
ENSG00000261668	---	---	---	2.72837	0.815476	3.34575	0.0681142	No	371584
ENSG00000271984	---	---	---	2.62653	0.78899	3.32897	0.0893909	No	4915796
ENSG00000224959	---	---	---	4.97684	1.49663	3.32536	0.0519093	No	280469
ENSG00000251989	---	---	---	2.09391	0.635669	3.29402	0.123906	No	626767
ENSG00000244038	1650	DDOST	dolichyl-diphosphooligosaccharide--protein glycosyltransferase non-catalytic subunit	17944.1	18703.6	-1.04233	0.0381801	No	1386094
ENSG00000214029	101060200	ZNF891	zinc finger protein 891	156.081	162.667	-1.04219	0.667351	No	1431140
ENSG00000213563	414919	C8orf82	chromosome 8 open reading frame 82	721.415	751.839	-1.04217	0.428351	No	921440
ENSG00000272183	---	---	---	3.20309	0.972877	3.2924	0.0992519	No	1692146
ENSG00000203827	---	---	---	385.072	101.723	3.78548	1.37534e-09	Yes	196752
ENSG00000128513	25913	POT1	protection of telomeres 1	1527.05	1591.22	-1.04202	0.213986	No	1439665
ENSG00000253532	---	---	---	2.16671	0.659354	3.28611	0.093978	No	245395
ENSG00000224631	643358	RPS27AP16	RPS27A pseudogene 16	5392.34	5618.76	-1.04199	0.38416	No	2537255
ENSG00000272542	---	---	---	3.00946	0.917194	3.28116	0.0774974	No	2640419
ENSG00000270442	100131033	PPIGP1	peptidylprolyl isomerase G pseudogene 1	3.2709	3.40817	-1.04197	0.945044	No	1067671
ENSG00000170854	84864	RIOX2	ribosomal oxygenase 2	2593.18	2701.65	-1.04183	0.155894	No	426404
ENSG00000167136	2021	ENDOG	endonuclease G	504.826	525.942	-1.04183	0.56425	No	2081755
ENSG00000225498	---	---	---	3.18016	0.848633	3.74739	0.0478586	Yes	1145329
ENSG00000253741	100288181	LNCOC1	lncRNA associated with ovarian cancer 1	2.77538	2.89115	-1.04171	0.947662	No	729849
ENSG00000186567	56971	CEACAM19	CEA cell adhesion molecule 19	904.81	942.484	-1.04164	0.376107	No	1383909
ENSG00000110011	3338	DNAJC4	DnaJ heat shock protein family (Hsp40) member C4	1049.24	1092.91	-1.04161	0.329277	No	754466
ENSG00000072657	29953	TRHDE	thyrotropin releasing hormone degrading enzyme	3998.55	4164.12	-1.04141	0.214614	No	1200143
ENSG00000257534	---	---	---	2.08289	0.635669	3.27669	0.149476	No	527455
ENSG00000232082	100874353	RPS6KA2-IT1	RPS6KA2 intronic transcript 1	45.8786	47.7742	-1.04132	0.842913	No	447904
ENSG00000268643	---	---	---	4.78129	1.27941	3.7371	0.0322044	Yes	990644
ENSG00000213386	---	---	---	15.867	4.24637	3.73661	0.00226292	Yes	241529
ENSG00000257225	---	---	---	8.31724	2.22823	3.73266	0.0118947	Yes	1096677
ENSG00000224185	---	---	---	4.11605	1.10365	3.72949	0.0404548	Yes	258859
ENSG00000055917	23369	PUM2	pumilio RNA binding family member 2	8767.04	9128.89	-1.04127	0.104516	No	897671
ENSG00000129317	83448	PUS7L	pseudouridine synthase 7 like	1888.72	1966.67	-1.04127	0.254313	No	202259
ENSG00000100599	79890	RIN3	Ras and Rab interactor 3	1701.63	1771.74	-1.0412	0.21314	No	909951
ENSG00000186275	---	---	---	1231.8	331.134	3.71994	1.82577e-13	Yes	106329
ENSG00000272472	---	---	---	2.14072	0.659354	3.24669	0.0990841	No	941058
ENSG00000228444	---	---	---	10.3806	2.79114	3.71915	0.00643199	Yes	422844
ENSG00000213997	---	---	---	26.3339	7.0807	3.71911	0.0074962	Yes	568580
ENSG00000272108	---	---	---	5.03365	1.55576	3.23549	0.0512027	No	739041
ENSG00000257531	---	---	---	2.72608	0.84333	3.23252	0.0928957	No	625141
ENSG00000167526	6137	RPL13	ribosomal protein L13	48481	50473.7	-1.0411	0.0416948	No	430755
ENSG00000261093	---	---	---	5.33001	1.43562	3.71268	0.0371163	Yes	82054
ENSG00000129084	5682	PSMA1	proteasome 20S subunit alpha 1	2598.39	2705.02	-1.04104	0.210425	No	871706
ENSG00000267183	---	---	---	15.1931	4.09977	3.70584	0.00381544	Yes	3624156
ENSG00000272745	---	---	---	3.68023	0.993237	3.70528	0.0462258	Yes	2315220
ENSG00000112425	7957	EPM2A	EPM2A glucan phosphatase, laforin	462.047	481.004	-1.04103	0.527237	No	259770
ENSG00000249465	---	---	---	11.6294	3.14204	3.70122	0.00387266	Yes	244438
ENSG00000198246	55315	SLC29A3	solute carrier family 29 member 3	64.3809	67.0209	-1.04101	0.808537	No	7030
ENSG00000108039	7511	XPNPEP1	X-prolyl aminopeptidase 1	6290.36	6547.55	-1.04089	0.0705031	No	525497
ENSG00000233844	---	---	---	9.32605	2.52306	3.69633	0.00498499	Yes	58035
ENSG00000260118	---	---	---	21.2404	5.74698	3.69593	0.000286293	Yes	37411
ENSG00000187231	91404	SESTD1	SEC14 and spectrin domain containing 1	2286.19	2379.66	-1.04088	0.285913	No	1127808
ENSG00000228523	100130497	DNAJB6P4	DNAJB6 pseudogene 4	2.22693	2.31796	-1.04088	0.955893	No	241019
ENSG00000115657	10058	ABCB6	ATP binding cassette subfamily B member 6 (Langereis blood group)	264.658	275.438	-1.04073	0.607836	No	617744
ENSG00000255052	112268389	LOC112268389	uncharacterized LOC112268389	27.5585	28.681	-1.04073	0.859926	No	1035802
ENSG00000229820	---	---	---	3.00946	0.933751	3.22298	0.074345	No	1160
ENSG00000239467	---	---	---	8.27158	2.24169	3.68989	0.0049764	Yes	372444
ENSG00000102796	79758	DHRS12	dehydrogenase/reductase 12	225.35	234.518	-1.04068	0.647712	No	699123
ENSG00000254685	8790	FPGT	fucose-1-phosphate guanylyltransferase	678.84	706.412	-1.04062	0.401262	No	893095
ENSG00000259705	105370809	FBN1-DT	FBN1 divergent transcript	52.5448	54.6789	-1.04062	0.802968	No	2775071
ENSG00000253796	---	---	---	2.04301	0.635669	3.21396	0.172533	No	4076095
ENSG00000229390	---	---	---	3.36178	0.912827	3.68282	0.0425695	Yes	486654
ENSG00000113615	10802	SEC24A	SEC24 homolog A, COPII coat complex component	4301.54	4476.04	-1.04057	0.210425	No	334166
ENSG00000265185	---	---	---	3.06735	0.959649	3.19633	0.0648209	No	373583
ENSG00000078053	273	AMPH	amphiphysin	252.991	263.249	-1.04055	0.551929	No	1333724
ENSG00000256913	---	---	---	5.01478	1.58084	3.17223	0.0540769	No	898523
ENSG00000197442	4217	MAP3K5	mitogen-activated protein kinase kinase kinase 5	1559.1	1622.31	-1.04054	0.230026	No	1431409
ENSG00000268069	---	---	---	14.2853	3.89103	3.67135	0.00365616	Yes	487703
ENSG00000115541	3336	HSPE1	heat shock protein family E (Hsp10) member 1	3173.92	3302.33	-1.04046	0.142684	No	814848
ENSG00000240471	---	---	---	3.28173	1.03663	3.16578	0.09119	No	1654836
ENSG00000230850	---	---	---	4.52461	1.44008	3.14192	0.114136	No	2317838
ENSG00000141552	51529	ANAPC11	anaphase promoting complex subunit 11	2429.23	2527.35	-1.04039	0.206103	No	1067451
ENSG00000248863	---	---	---	1.99593	0.635669	3.13989	0.149054	No	6672
ENSG00000272941	---	---	---	83.7476	22.9027	3.65667	1.73814e-06	Yes	47486
ENSG00000232838	100303755	PET117	PET117 cytochrome c oxidase chaperone	285.653	297.188	-1.04038	0.553273	No	84894
ENSG00000253286	---	---	---	7.26906	1.98945	3.65381	0.0301142	Yes	307197
ENSG00000269924	---	---	---	3.24697	0.888804	3.65318	0.0488301	Yes	492670
ENSG00000162852	163882	CNST	consortin, connexin sorting protein	2612.26	2717.64	-1.04034	0.173531	No	175174
ENSG00000268172	---	---	---	6.5879	1.80852	3.6427	0.0348643	Yes	447590
ENSG00000228546	392713	PMS2P12	PMS1 homolog 2, mismatch repair system component pseudogene 12	2.72561	2.83547	-1.04031	0.950562	No	1485761
ENSG00000188352	54914	FOCAD	focadhesin	3464.37	3603.9	-1.04028	0.147569	No	3012756
ENSG00000271784	---	---	---	20.5481	5.65815	3.63159	0.00066613	Yes	5712037
ENSG00000135801	27097	TAF5L	TATA-box binding protein associated factor 5 like	2057.12	2139.96	-1.04027	0.177168	No	110209
ENSG00000203825	---	---	---	9.28154	2.55942	3.62642	0.00356098	Yes	97440
ENSG00000134020	157310	PEBP4	phosphatidylethanolamine binding protein 4	1.14392	1.18992	-1.04021	0.965615	No	57937
ENSG00000146909	64434	NOM1	nucleolar protein with MIF4G domain 1	2458.09	2556.89	-1.04019	0.181	No	153764
ENSG00000272849	---	---	---	3.43801	1.10244	3.11856	0.0869306	No	739849
ENSG00000147852	7436	VLDLR	very low density lipoprotein receptor	760.657	791.136	-1.04007	0.453604	No	309421
ENSG00000224903	---	---	---	5.73505	1.59063	3.60552	0.015989	Yes	445795
ENSG00000148303	6130	RPL7A	ribosomal protein L7a	51857.7	53930.8	-1.03998	0.0462937	No	244483
ENSG00000250889	---	---	---	6.49985	1.80728	3.59648	0.0124507	Yes	247198
ENSG00000272699	---	---	---	2.53988	0.815476	3.1146	0.140675	No	1034581
ENSG00000232702	---	---	---	2.98383	0.959649	3.1093	0.0754977	No	393822
ENSG00000225857	---	---	---	5.12023	1.42651	3.58933	0.019928	Yes	35568
ENSG00000125458	30833	NT5C	5', 3'-nucleotidase, cytosolic	904.944	941.069	-1.03992	0.301527	No	294524
ENSG00000120899	2185	PTK2B	protein tyrosine kinase 2 beta	521.751	542.554	-1.03987	0.521163	No	381867
ENSG00000165283	30968	STOML2	stomatin like 2	4742.49	4931.49	-1.03985	0.110469	No	99753
ENSG00000233716	---	---	---	1.5325	0.49294	3.1089	0.218783	No	1459516
ENSG00000269545	---	---	---	5.52859	1.81026	3.05404	0.0909649	No	6157736
ENSG00000218109	283165	KIRREL3-AS3	KIRREL3 antisense RNA 3	1.22695	1.27582	-1.03983	0.96492	No	1143112
ENSG00000237264	---	---	---	3917.8	1094.12	3.58076	3.88281e-16	Yes	114960
ENSG00000266912	---	---	---	11.085	3.09716	3.57908	0.00375809	Yes	2395830
ENSG00000227742	---	---	---	3.03608	0.994984	3.05138	0.115842	No	663612
ENSG00000236969	---	---	---	3.86694	1.08056	3.57865	0.0397175	Yes	125970
ENSG00000248634	---	---	---	2.54724	0.845658	3.01215	0.129109	No	155493
ENSG00000105221	208	AKT2	AKT serine/threonine kinase 2	8950.85	9307.17	-1.03981	0.0754871	No	193469
ENSG00000236105	---	---	---	3.99805	1.12003	3.56958	0.0394926	Yes	1259735
ENSG00000117153	59349	KLHL12	kelch like family member 12	1967.79	2046.02	-1.03976	0.183005	No	1037803
ENSG00000265218	---	---	---	12.6356	3.54206	3.56731	0.00405313	Yes	19662
ENSG00000243389	---	---	---	5.07755	1.42366	3.56655	0.0408884	Yes	230644
ENSG00000154845	9989	PPP4R1	protein phosphatase 4 regulatory subunit 1	8191.57	8517.2	-1.03975	0.077042	No	61973
ENSG00000135317	57231	SNX14	sorting nexin 14	4710.07	4897.26	-1.03974	0.167581	No	3186457
ENSG00000232097	---	---	---	3.23856	1.0759	3.0101	0.116591	No	568764
ENSG00000232411	---	---	---	7.35016	2.07124	3.54868	0.0290622	Yes	1141145
ENSG00000151470	132321	C4orf33	chromosome 4 open reading frame 33	510.645	530.935	-1.03973	0.451143	No	39347
ENSG00000106025	23554	TSPAN12	tetraspanin 12	405.249	421.337	-1.0397	0.463182	No	852847
ENSG00000231612	---	---	---	1.91077	0.635669	3.00591	0.162802	No	714458
ENSG00000266385	---	---	---	2.88204	0.959649	3.00322	0.102395	No	237258
ENSG00000227136	---	---	---	5.05601	1.68409	3.00222	0.0736456	No	226017
ENSG00000232224	---	---	---	4.5796	1.29899	3.5255	0.0379014	Yes	166764
ENSG00000057757	57095	PITHD1	PITH domain containing 1	3255.27	3384.4	-1.03967	0.160004	No	2919880
ENSG00000260796	---	---	---	4.01045	1.33902	2.99507	0.111633	No	103477
ENSG00000239256	---	---	---	2.86566	0.959649	2.98616	0.105871	No	457673
ENSG00000038274	27430	MAT2B	methionine adenosyltransferase 2B	4312.87	4483.78	-1.03963	0.122943	No	714331
ENSG00000250049	---	---	---	1.89729	0.635669	2.98472	0.186338	No	1415742
ENSG00000233674	---	---	---	2.52324	0.845658	2.98376	0.0939637	No	624830
ENSG00000224116	285954	INHBA-AS1	INHBA antisense RNA 1	39.2475	40.8012	-1.03959	0.843597	No	1728203
ENSG00000259298	---	---	---	2.14072	0.721921	2.96531	0.14039	No	922279
ENSG00000254982	---	---	---	3.8513	1.29899	2.96484	0.099201	No	4525393
ENSG00000221890	23467	NPTXR	neuronal pentraxin receptor	1887.71	1962.38	-1.03955	0.260938	No	827886
ENSG00000232994	---	---	---	2.13875	0.721921	2.96258	0.126485	No	1025667
ENSG00000230918	---	---	---	5.80113	1.66129	3.49194	0.0191526	Yes	2457831
ENSG00000184984	1133	CHRM5	cholinergic receptor muscarinic 5	3.3166	3.4477	-1.03953	0.946385	No	1147361
ENSG00000018510	8540	AGPS	alkylglycerone phosphate synthase	7820.3	8128.65	-1.03943	0.102758	No	35307
ENSG00000064489	---	---	---	1.95029	0.659354	2.95787	0.172717	No	41887
ENSG00000260369	---	---	---	3.05571	1.03704	2.94656	0.0909274	No	221841
ENSG00000104408	3646	EIF3E	eukaryotic translation initiation factor 3 subunit E	14664.7	15242.2	-1.03938	0.0497267	No	4704179
ENSG00000102078	9016	SLC25A14	solute carrier family 25 member 14	632.018	656.88	-1.03934	0.390028	No	816064
ENSG00000019102	23584	VSIG2	V-set and immunoglobulin domain containing 2	2.29546	2.38573	-1.03932	0.961915	No	1107064
ENSG00000273321	---	---	---	3.34876	1.13802	2.94262	0.0729849	No	1370858
ENSG00000253582	---	---	---	2.86587	0.975974	2.93642	0.107985	No	6481965
ENSG00000184117	8508	NIPSNAP1	nipsnap homolog 1	4765.83	4953.1	-1.03929	0.13172	No	915784
ENSG00000010322	11188	NISCH	nischarin	5389.47	5600.36	-1.03913	0.111881	No	584641
ENSG00000225671	---	---	---	6.13079	1.76982	3.46407	0.0419653	Yes	134897
ENSG00000259797	---	---	---	3.28107	1.12003	2.92944	0.102887	No	2653058
ENSG00000215481	---	---	---	6.3674	1.84237	3.4561	0.0328442	Yes	148707
ENSG00000145242	2044	EPHA5	EPH receptor A5	3454.48	3589.46	-1.03907	0.391044	No	1940349
ENSG00000238683	---	---	---	2.23913	0.765225	2.9261	0.151134	No	1261185
ENSG00000163344	10654	PMVK	phosphomevalonate kinase	1567.44	1628.48	-1.03894	0.277661	No	3298714
ENSG00000243915	---	---	---	3.74658	1.28179	2.92291	0.0917394	No	3639780
ENSG00000257272	---	---	---	2.47063	0.848633	2.9113	0.113629	No	274803
ENSG00000230204	---	---	---	1036.52	301.208	3.4412	4.72955e-15	Yes	25
ENSG00000272114	---	---	---	6.98604	2.40208	2.90833	0.0896015	No	39574
ENSG00000071246	22846	VASH1	vasohibin 1	557.103	578.798	-1.03894	0.508919	No	240190
ENSG00000233427	---	---	---	3.62523	1.25023	2.89964	0.119655	No	363366
ENSG00000088256	2767	GNA11	G protein subunit alpha 11	11598.3	12049.6	-1.03892	0.0737671	No	34006
ENSG00000111361	1967	EIF2B1	eukaryotic translation initiation factor 2B subunit alpha	3217.14	3342.3	-1.0389	0.142923	No	838784
ENSG00000254791	---	---	---	4.38133	1.27941	3.42449	0.0397972	Yes	716790
ENSG00000241490	---	---	---	7.26878	2.12259	3.42449	0.0136246	Yes	330808
ENSG00000229828	---	---	---	4.45716	1.53736	2.89922	0.110312	No	468784
ENSG00000272864	---	---	---	19.7212	5.76367	3.42163	0.00184539	Yes	1394215
ENSG00000217159	---	---	---	1.89729	0.659354	2.8775	0.19663	No	543192
ENSG00000231875	---	---	---	3.6634	1.2747	2.87392	0.0934525	No	1699618
ENSG00000259581	---	---	---	6.73167	2.34306	2.87302	0.0871433	No	505854
ENSG00000145414	92345	NAF1	nuclear assembly factor 1 ribonucleoprotein	1557.9	1618.44	-1.03886	0.258558	No	1378205
ENSG00000269895	---	---	---	20.0199	5.86011	3.41631	0.000376147	Yes	89135
ENSG00000244723	---	---	---	8.26559	2.42021	3.41524	0.018993	Yes	224253
ENSG00000181924	51287	COA4	cytochrome c oxidase assembly factor 4 homolog	2949.86	3064.46	-1.03885	0.167143	No	2019897
ENSG00000204315	63943	FKBPL	FKBP prolyl isomerase like	340.397	353.616	-1.03884	0.518509	No	151265
ENSG00000223928	---	---	---	2.54445	0.888804	2.86277	0.14843	No	1506229
ENSG00000273035	---	---	---	5.67545	1.9879	2.85499	0.0510475	No	132776
ENSG00000213411	---	---	---	3.05571	1.07174	2.85117	0.0832074	No	72473
ENSG00000112514	51596	CUTA	cutA divalent cation tolerance homolog	8752.49	9092.21	-1.03881	0.0923685	No	1136363
ENSG00000172493	4299	AFF1	ALF transcription elongation factor 1	4022.96	4178.84	-1.03875	0.331926	No	522855
ENSG00000232184	---	---	---	1.80988	0.635669	2.8472	0.182947	No	94987
ENSG00000160194	4731	NDUFV3	NADH:ubiquinone oxidoreductase subunit V3	2548.57	2647.2	-1.0387	0.228453	No	2337077
ENSG00000164889	6522	SLC4A2	solute carrier family 4 member 2	19391	20140.1	-1.03863	0.0624972	No	250109
ENSG00000168014	26005	C2CD3	C2 domain containing 3 centriole elongation regulator	2127.43	2209.6	-1.03863	0.223154	No	1725675
ENSG00000258077	---	---	---	75.8826	22.3206	3.39967	2.52798e-07	Yes	462385
ENSG00000224460	---	---	---	37.5439	11.0476	3.39838	0.000248608	Yes	69506
ENSG00000248533	---	---	---	2.419	0.850438	2.84442	0.130515	No	3266267
ENSG00000198900	7150	TOP1	DNA topoisomerase I	10844	11262.7	-1.03861	0.098277	No	51197
ENSG00000255959	---	---	---	3.15597	1.11042	2.84214	0.107152	No	1094613
ENSG00000141425	55197	RPRD1A	regulation of nuclear pre-mRNA domain containing 1A	5316.33	5520.86	-1.03847	0.112184	No	1055
ENSG00000139531	6821	SUOX	sulfite oxidase	839.459	871.686	-1.03839	0.320698	No	395119
ENSG00000181896	94039	ZNF101	zinc finger protein 101	410.618	426.361	-1.03834	0.598292	No	434111
ENSG00000112855	23438	HARS2	histidyl-tRNA synthetase 2, mitochondrial	2006.87	2083.54	-1.0382	0.213126	No	311790
ENSG00000227376	---	---	---	1833.35	542.943	3.37669	3.24287e-16	Yes	525530
ENSG00000233264	---	---	---	2.81557	0.992264	2.83752	0.131293	No	1954780
ENSG00000122417	57489	ODF2L	outer dense fiber of sperm tails 2 like	1176.04	1220.85	-1.0381	0.355296	No	209709
ENSG00000175265	23015	GOLGA8A	golgin A8 family member A	520.693	540.497	-1.03803	0.705287	No	1767143
ENSG00000273492	---	---	---	6.95301	2.45169	2.83601	0.0955385	No	349756
ENSG00000235290	---	---	---	2.92095	1.03031	2.83502	0.18313	No	502521
ENSG00000197697	---	---	---	3.03811	1.07174	2.83474	0.121664	No	523534
ENSG00000104129	55192	DNAJC17	DnaJ heat shock protein family (Hsp40) member C17	636.663	660.877	-1.03803	0.52605	No	995989
ENSG00000213965	390916	NUDT19	nudix hydrolase 19	1811.58	1880.31	-1.03794	0.248959	No	1290810
ENSG00000075275	9620	CELSR1	cadherin EGF LAG seven-pass G-type receptor 1	5085.73	5278.67	-1.03794	0.173661	No	1701918
ENSG00000214955	---	---	---	5.08431	1.80113	2.82285	0.14899	No	244867
ENSG00000252010	677775	SCARNA5	small Cajal body-specific RNA 5	1.36319	1.41484	-1.03789	0.965615	No	530752
ENSG00000221319	---	---	---	8.21577	2.91497	2.81847	0.0698118	No	3943777
ENSG00000257954	---	---	---	8.17966	2.9075	2.8133	0.0535983	No	203266
ENSG00000198087	23607	CD2AP	CD2 associated protein	8078.07	8384.16	-1.03789	0.126464	No	342508
ENSG00000239280	---	---	---	7.0841	2.11241	3.35356	0.015484	Yes	95570
ENSG00000268392	---	---	---	7.12858	2.12636	3.35247	0.0227833	Yes	5553305
ENSG00000131711	4131	MAP1B	microtubule associated protein 1B	32692.2	33929.6	-1.03785	0.343364	No	938372
ENSG00000142082	23410	SIRT3	sirtuin 3	764.502	793.411	-1.03781	0.471152	No	188241
ENSG00000270066	---	---	---	29.4857	8.80198	3.34989	0.000385048	Yes	608697
ENSG00000160602	284086	NEK8	NIMA related kinase 8	233.671	242.491	-1.03775	0.628426	No	1072597
ENSG00000213600	---	---	---	4.58024	1.64628	2.78218	0.102603	No	770711
ENSG00000255040	---	---	---	4.1768	1.50153	2.7817	0.0951142	No	840786
ENSG00000211456	22908	SACM1L	SAC1 like phosphatidylinositide phosphatase	3940.99	4089.1	-1.03758	0.15994	No	100071
ENSG00000267757	100287177	EML2-AS1	EML2 antisense RNA 1	22.6885	23.5399	-1.03752	0.8719	No	404702
ENSG00000266644	---	---	---	3.63133	1.31203	2.76771	0.154994	No	12625
ENSG00000251463	---	---	---	2.42415	0.879487	2.75632	0.138839	No	131510
ENSG00000230490	---	---	---	2.80757	1.01953	2.75379	0.145909	No	2040183
ENSG00000272065	---	---	---	6.34427	2.30801	2.74881	0.0543037	No	716503
ENSG00000239857	51608	GET4	guided entry of tail-anchored proteins factor 4	371.149	385.063	-1.03749	0.583729	No	457747
ENSG00000152042	---	---	---	149.056	44.6152	3.34092	8.54897e-07	Yes	397111
ENSG00000232530	110806283	LIF-AS1	LIF antisense RNA 1	6.96483	7.22507	-1.03736	0.933965	No	1573642
ENSG00000044446	5256	PHKA2	phosphorylase kinase regulatory subunit alpha 2	1433.14	1486.66	-1.03735	0.371495	No	434519
ENSG00000158545	124245	ZC3H18	zinc finger CCCH-type containing 18	4684.8	4859.7	-1.03733	0.134834	No	558902
ENSG00000146425	6993	DYNLT1	dynein light chain Tctex-type 1	3713.02	3851.53	-1.0373	0.222842	No	538914
ENSG00000213713	---	---	---	1.93347	0.703539	2.74821	0.203468	No	84042
ENSG00000267457	---	---	---	4.86316	1.77056	2.74668	0.0979183	No	2425399
ENSG00000260086	---	---	---	18.1428	5.46265	3.32124	0.000680337	Yes	36418
ENSG00000256902	---	---	---	1.8071	0.659354	2.74072	0.208157	No	773660
ENSG00000105676	93436	ARMC6	armadillo repeat containing 6	2820.95	2926.15	-1.03729	0.228269	No	200469
ENSG00000117360	9129	PRPF3	pre-mRNA processing factor 3	2932.68	3041.98	-1.03727	0.227925	No	291182
ENSG00000269916	---	---	---	6.10334	2.22779	2.73964	0.0830157	No	4481450
ENSG00000271992	---	---	---	8.1044	2.45009	3.3078	0.0284654	Yes	177199
ENSG00000264864	100500908	MIR3613	microRNA 3613	3.56861	3.70121	-1.03716	0.95062	No	142594
ENSG00000185875	79896	THNSL1	threonine synthase like 1	761.044	789.311	-1.03714	0.423556	No	647406
ENSG00000087302	51637	RTRAF	RNA transcription, translation and transport factor	6707.32	6956.06	-1.03708	0.129582	No	459477
ENSG00000254245	56112	PCDHGA3	protocadherin gamma subfamily A, 3	10.6862	11.0814	-1.03699	0.931874	No	964380
ENSG00000203306	---	---	---	88.1839	26.7707	3.29405	1.73916e-07	Yes	770820
ENSG00000252874	---	---	---	3.48761	1.27941	2.72595	0.0856995	No	823874
ENSG00000164972	84688	C9orf24	chromosome 9 open reading frame 24	6.7002	6.94799	-1.03698	0.940945	No	805077
ENSG00000184040	---	---	---	4.83508	1.77543	2.72333	0.0736659	No	945839
ENSG00000173914	83759	RBM4B	RNA binding motif protein 4B	1129.06	1170.81	-1.03698	0.324496	No	1148278
ENSG00000242992	---	---	---	5.64535	2.07798	2.71675	0.0772768	No	26250
ENSG00000090920	---	---	---	6.36597	1.93753	3.28562	0.0347211	Yes	107064
ENSG00000206028	---	---	---	7.32941	2.23164	3.28432	0.0227405	Yes	582786
ENSG00000254912	---	---	---	36.7595	11.1991	3.28236	0.00171779	Yes	320639
ENSG00000271420	---	---	---	2.03221	0.748072	2.71659	0.221907	No	3319254
ENSG00000253166	---	---	---	3.79686	1.40455	2.70327	0.0882013	No	5687478
ENSG00000259939	---	---	---	12.4962	3.80929	3.28046	0.0164299	Yes	786463
ENSG00000235411	---	---	---	4.4461	1.64639	2.70052	0.11147	No	786483
ENSG00000248159	---	---	---	2.59097	0.959649	2.69991	0.15339	No	3307766
ENSG00000268987	---	---	---	1.94707	0.721921	2.69707	0.181912	No	1307304
ENSG00000158985	56990	CDC42SE2	CDC42 small effector 2	2109.69	2187.15	-1.03672	0.241364	No	522464
ENSG00000101546	79863	RBFA	ribosome binding factor A	985.017	1021.07	-1.0366	0.378638	No	29898823
ENSG00000259921	---	---	---	6.09335	1.86286	3.27097	0.0382346	Yes	151592
ENSG00000134371	79577	CDC73	cell division cycle 73	4793.24	4967.75	-1.03641	0.165721	No	637316
ENSG00000257513	---	---	---	2.18113	0.810891	2.68979	0.187126	No	902237
ENSG00000068912	27248	ERLEC1	endoplasmic reticulum lectin 1	5528.26	5729.48	-1.0364	0.150548	No	327767
ENSG00000137274	670	BPHL	biphenyl hydrolase like	708.499	734.195	-1.03627	0.472358	No	358438
ENSG00000132498	---	---	---	3.43948	1.27941	2.68833	0.142029	No	894610
ENSG00000230724	---	---	---	8.64239	2.65522	3.25487	0.017266	Yes	285560
ENSG00000149428	10525	HYOU1	hypoxia up-regulated 1	16818.7	17428.4	-1.03625	0.119838	No	1101004
ENSG00000034713	11345	GABARAPL2	GABA type A receptor associated protein like 2	2647.02	2742.84	-1.0362	0.236536	No	1401766
ENSG00000226564	---	---	---	3161.93	972.227	3.25225	7.44686e-18	Yes	183495
ENSG00000236567	---	---	---	3.82045	1.42116	2.68826	0.133252	No	1274185
ENSG00000197535	4644	MYO5A	myosin VA	10385.2	10761	-1.03618	0.251113	No	362925
ENSG00000202078	---	---	---	11.2678	3.47209	3.24525	0.00538764	Yes	62087
ENSG00000200502	---	---	---	2.11922	0.788541	2.68752	0.189277	No	314195
ENSG00000115677	3069	HDLBP	high density lipoprotein binding protein	58321.2	60430.5	-1.03617	0.0515891	No	144806
ENSG00000213061	---	---	---	2.2819	0.850438	2.68321	0.130211	No	42525
ENSG00000260052	---	---	---	5.39499	1.6681	3.23422	0.0377732	Yes	22711
ENSG00000234832	---	---	---	4.87549	1.82001	2.67882	0.112193	No	76424
ENSG00000264508	---	---	---	2.34664	0.879487	2.66819	0.193454	No	536592
ENSG00000232187	---	---	---	3263.49	1010.04	3.23106	4.30131e-18	Yes	1225394
ENSG00000179091	1537	CYC1	cytochrome c1	5040.99	5222.86	-1.03608	0.178267	No	316855
ENSG00000228818	266783	PSMD2P1	proteasome 26S subunit, non-ATPase, 2 pseudogene 1	10.3011	10.6727	-1.03607	0.916429	No	230791
ENSG00000197958	6136	RPL12	ribosomal protein L12	38198.7	39574.3	-1.03601	0.116779	No	714685
ENSG00000261433	---	---	---	5.22679	1.61933	3.22775	0.0285955	Yes	1040877
ENSG00000110713	4928	NUP98	nucleoporin 98 and 96 precursor	9039.31	9364.71	-1.036	0.181006	No	1567724
ENSG00000271741	---	---	---	2.43018	0.912827	2.66226	0.154313	No	729493
ENSG00000259915	---	---	---	3.83484	1.44051	2.66214	0.103471	No	604953
ENSG00000214546	---	---	---	2.30652	0.867592	2.65853	0.176979	No	4766704
ENSG00000237945	100506334	LINC00649	long intergenic non-protein coding RNA 649	6.85639	7.10258	-1.03591	0.931777	No	44068
ENSG00000228499	---	---	---	3.94045	1.48225	2.65842	0.0849897	No	2075681
ENSG00000232692	---	---	---	116.685	36.3444	3.21053	8.45208e-08	Yes	557438
ENSG00000108582	1362	CPD	carboxypeptidase D	11240	11643.5	-1.0359	0.27225	No	31696
ENSG00000238244	---	---	---	2.73848	1.03031	2.65792	0.144717	No	627376
ENSG00000268288	---	---	---	6.84815	2.58379	2.65043	0.0704706	No	1736732
ENSG00000271815	---	---	---	3.96545	1.49738	2.64826	0.153996	No	63338
ENSG00000134882	337867	UBAC2	UBA domain containing 2	3859.33	3997.59	-1.03583	0.161531	No	519056
ENSG00000224409	---	---	---	3.66579	1.38581	2.64523	0.121348	No	120816
ENSG00000255138	---	---	---	6.94481	2.62604	2.6446	0.0558589	No	569412
ENSG00000259771	---	---	---	6.00883	2.27574	2.64039	0.124312	No	331534
ENSG00000183655	64410	KLHL25	kelch like family member 25	567.128	587.418	-1.03578	0.475782	No	51239
ENSG00000269068	---	---	---	3.76299	1.42651	2.6379	0.0732857	No	277650
ENSG00000235513	---	---	---	2.13875	0.810891	2.63753	0.166498	No	1037641
ENSG00000081154	57092	PCNP	PEST proteolytic signal containing nuclear protein	10938.7	11329.4	-1.03572	0.0926181	No	218967
ENSG00000100216	56993	TOMM22	translocase of outer mitochondrial membrane 22	5418.8	5611.84	-1.03562	0.148287	No	989919
ENSG00000267167	---	---	---	4.67878	1.77472	2.63635	0.0828363	No	1318242
ENSG00000185904	84856	LINC00839	long intergenic non-protein coding RNA 839	226.859	234.938	-1.03561	0.627705	No	5848889
ENSG00000033050	10061	ABCF2	ATP binding cassette subfamily F member 2	7525	7790.24	-1.03525	0.174922	No	420127
ENSG00000089057	9962	SLC23A2	solute carrier family 23 member 2	4702.15	4867.87	-1.03524	0.219409	No	2073126
ENSG00000116688	9927	MFN2	mitofusin 2	9516.92	9852.2	-1.03523	0.107765	No	407559
ENSG00000100307	23492	CBX7	chromobox 7	536.853	555.726	-1.03515	0.49234	No	519194
ENSG00000172531	5499	PPP1CA	protein phosphatase 1 catalytic subunit alpha	8719.49	9025.95	-1.03515	0.126899	No	405016
ENSG00000249352	---	---	---	2.22286	0.84333	2.63581	0.209081	No	2483140
ENSG00000230131	---	---	---	2.07948	0.78899	2.63562	0.205066	No	1289569
ENSG00000235071	100132857	LOC100132857	heat shock protein 90 alpha family class B member 1 pseudogene	1.26276	1.30712	-1.03513	0.969343	No	295979
ENSG00000227436	---	---	---	4.74633	1.8009	2.63553	0.142956	No	144044
ENSG00000243745	---	---	---	13.2632	4.19531	3.16143	0.00359046	Yes	8629
ENSG00000239028	---	---	---	1.73699	0.659354	2.63438	0.235359	No	110454
ENSG00000271553	---	---	---	22.6812	7.1862	3.15621	0.000271653	Yes	111022
ENSG00000219891	---	---	---	5.00066	1.8994	2.63276	0.137916	No	13044
ENSG00000180035	197407	ZNF48	zinc finger protein 48	1283.04	1328.08	-1.03511	0.341241	No	51757
ENSG00000112893	4124	MAN2A1	mannosidase alpha class 2A member 1	11945.4	12364.3	-1.03507	0.225358	No	337537
ENSG00000242960	---	---	---	715.317	226.933	3.15211	1.03778e-12	Yes	214443
ENSG00000124275	4552	MTRR	5-methyltetrahydrofolate-homocysteine methyltransferase reductase	2523.19	2611.62	-1.03505	0.236057	No	1056843
ENSG00000232860	284649	SMG7-AS1	SMG7 antisense RNA 1	4.61034	4.77177	-1.03501	0.943652	No	1008132
ENSG00000119559	148223	C19orf25	chromosome 19 open reading frame 25	2756.11	2852.48	-1.03496	0.215725	No	1648860
ENSG00000103202	4833	NME4	NME/NM23 nucleoside diphosphate kinase 4	5961.06	6167.81	-1.03468	0.138364	No	76627
ENSG00000229955	---	---	---	1.89961	0.721921	2.63132	0.206543	No	1201996
ENSG00000258171	---	---	---	6.79357	2.58495	2.62812	0.0735337	No	1640606
ENSG00000160049	1676	DFFA	DNA fragmentation factor subunit alpha	5048.3	5222.99	-1.0346	0.160119	No	77912
ENSG00000250657	---	---	---	59.1787	18.863	3.13728	3.07694e-06	Yes	570892
ENSG00000171475	147179	WIPF2	WAS/WASL interacting protein family member 2	4219.59	4365.47	-1.03457	0.285605	No	4167014
ENSG00000235560	107984875	ZNF747-DT	ZNF747 divergent transcript	17.5837	18.191	-1.03454	0.91278	No	103934
ENSG00000137573	23213	SULF1	sulfatase 1	766.771	793.224	-1.0345	0.495567	No	1608763
ENSG00000163516	55139	ANKZF1	ankyrin repeat and zinc finger peptidyl tRNA hydrolase 1	1408.16	1456.68	-1.03445	0.404989	No	606976
ENSG00000203804	---	---	---	4.99416	1.91148	2.61272	0.142975	No	531225
ENSG00000085871	4258	MGST2	microsomal glutathione S-transferase 2	668.176	691.196	-1.03445	0.486722	No	227648
ENSG00000263020	---	---	---	20.5031	6.5587	3.1261	0.00412585	Yes	615453
ENSG00000183808	389677	RBM12B	RNA binding motif protein 12B	2281.58	2360.08	-1.03441	0.327943	No	13783
ENSG00000254708	---	---	---	10.4138	3.33408	3.12345	0.00754487	Yes	540687
ENSG00000270127	---	---	---	24.8481	7.96069	3.12135	0.000161158	Yes	195934
ENSG00000135441	2647	BLOC1S1	biogenesis of lysosomal organelles complex 1 subunit 1	471.866	488.101	-1.03441	0.571952	No	676263
ENSG00000260971	---	---	---	3.99577	1.54145	2.59222	0.156191	No	166545
ENSG00000124243	55653	BCAS4	breast carcinoma amplified sequence 4	871.592	901.557	-1.03438	0.401117	No	2783731
ENSG00000267088	---	---	---	5.15039	1.98945	2.58886	0.121825	No	2715324
ENSG00000186468	6228	RPS23	ribosomal protein S23	36577.5	37833.7	-1.03434	0.0862622	No	814224
ENSG00000160360	26086	GPSM1	G protein signaling modulator 1	3189.44	3298.85	-1.03431	0.204748	No	166359
ENSG00000119509	27130	INVS	inversin	1130.56	1169.28	-1.03425	0.369384	No	23308
ENSG00000165650	118987	PDZD8	PDZ domain containing 8	7061.41	7303.13	-1.03423	0.221187	No	2391765
ENSG00000269967	---	---	---	4.02225	1.55996	2.57843	0.123139	No	924212
ENSG00000224769	---	---	---	7.30331	2.8426	2.56923	0.0565548	No	424687
ENSG00000077254	23032	USP33	ubiquitin specific peptidase 33	5006.07	5177.32	-1.03421	0.194595	No	1320
ENSG00000233081	---	---	---	3.69032	1.43978	2.56312	0.202367	No	94955
ENSG00000242017	---	---	---	2.86505	1.1187	2.56105	0.212588	No	201606
ENSG00000201573	---	---	---	7.13279	2.78576	2.56045	0.068053	No	354928
ENSG00000258714	---	---	---	5.42585	2.12181	2.55718	0.123516	No	173086
ENSG00000184613	4753	NELL2	neural EGFL like 2	5.06481	5.23775	-1.03415	0.943763	No	1326057
ENSG00000273189	---	---	---	10.0093	3.22661	3.1021	0.0298432	Yes	204772
ENSG00000259137	---	---	---	3.06735	1.20367	2.54833	0.122284	No	257843
ENSG00000144021	9391	CIAO1	cytosolic iron-sulfur assembly component 1	4374.06	4523.38	-1.03414	0.194065	No	708171
ENSG00000238098	650655	ABCA17P	ATP binding cassette subfamily A member 17, pseudogene	13.6188	14.0825	-1.03405	0.936778	No	342621
ENSG00000232311	---	---	---	6.665	2.61567	2.54811	0.0841794	No	1079647
ENSG00000069943	9488	PIGB	phosphatidylinositol glycan anchor biosynthesis class B	753.887	779.538	-1.03403	0.436247	No	807267
ENSG00000131152	---	---	---	9.28893	3.0062	3.08992	0.0105302	Yes	1069871
ENSG00000137074	54840	APTX	aprataxin	2077.11	2147.69	-1.03398	0.27385	No	618674
ENSG00000119321	23307	FKBP15	FKBP prolyl isomerase family member 15	3761.72	3889.3	-1.03392	0.204738	No	419015
ENSG00000264311	---	---	---	7.57923	2.98292	2.54088	0.0592694	No	497484
ENSG00000165516	23588	KLHDC2	kelch domain containing 2	1640.53	1696.06	-1.03385	0.307525	No	49266
ENSG00000168876	54851	ANKRD49	ankyrin repeat domain 49	554.321	573.061	-1.03381	0.572588	No	243102
ENSG00000165886	80019	UBTD1	ubiquitin domain containing 1	4104.58	4242.87	-1.03369	0.246211	No	605769
ENSG00000141279	9520	NPEPPS	aminopeptidase puromycin sensitive	9675.61	10001.2	-1.03365	0.14593	No	270551
ENSG00000257607	---	---	---	7.8267	2.53724	3.08473	0.0497173	Yes	624883
ENSG00000234009	388907	RPL5P34	ribosomal protein L5 pseudogene 34	532.831	550.759	-1.03365	0.551353	No	927251
ENSG00000267504	---	---	---	11.658	4.59425	2.53753	0.0588431	No	8143263
ENSG00000057935	57504	MTA3	metastasis associated 1 family member 3	2547.95	2633.36	-1.03352	0.23006	No	239679
ENSG00000224635	---	---	---	32.3779	10.5117	3.08018	0.00039751	Yes	315671
ENSG00000242539	---	---	---	8.52376	2.76781	3.0796	0.0128403	Yes	1033482
ENSG00000224312	---	---	---	4.21543	1.66129	2.53744	0.110584	No	463804
ENSG00000249245	---	---	---	2.72726	1.0759	2.53487	0.204926	No	201490
ENSG00000172915	26960	NBEA	neurobeachin	2003.99	2070.99	-1.03343	0.402577	No	3305703
ENSG00000238258	---	---	---	4.85679	1.92535	2.52255	0.184577	No	114154
ENSG00000224031	---	---	---	4.1768	1.65974	2.51654	0.120566	No	268806
ENSG00000215284	---	---	---	2.60106	1.03488	2.5134	0.28224	No	647068
ENSG00000047579	84062	DTNBP1	dystrobrevin binding protein 1	844.432	872.644	-1.03341	0.45415	No	1130912
ENSG00000252759	---	---	---	4.47286	1.78955	2.49943	0.118246	No	171070
ENSG00000100522	64841	GNPNAT1	glucosamine-phosphate N-acetyltransferase 1	6401.15	6614.96	-1.0334	0.180938	No	342318
ENSG00000240674	100271169	RPL21P51	ribosomal protein L21 pseudogene 51	1.29223	1.33539	-1.0334	0.970725	No	467224
ENSG00000260027	3217	HOXB7	homeobox B7	12.7786	13.2043	-1.03331	0.920076	No	1381176
ENSG00000144061	4867	NPHP1	nephrocystin 1	427.725	441.95	-1.03326	0.605461	No	298036
ENSG00000107882	51684	SUFU	SUFU negative regulator of hedgehog signaling	2882.07	2977.9	-1.03325	0.278979	No	384010
ENSG00000171570	---	---	---	7.28204	2.38368	3.05496	0.0355861	Yes	686174
ENSG00000255921	---	---	---	2.56795	1.03031	2.49241	0.222501	No	2564159
ENSG00000254512	---	---	---	6.96304	2.79631	2.49009	0.171483	No	127283
ENSG00000238151	---	---	---	2.95388	1.1898	2.48268	0.183103	No	3944674
ENSG00000265982	---	---	---	65.9614	21.6054	3.05301	9.066e-07	Yes	133455
ENSG00000228474	100128731	OST4	oligosaccharyltransferase complex subunit 4, non-catalytic	5816.29	6009.54	-1.03323	0.195149	No	410967
ENSG00000116679	10625	IVNS1ABP	influenza virus NS1A binding protein	7696.05	7951.74	-1.03322	0.165226	No	55730
ENSG00000237836	---	---	---	2.00587	0.810891	2.47366	0.241364	No	528820
ENSG00000269927	---	---	---	1.94707	0.788541	2.46921	0.249589	No	593757
ENSG00000186714	493860	CCDC73	coiled-coil domain containing 73	1.49278	1.54228	-1.03316	0.971641	No	197229
ENSG00000183762	83999	KREMEN1	kringle containing transmembrane protein 1	211.534	218.535	-1.03309	0.731825	No	407525
ENSG00000142621	114827	FHAD1	forkhead associated phosphopeptide binding domain 1	6.76874	6.99254	-1.03306	0.952403	No	3125631
ENSG00000167258	51755	CDK12	cyclin dependent kinase 12	6226.07	6431.76	-1.03304	0.181741	No	4924806
ENSG00000251022	100499177	THAP9-AS1	THAP9 antisense RNA 1	403.038	416.343	-1.03301	0.62632	No	136435
ENSG00000236502	100506108	SIX3-AS1	SIX3 antisense RNA 1	173.312	179.028	-1.03298	0.696092	No	687468
ENSG00000229953	---	---	---	15.6837	5.17775	3.02906	0.012334	Yes	1576965
ENSG00000273129	---	---	---	4.01504	1.32891	3.02131	0.0494506	Yes	918874
ENSG00000107331	20	ABCA2	ATP binding cassette subfamily A member 2	4179.63	4317.37	-1.03295	0.22281	No	867793
ENSG00000187994	126432	RINL	Ras and Rab interactor like	13.2497	13.6847	-1.03283	0.925663	No	23240
ENSG00000185515	79184	BRCC3	BRCA1/BRCA2-containing complex subunit 3	1217.9	1257.81	-1.03276	0.453524	No	202386
ENSG00000267786	---	---	---	5.50581	2.2351	2.46334	0.079765	No	1891976
ENSG00000225710	---	---	---	1.72932	0.703539	2.45803	0.277958	No	2722397
ENSG00000213261	647030	EEF1B2P6	eukaryotic translation elongation factor 1 beta 2 pseudogene 6	50.4941	52.135	-1.0325	0.851556	No	1689800
ENSG00000272275	---	---	---	6.28557	2.55853	2.45671	0.0564046	No	882042
ENSG00000138756	55589	BMP2K	BMP2 inducible kinase	3609.44	3726.2	-1.03235	0.271196	No	668262
ENSG00000121542	26984	SEC22A	SEC22 homolog A, vesicle trafficking protein	778.368	803.401	-1.03216	0.532534	No	65051
ENSG00000077380	1781	DYNC1I2	dynein cytoplasmic 1 intermediate chain 2	9287.38	9585.98	-1.03215	0.157527	No	16855
ENSG00000232117	---	---	---	1.99108	0.810891	2.45543	0.278437	No	456313
ENSG00000250644	---	---	---	96.0712	31.9833	3.0038	5.6513e-07	Yes	470662
ENSG00000199691	---	---	---	4.66336	1.90006	2.45432	0.0776076	No	660399
ENSG00000270024	---	---	---	4.55232	1.85942	2.44824	0.197027	No	645191
ENSG00000261161	---	---	---	3.90533	1.30107	3.00164	0.0485968	Yes	381900
ENSG00000054965	23201	FAM168A	family with sequence similarity 168 member A	6041.94	6235.87	-1.0321	0.171338	No	2298696
ENSG00000258696	---	---	---	2.80074	1.14521	2.44562	0.196674	No	261818
ENSG00000106605	644	BLVRA	biliverdin reductase A	2717.38	2804.58	-1.03209	0.253887	No	178548
ENSG00000272851	---	---	---	6.07706	2.49328	2.43738	0.142923	No	326286
ENSG00000270898	---	---	---	2.42389	0.994984	2.43611	0.243041	No	254652
ENSG00000229771	---	---	---	2.60968	1.07174	2.43499	0.163271	No	278544
ENSG00000164880	26173	INTS1	integrator complex subunit 1	11838.2	12218	-1.03209	0.140647	No	178291
ENSG00000182957	221178	SPATA13	spermatogenesis associated 13	921.384	950.918	-1.03205	0.402745	No	2508626
ENSG00000174799	9662	CEP135	centrosomal protein 135	1331.44	1374.11	-1.03205	0.398073	No	310516
ENSG00000204435	1460	CSNK2B	casein kinase 2 beta	1674.73	1728.31	-1.032	0.381341	No	616319
ENSG00000244693	---	---	---	4.69151	1.92951	2.43145	0.135186	No	2661063
ENSG00000238339	---	---	---	2.4531	1.00968	2.42957	0.210285	No	1266961
ENSG00000229704	---	---	---	1.84761	0.765225	2.41446	0.278287	No	592190
ENSG00000219507	---	---	---	3102.7	1040.17	2.98287	1.12553e-12	Yes	1770557
ENSG00000267848	---	---	---	3.9316	1.62975	2.41239	0.112193	No	651588
ENSG00000251161	---	---	---	20.0995	6.7463	2.97934	0.00622967	Yes	1095324
ENSG00000230769	---	---	---	2.39701	0.995177	2.40862	0.241743	No	609281
ENSG00000168116	57691	KIAA1586	KIAA1586	1185.26	1223.15	-1.03196	0.439514	No	6029835
ENSG00000073711	5523	PPP2R3A	protein phosphatase 2 regulatory subunit B''alpha	2902.33	2994.83	-1.03187	0.260451	No	517175
ENSG00000151131	121053	NOPCHAP1	NOP protein chaperone 1	289.05	298.26	-1.03186	0.672264	No	213586
ENSG00000234390	158572	USP27X-DT	USP27X divergent transcript	55.9518	57.7336	-1.03184	0.829803	No	144089
ENSG00000253102	---	---	---	7.18956	2.98702	2.40693	0.161773	No	3144042
ENSG00000270828	---	---	---	2.02708	0.84333	2.40366	0.246605	No	260919
ENSG00000234203	---	---	---	3.86406	1.61102	2.39852	0.150462	No	752494
ENSG00000228061	---	---	---	1.8349	0.765225	2.39786	0.250621	No	191707
ENSG00000223787	---	---	---	3.38362	1.41173	2.39679	0.166286	No	146591
ENSG00000259782	---	---	---	2.66125	1.11042	2.39661	0.242114	No	1109176
ENSG00000101638	29906	ST8SIA5	ST8 alpha-N-acetyl-neuraminide alpha-2,8-sialyltransferase 5	3.12894	3.22853	-1.03183	0.956649	No	1273605
ENSG00000215221	---	---	---	9.49977	3.96398	2.39652	0.0756048	No	1813630
ENSG00000168958	56947	MFF	mitochondrial fission factor	4400.71	4540.53	-1.03177	0.208632	No	860029
ENSG00000140990	4716	NDUFB10	NADH:ubiquinone oxidoreductase subunit B10	4790.65	4942.83	-1.03177	0.228189	No	343307
ENSG00000135390	517	ATP5MC2	ATP synthase membrane subunit c locus 2	7555.15	7794.25	-1.03165	0.200016	No	40411
ENSG00000246145	100505676	RRS1-DT	RRS1 divergent transcript	16.4975	17.0188	-1.0316	0.915023	No	513075
ENSG00000183208	390637	GDPGP1	GDP-D-glucose phosphorylase 1	81.9642	84.5516	-1.03157	0.811087	No	511748
ENSG00000269947	---	---	---	7.77138	3.24359	2.39592	0.0813762	No	1339983
ENSG00000269899	---	---	---	53.462	18.0755	2.95771	1.08461e-05	Yes	1305194
ENSG00000270949	---	---	---	193.578	65.4681	2.95684	9.72288e-08	Yes	44976
ENSG00000213860	728501	RPL21P75	ribosomal protein L21 pseudogene 75	87.1504	89.8998	-1.03155	0.821283	No	2146038
ENSG00000257815	101928062	PRANCR	progenitor renewal associated non-coding RNA	80.5984	83.131	-1.03142	0.805389	No	484873
ENSG00000167674	84717	HDGFL2	HDGF like 2	7572.49	7810.23	-1.03139	0.210848	No	140952
ENSG00000214922	285830	HLA-F-AS1	HLA-F antisense RNA 1	137.043	141.342	-1.03136	0.743981	No	710069
ENSG00000218682	---	---	---	1.72295	0.721921	2.38662	0.290875	No	24140
ENSG00000263648	---	---	---	2.11922	0.888804	2.38435	0.225492	No	773281
ENSG00000166986	4141	MARS1	methionyl-tRNA synthetase 1	11437.6	11796.1	-1.03135	0.234083	No	127514
ENSG00000200181	---	---	---	2.72079	1.14187	2.38276	0.173031	No	382730
ENSG00000272403	---	---	---	9.3093	3.9105	2.38059	0.0677945	No	374492
ENSG00000104960	53635	PTOV1	PTOV1 extended AT-hook containing adaptor protein	4449.27	4588.43	-1.03128	0.278333	No	561477
ENSG00000239306	10432	RBM14	RNA binding motif protein 14	4608.55	4752.55	-1.03125	0.252611	No	1209616
ENSG00000204590	2794	GNL1	G protein nucleolar 1 (putative)	5903.14	6087.52	-1.03123	0.188385	No	97717
ENSG00000272646	---	---	---	5.36433	2.25337	2.38058	0.131059	No	567262
ENSG00000230207	158345	RPL4P5	ribosomal protein L4 pseudogene 5	978.949	1009.5	-1.03121	0.44005	No	1092821
ENSG00000235262	---	---	---	2.18303	0.917194	2.38012	0.277571	No	1352896
ENSG00000236474	---	---	---	2.05593	0.867592	2.3697	0.311614	No	181261
ENSG00000217239	100133294	RPL34P16	ribosomal protein L34 pseudogene 16	10.2493	10.5691	-1.0312	0.951386	No	907293
ENSG00000222011	222234	FAM185A	family with sequence similarity 185 member A	287.105	296.048	-1.03115	0.731782	No	1074070
ENSG00000250796	---	---	---	4.9426	2.0883	2.3668	0.0994736	No	130857
ENSG00000230665	---	---	---	2.3534	0.995177	2.36481	0.201557	No	116353
ENSG00000235077	---	---	---	2.27857	0.965305	2.36046	0.233047	No	565732
ENSG00000226643	---	---	---	1.97846	0.84333	2.34601	0.32479	No	155260
ENSG00000249240	---	---	---	7.24088	3.0881	2.34477	0.140663	No	462934
ENSG00000132405	57533	TBC1D14	TBC1 domain family member 14	4283.13	4416.53	-1.03115	0.264911	No	5317684
ENSG00000140743	1039	CDR2	cerebellar degeneration related protein 2	3044.42	3138.62	-1.03094	0.282185	No	99059
ENSG00000108671	5717	PSMD11	proteasome 26S subunit, non-ATPase 11	9078.31	9358.76	-1.03089	0.154176	No	204215
ENSG00000219163	---	---	---	2.27857	0.972877	2.34209	0.196973	No	2219582
ENSG00000025293	51230	PHF20	PHD finger protein 20	3756.12	3872.12	-1.03088	0.299619	No	570295
ENSG00000268051	---	---	---	1.68979	0.721921	2.34068	0.300594	No	124008
ENSG00000116871	55700	MAP7D1	MAP7 domain containing 1	21477.7	22137.8	-1.03074	0.183742	No	1065716
ENSG00000145555	4651	MYO10	myosin X	11921.2	12286.3	-1.03062	0.266312	No	1529835
ENSG00000233351	---	---	---	5.77066	2.46826	2.33795	0.0844403	No	89483
ENSG00000138035	87178	PNPT1	polyribonucleotide nucleotidyltransferase 1	2988.36	3079.78	-1.03059	0.415223	No	367556
ENSG00000260682	---	---	---	1.53928	0.659354	2.33453	0.317412	No	2500735
ENSG00000214485	6174	RPL7P1	ribosomal protein L7 pseudogene 1	1278.13	1317.07	-1.03046	0.455914	No	1984388
ENSG00000213741	6235	RPS29	ribosomal protein S29	4952.29	5103.07	-1.03045	0.494998	No	218185
ENSG00000226632	---	---	---	4.51293	1.93632	2.33068	0.155988	No	425158
ENSG00000151239	5756	TWF1	twinfilin actin binding protein 1	9513.8	9802.76	-1.03037	0.21537	No	249817
ENSG00000234225	---	---	---	32.9359	11.3281	2.90745	0.000265678	Yes	4699
ENSG00000114904	6787	NEK4	NIMA related kinase 4	2219.86	2287.23	-1.03035	0.309571	No	442673
ENSG00000235672	---	---	---	4.81455	2.06669	2.3296	0.168475	No	219950
ENSG00000143390	5993	RFX5	regulatory factor X5	4036.07	4158.5	-1.03034	0.257785	No	1317089
ENSG00000272823	---	---	---	5.80295	2.49499	2.32584	0.223405	No	37211
ENSG00000130856	7776	ZNF236	zinc finger protein 236	1054.99	1086.98	-1.03033	0.420455	No	26639028
ENSG00000188765	---	---	---	2.26923	0.975974	2.32509	0.231936	No	4682327
ENSG00000196674	---	---	---	2.97611	1.28219	2.3211	0.203445	No	283457
ENSG00000235090	---	---	---	2.12513	0.917194	2.31699	0.259989	No	198837
ENSG00000099284	55506	MACROH2A2	macroH2A.2 histone	1982.46	2042.49	-1.03028	0.383115	No	1258970
ENSG00000269653	---	---	---	5.13502	1.7752	2.89264	0.0470773	Yes	344531
ENSG00000240935	285189	PLGLA	plasminogen like A (pseudogene)	1.83073	1.88603	-1.03021	0.97219	No	293615
ENSG00000207342	---	---	---	3.03608	1.31094	2.31596	0.217731	No	14373
ENSG00000124784	83732	RIOK1	RIO kinase 1	1306.58	1345.92	-1.03011	0.41792	No	2508091
ENSG00000259630	---	---	---	5.28277	1.82942	2.88767	0.0360483	Yes	1858
ENSG00000254991	---	---	---	6.25907	2.71005	2.30958	0.197635	No	545172
ENSG00000150630	7424	VEGFC	vascular endothelial growth factor C	3033.29	3124.25	-1.02999	0.30881	No	1949384
ENSG00000232303	100422581	DFFBP1	DNA fragmentation factor subunit beta pseudogene 1	18.0844	18.6262	-1.02996	0.919369	No	160632
ENSG00000238061	---	---	---	2.58656	1.12003	2.30936	0.297209	No	19246
ENSG00000171988	221037	JMJD1C	jumonji domain containing 1C	7133.45	7347.12	-1.02995	0.308376	No	415058
ENSG00000166797	84191	CIAO2A	cytosolic iron-sulfur assembly component 2A	2517.75	2593.02	-1.0299	0.344894	No	130317
ENSG00000267778	---	---	---	4.5897	1.9879	2.30881	0.179472	No	1890236
ENSG00000267052	---	---	---	9.31804	4.03901	2.30701	0.0588607	No	119654
ENSG00000170604	26145	IRF2BP1	interferon regulatory factor 2 binding protein 1	1896.67	1953.24	-1.02983	0.456834	No	160079
ENSG00000257877	---	---	---	3.55458	1.54304	2.30362	0.183682	No	94915
ENSG00000197580	83875	BCO2	beta-carotene oxygenase 2	21.7161	22.3621	-1.02975	0.904425	No	1491055
ENSG00000273055	---	---	---	2.71675	1.17958	2.30315	0.229477	No	844429
ENSG00000131116	126299	ZNF428	zinc finger protein 428	2137.4	2200.96	-1.02973	0.317304	No	373564
ENSG00000265254	---	---	---	4.15294	1.80875	2.29603	0.168422	No	1393254
ENSG00000266824	---	---	---	5.23542	2.28279	2.29343	0.0962477	No	1440934
ENSG00000043093	54165	DCUN1D1	defective in cullin neddylation 1 domain containing 1	3100.15	3192.06	-1.02965	0.347038	No	1155043
ENSG00000257403	---	---	---	4.66336	1.62975	2.86139	0.0379638	Yes	657504
ENSG00000149532	79869	CPSF7	cleavage and polyadenylation specific factor 7	6589.8	6784.29	-1.02951	0.191953	No	507548
ENSG00000255202	---	---	---	22.3453	7.81404	2.85963	0.003155	Yes	98229
ENSG00000107758	5532	PPP3CB	protein phosphatase 3 catalytic subunit beta	7837.48	8067.63	-1.02937	0.197714	No	957025
ENSG00000265798	---	---	---	2.20093	0.961323	2.28948	0.29276	No	181812
ENSG00000239919	---	---	---	2.35401	1.0288	2.28812	0.240424	No	153236
ENSG00000230068	---	---	---	4.68602	2.04935	2.28659	0.141089	No	2783785
ENSG00000173744	3267	AGFG1	ArfGAP with FG repeats 1	5862.01	6034.08	-1.02935	0.256047	No	713028
ENSG00000250090	---	---	---	2.52032	1.10244	2.28614	0.278437	No	124082
ENSG00000235903	100509894	CPB2-AS1	CPB2 antisense RNA 1	3.2056	3.29961	-1.02933	0.963604	No	1090374
ENSG00000227256	---	---	---	2.30515	1.00968	2.28304	0.272385	No	49808
ENSG00000228540	---	---	---	2.07199	0.912827	2.26986	0.230833	No	298246
ENSG00000255670	---	---	---	3.54552	1.56565	2.26457	0.225614	No	577284
ENSG00000254041	---	---	---	2.56033	1.13273	2.26032	0.227055	No	5077511
ENSG00000227200	---	---	---	10.5693	3.7099	2.84894	0.0109029	Yes	563406
ENSG00000273464	---	---	---	3.7448	1.66129	2.25415	0.148454	No	2561399
ENSG00000258441	283624	LINC00641	long intergenic non-protein coding RNA 641	770.747	793.333	-1.0293	0.530763	No	56574
ENSG00000240618	---	---	---	3.83098	1.69966	2.25398	0.297955	No	1594853
ENSG00000268423	---	---	---	2.65838	1.17958	2.25366	0.206274	No	554097
ENSG00000250011	---	---	---	4.42122	1.97269	2.24121	0.285415	No	742960
ENSG00000081692	65094	JMJD4	jumonji domain containing 4	1295.69	1333.64	-1.02929	0.409332	No	182982
ENSG00000241685	10552	ARPC1A	actin related protein 2/3 complex subunit 1A	12264.8	12622.9	-1.0292	0.170993	No	238820
ENSG00000150753	22948	CCT5	chaperonin containing TCP1 subunit 5	24307.6	25017.2	-1.02919	0.142726	No	1341338
ENSG00000258303	---	---	---	2.26192	1.00968	2.24023	0.212697	No	1713020
ENSG00000272033	---	---	---	1.9899	0.889379	2.23741	0.299915	No	551682
ENSG00000256566	---	---	---	7.63753	2.69204	2.83708	0.0282759	Yes	152094
ENSG00000250441	---	---	---	2.40418	1.0759	2.23458	0.257073	No	520676
ENSG00000235449	---	---	---	9.63386	4.31363	2.23335	0.0664457	No	1199021
ENSG00000260366	---	---	---	2.30652	1.03663	2.22502	0.285915	No	343131
ENSG00000167524	124923	RSKR	ribosomal protein S6 kinase related	53.6975	55.2613	-1.02912	0.857017	No	1184295
ENSG00000203635	---	---	---	2.27857	1.025	2.22299	0.22132	No	6718483
ENSG00000254858	84769	MPV17L2	MPV17 mitochondrial inner membrane protein like 2	1034.88	1064.94	-1.02905	0.455549	No	570743
ENSG00000247679	---	---	---	114.513	40.523	2.82587	1.95899e-07	Yes	854093
ENSG00000093183	9117	SEC22C	SEC22 homolog C, vesicle trafficking protein	4843.21	4983.73	-1.02901	0.288753	No	25487
ENSG00000237749	---	---	---	2.20914	0.995177	2.21985	0.231925	No	334431
ENSG00000254418	---	---	---	65.0317	23.0423	2.82228	4.27879e-06	Yes	1241650
ENSG00000215424	114044	MCM3AP-AS1	MCM3AP antisense RNA 1	194.141	199.755	-1.02891	0.765777	No	709538
ENSG00000229585	---	---	---	5.06064	2.28537	2.21437	0.174985	No	56594
ENSG00000268745	---	---	---	2.25522	1.01953	2.21203	0.272075	No	1939170
ENSG00000272468	---	---	---	45.4929	16.1436	2.81802	1.99344e-05	Yes	356227
ENSG00000204622	3137	HLA-J	major histocompatibility complex, class I, J (pseudogene)	5.79664	5.96355	-1.02879	0.955351	No	452534
ENSG00000162244	6159	RPL29	ribosomal protein L29	26800.3	27570.8	-1.02875	0.162105	No	125464
ENSG00000204055	---	---	---	8.86021	4.01314	2.2078	0.129973	No	2408485
ENSG00000223886	100131785	LOC100131785	ring finger protein 181 pseudogene	3.0623	3.15002	-1.02864	0.962273	No	169570
ENSG00000008838	9862	MED24	mediator complex subunit 24	4992.59	5135.35	-1.02859	0.316506	No	4325103
ENSG00000266010	100128893	GATA6-AS1	GATA6 antisense RNA 1 (head to head)	49.9233	51.3502	-1.02858	0.884063	No	477927
ENSG00000272709	---	---	---	2.88761	1.31094	2.20271	0.254582	No	236009
ENSG00000259784	---	---	---	3.15464	1.43605	2.19674	0.219158	No	167806
ENSG00000215012	79680	RTL10	retrotransposon Gag like 10	2201.64	2264.54	-1.02857	0.37047	No	19767
ENSG00000272420	---	---	---	9.29581	4.23467	2.19517	0.0512665	No	91
ENSG00000260633	---	---	---	13.1221	4.68015	2.80378	0.0167032	Yes	2133616
ENSG00000168389	84879	MFSD2A	major facilitator superfamily domain containing 2A	389.487	400.615	-1.02857	0.676358	No	2733390
ENSG00000144909	114885	OSBPL11	oxysterol binding protein like 11	1983.7	2040.37	-1.02856	0.416974	No	994622
ENSG00000186073	84529	CDIN1	CDAN1 interacting nuclease 1	790.875	813.415	-1.0285	0.508928	No	3231500
ENSG00000148399	92715	DPH7	diphthamide biosynthesis 7	1693.67	1741.9	-1.02847	0.464453	No	1417813
ENSG00000215864	---	---	---	10.4623	3.74056	2.79698	0.00943373	Yes	2947346
ENSG00000133131	79710	MORC4	MORC family CW-type zinc finger 4	3699.59	3804.52	-1.02836	0.282161	No	446441
ENSG00000181789	22820	COPG1	COPI coat complex subunit gamma 1	13714.2	14102.7	-1.02833	0.194716	No	510839
ENSG00000116035	25806	VAX2	ventral anterior homeobox 2	227.837	234.285	-1.0283	0.724911	No	1148324
ENSG00000109445	27309	ZNF330	zinc finger protein 330	2213.4	2275.81	-1.0282	0.322467	No	138609
ENSG00000252274	124904115	LOC124904115	small Cajal body-specific RNA 24	3.39203	3.48763	-1.02818	0.965078	No	2357741
ENSG00000272650	---	---	---	9.01433	3.23546	2.78611	0.0253585	Yes	45940
ENSG00000091073	113878	DTX2	deltex E3 ubiquitin ligase 2	707.051	726.977	-1.02818	0.701123	No	257067
ENSG00000249212	---	---	---	2.8397	1.29619	2.19081	0.201726	No	740345
ENSG00000149657	149986	LSM14B	LSM family member 14B	3039.36	3125.01	-1.02818	0.344095	No	1235409
ENSG00000223711	---	---	---	5.59982	2.55912	2.18818	0.139445	No	495634
ENSG00000136933	10244	RABEPK	Rab9 effector protein with kelch motifs	1700.99	1748.45	-1.0279	0.381282	No	373602
ENSG00000205534	---	---	---	272.552	98.0467	2.77982	9.197e-09	Yes	834790
ENSG00000271344	---	---	---	26.2665	9.46916	2.77389	0.00750742	Yes	134430
ENSG00000125122	26231	FBXL9P	F-box and leucine rich repeat protein, pseudogene	116.421	119.667	-1.02788	0.788864	No	3742812
ENSG00000251254	---	---	---	4.37416	2.01169	2.17437	0.272466	No	840162
ENSG00000155636	129831	RBM45	RNA binding motif protein 45	812.097	834.723	-1.02786	0.527089	No	254525
ENSG00000153666	---	---	---	2.32775	1.07174	2.17194	0.260451	No	351635
ENSG00000084093	5978	REST	RE1 silencing transcription factor	4540.05	4666.01	-1.02774	0.35904	No	329125
ENSG00000269318	---	---	---	15.5955	7.1862	2.1702	0.0533572	No	254792
ENSG00000255449	---	---	---	1.90689	0.879487	2.16818	0.31203	No	390464
ENSG00000203386	---	---	---	172.399	62.3788	2.76375	3.89135e-08	Yes	790192
ENSG00000110801	5715	PSMD9	proteasome 26S subunit, non-ATPase 9	1297.26	1333.16	-1.02767	0.533644	No	648629
ENSG00000233040	---	---	---	4.9161	1.77935	2.76286	0.0441746	Yes	600098
ENSG00000215785	---	---	---	2.02143	0.933751	2.16485	0.263244	No	597183
ENSG00000164117	26269	FBXO8	F-box protein 8	848.601	872.055	-1.02764	0.540666	No	648449
ENSG00000257443	---	---	---	2.4594	1.13683	2.16337	0.263583	No	862745
ENSG00000155428	378108	TRIM74	tripartite motif containing 74	4.06652	4.17878	-1.02761	0.967965	No	121213
ENSG00000252009	---	---	---	3.99695	1.84793	2.16293	0.193054	No	1403109
ENSG00000221246	---	---	---	2.98728	1.38811	2.15205	0.270729	No	656873
ENSG00000261962	---	---	---	3.88425	1.80728	2.14922	0.159	No	609498
ENSG00000272910	---	---	---	3.02049	1.40927	2.1433	0.218628	No	856268
ENSG00000270599	---	---	---	4.72007	2.20618	2.13947	0.190137	No	1343125
ENSG00000267018	---	---	---	11.1931	4.07119	2.74935	0.0134468	Yes	3624586
ENSG00000253971	---	---	---	6.35951	2.97551	2.13729	0.193458	No	460972
ENSG00000123349	5204	PFDN5	prefoldin subunit 5	9217.87	9471.99	-1.02757	0.294838	No	341332
ENSG00000259618	---	---	---	2.02656	0.950349	2.13244	0.370601	No	923943
ENSG00000236166	---	---	---	7.25544	3.40708	2.12952	0.0917364	No	199264
ENSG00000215030	388344	RPL13P12	ribosomal protein L13 pseudogene 12	3823.64	3928.62	-1.02746	0.441368	No	22929
ENSG00000165891	144455	E2F7	E2F transcription factor 7	4497.89	4621.17	-1.02741	0.416718	No	302272
ENSG00000256596	---	---	---	3.1718	1.4937	2.12345	0.249701	No	266322
ENSG00000258230	---	---	---	4.88233	2.30012	2.12265	0.179809	No	527770
ENSG00000144455	285362	SUMF1	sulfatase modifying factor 1	4212.22	4327.42	-1.02735	0.442912	No	2874879
ENSG00000223249	---	---	---	2.10765	0.995177	2.11786	0.338755	No	164073
ENSG00000213453	---	---	---	101.322	36.9621	2.74124	4.97141e-06	Yes	356384
ENSG00000204805	---	---	---	7.33583	3.46733	2.1157	0.120703	No	2758844
ENSG00000143947	6233	RPS27A	ribosomal protein S27a	22660	23279.5	-1.02734	0.37725	No	93933
ENSG00000251521	---	---	---	3.26581	1.54425	2.11482	0.3526	No	6058
ENSG00000188342	2963	GTF2F2	general transcription factor IIF subunit 2	5219.19	5361.74	-1.02731	0.279985	No	158083
ENSG00000111652	50813	COPS7A	COP9 signalosome subunit 7A	5188.52	5330.19	-1.0273	0.301249	No	652496
ENSG00000155096	51582	AZIN1	antizyme inhibitor 1	13488.9	13855.9	-1.02721	0.196279	No	2782769
ENSG00000272836	---	---	---	10.3891	4.9157	2.11345	0.0632084	No	185954
ENSG00000171522	5734	PTGER4	prostaglandin E receptor 4	921.558	946.552	-1.02712	0.608333	No	2185257
ENSG00000108883	9343	EFTUD2	elongation factor Tu GTP binding domain containing 2	8219.41	8441.44	-1.02701	0.22677	No	434028
ENSG00000143258	27005	USP21	ubiquitin specific peptidase 21	1456.14	1495.45	-1.02699	0.456259	No	264687
ENSG00000207709	---	---	---	2.64204	1.25023	2.11324	0.262713	No	1107397
ENSG00000225447	---	---	---	2.28348	1.08416	2.10623	0.328382	No	521336
ENSG00000252150	---	---	---	5.96928	2.83785	2.10345	0.146933	No	924108
ENSG00000257286	---	---	---	2.75969	1.31203	2.10337	0.278001	No	568615
ENSG00000236813	---	---	---	2.26839	1.08056	2.09928	0.344412	No	533503
ENSG00000185085	80789	INTS5	integrator complex subunit 5	1822.71	1871.83	-1.02695	0.383347	No	274276
ENSG00000228415	---	---	---	2.08798	0.994984	2.09851	0.30981	No	174176
ENSG00000265118	---	---	---	1.76851	0.84333	2.09706	0.383115	No	77211
ENSG00000239789	51373	MRPS17	mitochondrial ribosomal protein S17	446.71	458.731	-1.02691	0.640097	No	594408
ENSG00000227198	---	---	---	1.95746	0.933751	2.09634	0.344065	No	623226
ENSG00000216866	286444	RPS2P55	ribosomal protein S2 pseudogene 55	3727.87	3828.05	-1.02688	0.329213	No	1793481
ENSG00000182446	55666	NPLOC4	NPL4 homolog, ubiquitin recognition factor	13790.4	14160.4	-1.02683	0.207504	No	834279
ENSG00000227782	---	---	---	7.49997	3.58244	2.09354	0.100604	No	345991
ENSG00000172922	84153	RNASEH2C	ribonuclease H2 subunit C	2395.36	2459.57	-1.02681	0.475675	No	2105252
ENSG00000262140	---	---	---	3.8072	1.82489	2.08626	0.188826	No	405017
ENSG00000259529	---	---	---	148.551	54.9237	2.70467	1.20196e-07	Yes	882967
ENSG00000250290	---	---	---	2.45687	1.17958	2.08283	0.253128	No	2668168
ENSG00000260523	---	---	---	9.56516	4.59919	2.07975	0.057236	No	2226468
ENSG00000169733	5986	RFNG	RFNG O-fucosylpeptide 3-beta-N-acetylglucosaminyltransferase	1694.61	1739.98	-1.02677	0.423081	No	941096
ENSG00000231842	---	---	---	3.50471	1.68547	2.07937	0.2188	No	175290
ENSG00000183889	---	---	---	67.3402	24.9507	2.69893	0.0282181	Yes	2179299
ENSG00000231210	---	---	---	4.4473	2.13946	2.07871	0.217219	No	241243
ENSG00000135845	5279	PIGC	phosphatidylinositol glycan anchor biosynthesis class C	1256.19	1289.67	-1.02665	0.471867	No	433769
ENSG00000259081	---	---	---	4.13084	1.9879	2.07799	0.192307	No	259518
ENSG00000272356	---	---	---	32.8448	12.2001	2.69218	0.00203562	Yes	34359
ENSG00000260672	---	---	---	3.90456	1.87918	2.0778	0.240702	No	150864
ENSG00000248476	---	---	---	49.9341	18.571	2.68882	6.32224e-05	Yes	2867170
ENSG00000134602	51765	STK26	serine/threonine kinase 26	1610.71	1653.61	-1.02664	0.478993	No	866831
ENSG00000250130	---	---	---	6.07706	2.92494	2.07767	0.113439	No	115819
ENSG00000202533	---	---	---	3.8622	1.86286	2.07327	0.226671	No	340540
ENSG00000259619	---	---	---	2.55332	1.23286	2.07106	0.281455	No	1884751
ENSG00000155254	83742	MARVELD1	MARVEL domain containing 1	12759.2	13097.8	-1.02654	0.219529	No	820074
ENSG00000174368	---	---	---	7.61117	3.68008	2.06821	0.106536	No	231391
ENSG00000241962	---	---	---	9.13962	4.41971	2.06792	0.117136	No	447107
ENSG00000105520	64748	PLPPR2	phospholipid phosphatase related 2	3558.38	3652.79	-1.02653	0.474597	No	397030
ENSG00000100347	25813	SAMM50	SAMM50 sorting and assembly machinery component	3030.15	3110.4	-1.02648	0.370115	No	196980
ENSG00000270116	---	---	---	10.4784	3.91144	2.67891	0.03937	Yes	133303
ENSG00000270031	---	---	---	6.60243	3.19581	2.06597	0.125653	No	634718
ENSG00000226677	---	---	---	3.28399	1.59063	2.06458	0.207926	No	278144
ENSG00000202058	106479130	RN7SKP80	RN7SK pseudogene 80	1.85577	1.90491	-1.02648	0.971584	No	1139217
ENSG00000269886	---	---	---	3.97693	1.92899	2.06166	0.31301	No	247345
ENSG00000086504	10573	MRPL28	mitochondrial ribosomal protein L28	4035.73	4142.59	-1.02648	0.35182	No	50428
ENSG00000162526	81629	TSSK3	testis specific serine kinase 3	5.90114	6.05723	-1.02645	0.958855	No	494531
ENSG00000259205	---	---	---	24.2467	9.06952	2.67343	0.00639046	Yes	187133
ENSG00000162065	57465	TBC1D24	TBC1 domain family member 24	969.743	995.303	-1.02636	0.479212	No	206625
ENSG00000114388	10641	NPRL2	NPR2 like, GATOR1 complex subunit	961.62	986.905	-1.02629	0.535504	No	659244
ENSG00000249911	---	---	---	2.48136	1.20367	2.0615	0.282199	No	4033137
ENSG00000260186	---	---	---	7.63367	3.70764	2.0589	0.100899	No	96919
ENSG00000249096	---	---	---	2.35775	1.14521	2.05879	0.357928	No	657526
ENSG00000167113	51117	COQ4	coenzyme Q4	1979.84	2031.89	-1.02629	0.423557	No	1585817
ENSG00000243107	---	---	---	19.9662	7.48584	2.6672	0.00538892	Yes	128657
ENSG00000174840	201626	PDE12	phosphodiesterase 12	4148.83	4257.89	-1.02629	0.336938	No	278301
ENSG00000272529	---	---	---	2.26916	1.10244	2.05831	0.303902	No	1514083
ENSG00000267526	---	---	---	4.24732	2.06394	2.05787	0.200941	No	408064
ENSG00000166526	7551	ZNF3	zinc finger protein 3	1297.23	1331.25	-1.02622	0.479565	No	517315
ENSG00000273450	---	---	---	11.4655	5.57581	2.05628	0.0581616	No	487049
ENSG00000241945	5822	PWP2	PWP2 small subunit processome component	2239.51	2298.14	-1.02618	0.379175	No	1109660
ENSG00000260316	---	---	---	3.46482	1.68547	2.0557	0.226453	No	36013
ENSG00000273183	---	---	---	2.56986	1.25023	2.0555	0.24032	No	734686
ENSG00000267059	---	---	---	2.09391	1.01953	2.05381	0.35338	No	1522971
ENSG00000261372	---	---	---	2.8235	1.37489	2.05362	0.296193	No	1093961
ENSG00000132718	23208	SYT11	synaptotagmin 11	8142.25	8355.22	-1.02616	0.265755	No	2378880
ENSG00000263105	---	---	---	3.98037	1.93984	2.05191	0.239967	No	120788
ENSG00000267620	---	---	---	8.0145	3.91043	2.04952	0.107402	No	9968253
ENSG00000164815	5001	ORC5	origin recognition complex subunit 5	1401.45	1437.97	-1.02606	0.481724	No	384573
ENSG00000218426	389435	RPL27AP6	ribosomal protein L27a pseudogene 6	105.361	108.095	-1.02595	0.878881	No	145548
ENSG00000134183	2780	GNAT2	G protein subunit alpha transducin 2	5.10735	5.23986	-1.02594	0.958922	No	1121560
ENSG00000223653	---	---	---	8.47715	4.14416	2.04557	0.203823	No	242692
ENSG00000138495	10063	COX17	cytochrome c oxidase copper chaperone COX17	908.47	932.033	-1.02594	0.599603	No	1769212
ENSG00000159216	861	RUNX1	RUNX family transcription factor 1	5248.6	5384.48	-1.02589	0.340708	No	962286
ENSG00000251609	---	---	---	3.40199	1.6681	2.03944	0.230362	No	15702
ENSG00000267093	---	---	---	5.80089	2.84525	2.0388	0.191163	No	3328691
ENSG00000173409	64801	ARV1	ARV1 homolog, fatty acid homeostasis modulator	997.885	1023.65	-1.02582	0.522453	No	561756
ENSG00000017260	27032	ATP2C1	ATPase secretory pathway Ca2+ transporting 1	11334.4	11626.8	-1.0258	0.233419	No	2111829
ENSG00000259066	---	---	---	6.96679	3.41848	2.03798	0.138925	No	238751
ENSG00000273454	---	---	---	5.56968	2.73359	2.0375	0.198273	No	9877
ENSG00000090932	10683	DLL3	delta like canonical Notch ligand 3	44.6502	45.7966	-1.02568	0.901743	No	558061
ENSG00000138080	11117	EMILIN1	elastin microfibril interfacer 1	11.0497	11.3327	-1.02561	0.953232	No	417762
ENSG00000213590	---	---	---	1.43277	0.703539	2.03652	0.429422	No	774719
ENSG00000266620	---	---	---	1.80988	0.888804	2.03631	0.380652	No	397231
ENSG00000225931	---	---	---	4.2244	2.07473	2.03612	0.251336	No	202121
ENSG00000255680	---	---	---	4.08611	2.00683	2.03611	0.334544	No	370230
ENSG00000243696	---	---	---	13.177	6.4751	2.03502	0.14652	No	377893
ENSG00000265458	---	---	---	16.2622	7.99718	2.03349	0.0914207	No	534406
ENSG00000272037	---	---	---	2.02219	0.995177	2.03199	0.349553	No	2145298
ENSG00000261684	---	---	---	3.60832	1.77751	2.02999	0.252152	No	350733
ENSG00000165280	7415	VCP	valosin containing protein	38699.2	39686	-1.0255	0.159607	No	129661
ENSG00000268836	---	---	---	8.33174	4.10633	2.029	0.0651761	No	133315
ENSG00000269242	---	---	---	2.46711	1.21651	2.02801	0.29729	No	895631
ENSG00000097096	84144	SYDE2	synapse defective Rho GTPase homolog 2	379.285	388.95	-1.02548	0.782908	No	223310
ENSG00000254536	---	---	---	1.8859	0.930064	2.02771	0.397602	No	697313
ENSG00000271849	---	---	---	9.28153	4.58153	2.02586	0.0719888	No	338575
ENSG00000185947	10308	ZNF267	zinc finger protein 267	707.718	725.745	-1.02547	0.559847	No	30761
ENSG00000271474	---	---	---	5.35772	2.64504	2.02557	0.132213	No	2639333
ENSG00000224316	100420546	GTF2IP5	general transcription factor IIi pseudogene 5	3.34296	3.42795	-1.02543	0.965078	No	159940
ENSG00000265625	---	---	---	3.3628	1.66129	2.02421	0.287174	No	152648
ENSG00000231970	---	---	---	5.81052	2.87495	2.02108	0.138833	No	508016
ENSG00000122958	9559	VPS26A	VPS26 retromer complex component A	12934.8	13262.8	-1.02536	0.243256	No	749611
ENSG00000272918	---	---	---	15.6332	5.93967	2.632	0.00641606	Yes	71798
ENSG00000253333	---	---	---	4.46542	2.21325	2.01759	0.233666	No	2544704
ENSG00000004779	4706	NDUFAB1	NADH:ubiquinone oxidoreductase subunit AB1	3083.27	3161.44	-1.02535	0.372662	No	1177473
ENSG00000089876	55760	DHX32	DEAH-box helicase 32 (putative)	3190.8	3271.62	-1.02533	0.363101	No	407839
ENSG00000228886	---	---	---	2.98383	1.48007	2.01601	0.251569	No	387891
ENSG00000257052	---	---	---	1.84545	0.917194	2.01206	0.348789	No	1030789
ENSG00000271811	---	---	---	9.92735	3.78	2.62628	0.0278674	Yes	708064
ENSG00000168286	57215	THAP11	THAP domain containing 11	1638.53	1680.01	-1.02531	0.513076	No	3127549
ENSG00000067900	6093	ROCK1	Rho associated coiled-coil containing protein kinase 1	8206.95	8414.58	-1.0253	0.361272	No	23121
ENSG00000240476	105374003	LOC105374003	uncharacterized LOC105374003	1502.72	1540.64	-1.02524	0.493167	No	507532
ENSG00000099937	3053	SERPIND1	serpin family D member 1	22.4292	22.9942	-1.02519	0.923238	No	374073
ENSG00000170365	4086	SMAD1	SMAD family member 1	794.607	814.586	-1.02514	0.578742	No	56650
ENSG00000188987	---	---	---	7.65156	2.91885	2.62143	0.0445574	Yes	518189
ENSG00000259845	---	---	---	7.06362	3.51804	2.00783	0.142534	No	2005711
ENSG00000158482	---	---	---	5.13066	2.56045	2.00381	0.148437	No	690357
ENSG00000183340	8690	JRKL	JRK like	1244.41	1275.67	-1.02512	0.540071	No	1040257
ENSG00000272597	---	---	---	1.83606	0.917194	2.00183	0.413819	No	281183
ENSG00000237525	---	---	---	6.18115	3.09098	1.99974	0.261394	No	288075
ENSG00000123297	10102	TSFM	Ts translation elongation factor, mitochondrial	1254.99	1286.47	-1.02508	0.536379	No	187383
ENSG00000163866	113444	SMIM12	small integral membrane protein 12	2064.19	2115.61	-1.02491	0.406275	No	557568
ENSG00000273237	---	---	---	20.3717	7.82175	2.60449	0.00210873	Yes	1003500
ENSG00000269988	---	---	---	16.18	8.09495	1.99877	0.0144719	No	1372605
ENSG00000139160	254013	ETFBKMT	electron transfer flavoprotein subunit beta lysine methyltransferase	156.88	160.783	-1.02488	0.816243	No	109325
ENSG00000013503	55703	POLR3B	RNA polymerase III subunit B	1549.32	1587.81	-1.02484	0.481906	No	1584934
ENSG00000226221	441073	RPL26P19	ribosomal protein L26 pseudogene 19	590.066	604.683	-1.02477	0.660034	No	518249
ENSG00000236056	---	---	---	1.85526	0.928311	1.99854	0.337773	No	2996483
ENSG00000173598	11163	NUDT4	nudix hydrolase 4	7113.46	7289.45	-1.02474	0.316242	No	1844123
ENSG00000198730	9646	CTR9	CTR9 homolog, Paf1/RNA polymerase II complex component	5266.79	5397.08	-1.02474	0.301806	No	116120
ENSG00000243304	---	---	---	1.98761	0.995177	1.99724	0.404502	No	3087209
ENSG00000104983	729440	CCDC61	coiled-coil domain containing 61	453.114	464.314	-1.02472	0.676531	No	51115
ENSG00000118307	55259	DNAI7	dynein axonemal intermediate chain 7	7.44052	7.62406	-1.02467	0.955668	No	2810157
ENSG00000175730	---	---	---	250.341	125.502	1.99472	1.5695e-08	No	2510070
ENSG00000258768	---	---	---	133.068	51.4055	2.5886	8.28657e-08	Yes	255076
ENSG00000261468	---	---	---	38.0609	14.7251	2.58476	0.000109743	Yes	1556484
ENSG00000174680	---	---	---	2.49328	1.25023	1.99425	0.337889	No	2470631
ENSG00000228384	---	---	---	2.23151	1.12003	1.99235	0.324496	No	1054471
ENSG00000181638	286128	ZFP41	ZFP41 zinc finger protein	668.228	684.66	-1.02459	0.61248	No	209248
ENSG00000268565	---	---	---	12.7293	4.93512	2.57933	0.00862599	Yes	41796
ENSG00000231632	---	---	---	882.385	443.094	1.99142	7.59305e-11	No	152185
ENSG00000258088	---	---	---	35.1067	17.6366	1.99056	0.00693972	No	177186
ENSG00000234492	285456	RPL34-DT	RPL34 divergent transcript	9.32474	9.55345	-1.02453	0.948703	No	482294
ENSG00000099795	4713	NDUFB7	NADH:ubiquinone oxidoreductase subunit B7	2632.01	2696.19	-1.02439	0.427379	No	478408
ENSG00000267571	---	---	---	1.90828	0.959649	1.98852	0.329298	No	657210
ENSG00000228124	---	---	---	16.1769	6.28898	2.57225	0.00788857	Yes	695157
ENSG00000170903	84437	MSANTD4	Myb/SANT DNA binding domain containing 4 with coiled-coils	2392.39	2450.56	-1.02431	0.485975	No	1671357
ENSG00000259182	---	---	---	2.25715	1.13802	1.9834	0.336452	No	120856
ENSG00000226801	---	---	---	2.00505	1.01243	1.98043	0.337733	No	1234391
ENSG00000233438	---	---	---	1.61499	0.815476	1.98043	0.434772	No	212364
ENSG00000273073	---	---	---	5.6644	2.86296	1.97851	0.294686	No	441372
ENSG00000228791	---	---	---	4.39016	2.2208	1.97684	0.282741	No	29330
ENSG00000159263	6493	SIM2	SIM bHLH transcription factor 2	2486.83	2547	-1.0242	0.477133	No	267817
ENSG00000131269	22	ABCB7	ATP binding cassette subfamily B member 7	1114.81	1141.73	-1.02414	0.541261	No	639705
ENSG00000223356	---	---	---	5.67967	2.87946	1.97248	0.168316	No	1525215
ENSG00000272911	---	---	---	9.43298	3.67842	2.56441	0.0375713	Yes	457060
ENSG00000258879	---	---	---	1.99101	1.00968	1.97192	0.364869	No	2626411
ENSG00000185716	730094	MOSMO	modulator of smoothened	1263.38	1293.85	-1.02412	0.505197	No	330015
ENSG00000270681	---	---	---	30.9987	15.759	1.96704	0.0139696	No	250867
ENSG00000237877	---	---	---	14.4834	5.65652	2.56049	0.00892703	Yes	331413
ENSG00000264324	---	---	---	14.3635	7.30769	1.96553	0.0229977	No	1553805
ENSG00000115268	6209	RPS15	ribosomal protein S15	16356.1	16750	-1.02408	0.284471	No	1690056
ENSG00000108669	9267	CYTH1	cytohesin 1	1429.45	1463.8	-1.02403	0.487155	No	1048995
ENSG00000204463	7917	BAG6	BAG cochaperone 6	13688.5	14016.1	-1.02393	0.248824	No	628851
ENSG00000026559	3755	KCNG1	potassium voltage-gated channel modifier subfamily G member 1	51.2962	52.5213	-1.02388	0.891396	No	2555497
ENSG00000242737	---	---	---	3.39606	1.73145	1.96139	0.295976	No	954284
ENSG00000178761	57184	FAM219B	family with sequence similarity 219 member B	3059.34	3132.17	-1.02381	0.398494	No	178432
ENSG00000250762	---	---	---	3.89114	1.98601	1.95928	0.351081	No	726184
ENSG00000250853	---	---	---	2.42998	1.24038	1.95906	0.345505	No	345955
ENSG00000260013	---	---	---	1.72295	0.879487	1.95904	0.396425	No	1236317
ENSG00000226645	---	---	---	2.30891	1.17958	1.9574	0.341093	No	2470954
ENSG00000125863	8195	MKKS	MKKS centrosomal shuttling protein	2802.82	2869.3	-1.02372	0.390821	No	1580113
ENSG00000200087	26768	SNORA73B	small nucleolar RNA, H/ACA box 73B	46.624	47.7272	-1.02366	0.904022	No	4608
ENSG00000267539	---	---	---	2.89566	1.48007	1.95644	0.315013	No	237197
ENSG00000237683	---	---	---	3.01848	1.54304	1.95619	0.30493	No	2155779
ENSG00000269423	---	---	---	9.95227	5.0909	1.95491	0.125749	No	802936
ENSG00000203276	---	---	---	9.5026	4.86334	1.95393	0.0877882	No	425549
ENSG00000271927	---	---	---	19.3888	9.92646	1.95325	0.0736456	No	662725
ENSG00000261670	---	---	---	1.79044	0.917194	1.95209	0.430246	No	3353295
ENSG00000230092	---	---	---	27.1735	13.9234	1.95164	0.0197943	No	1549617
ENSG00000261315	---	---	---	16.1568	6.35783	2.54124	0.0058562	Yes	3194022
ENSG00000163539	23122	CLASP2	cytoplasmic linker associated protein 2	3334.55	3413.42	-1.02365	0.395444	No	194669
ENSG00000204780	---	---	---	1.79311	0.918809	1.95156	0.397239	No	433045
ENSG00000139746	64062	RBM26	RNA binding motif protein 26	5540.26	5671.14	-1.02362	0.332046	No	290973
ENSG00000252139	---	---	---	3.36178	1.72479	1.94909	0.247991	No	554359
ENSG00000261159	---	---	---	6.15991	3.16262	1.94773	0.178734	No	121758
ENSG00000243495	---	---	---	2.8667	1.47268	1.94659	0.268996	No	119481
ENSG00000217702	---	---	---	1.93527	0.994984	1.94503	0.381771	No	1324901
ENSG00000226798	---	---	---	8.46504	4.35347	1.94444	0.0852575	No	1700407
ENSG00000081014	23431	AP4E1	adaptor related protein complex 4 subunit epsilon 1	2915.83	2984.46	-1.02354	0.434205	No	512350
ENSG00000259238	---	---	---	8.40431	4.3276	1.94203	0.15606	No	748890
ENSG00000186814	100101467	ZSCAN30	zinc finger and SCAN domain containing 30	1324.76	1355.82	-1.02344	0.511471	No	26159
ENSG00000172663	80194	TMEM134	transmembrane protein 134	782.675	801.011	-1.02343	0.606681	No	356927
ENSG00000164114	79884	MAP9	microtubule associated protein 9	4118.15	4214.43	-1.02338	0.446186	No	917602
ENSG00000173517	79834	PEAK1	pseudopodium enriched atypical kinase 1	5242.09	5364.51	-1.02335	0.48347	No	107940
ENSG00000103510	84148	KAT8	lysine acetyltransferase 8	1444.91	1478.59	-1.0233	0.486061	No	684936
ENSG00000109390	4717	NDUFC1	NADH:ubiquinone oxidoreductase subunit C1	2043.31	2090.59	-1.02314	0.485871	No	135005
ENSG00000135452	6302	TSPAN31	tetraspanin 31	615.324	629.533	-1.02309	0.683317	No	231959
ENSG00000232274	---	---	---	5.66983	2.92023	1.94157	0.202418	No	2225830
ENSG00000249258	---	---	---	7.79249	4.0137	1.94147	0.151677	No	471455
ENSG00000232454	---	---	---	3.5064	1.80875	1.93858	0.337425	No	361143
ENSG00000171735	23261	CAMTA1	calmodulin binding transcription activator 1	1152.31	1178.91	-1.02308	0.589538	No	3609010
ENSG00000107404	1855	DVL1	dishevelled segment polarity protein 1	10699.3	10946.3	-1.02308	0.312557	No	1010428
ENSG00000266897	---	---	---	7.9437	4.10264	1.93624	0.128788	No	961470
ENSG00000256799	---	---	---	2.28348	1.17958	1.93584	0.350079	No	269971
ENSG00000270408	---	---	---	2.82572	1.46252	1.93208	0.373624	No	1792257
ENSG00000139915	161357	MDGA2	MAM domain containing glycosylphosphatidylinositol anchor 2	205.273	209.979	-1.02293	0.807891	No	513944
ENSG00000217643	---	---	---	6.55623	3.39427	1.93156	0.128208	No	9805
ENSG00000254400	---	---	---	21.8525	11.3152	1.93125	0.0120481	No	384602
ENSG00000238541	---	---	---	1.87645	0.972877	1.92876	0.454868	No	527560
ENSG00000258896	---	---	---	6.32389	3.27911	1.92854	0.167754	No	265915
ENSG00000254577	---	---	---	14.6814	5.85577	2.50717	0.0210206	Yes	470759
ENSG00000118680	103910	MYL12B	myosin light chain 12B	22125.5	22631.3	-1.02286	0.271324	No	3052673
ENSG00000225113	---	---	---	15.7601	6.29295	2.50441	0.00820265	Yes	1104729
ENSG00000269938	---	---	---	20.5063	10.6355	1.9281	0.0500694	No	503971
ENSG00000267988	---	---	---	2.12513	1.10365	1.92555	0.360696	No	531148
ENSG00000160439	112724	RDH13	retinol dehydrogenase 13	548.564	561.094	-1.02284	0.686244	No	2999563
ENSG00000236255	---	---	---	60.4287	31.4055	1.92415	0.000230906	No	1013593
ENSG00000157193	7804	LRP8	LDL receptor related protein 8	1631.07	1668.32	-1.02283	0.543712	No	280828
ENSG00000259257	---	---	---	1.96049	1.01953	1.92294	0.363947	No	24645
ENSG00000270050	---	---	---	2.84924	1.48225	1.92224	0.310122	No	520672
ENSG00000158417	9669	EIF5B	eukaryotic translation initiation factor 5B	13572.4	13881.8	-1.02279	0.362335	No	642975
ENSG00000248503	---	---	---	19.9346	7.9837	2.49691	0.00963195	Yes	343101
ENSG00000188725	643155	SMIM15	small integral membrane protein 15	4126.69	4220.58	-1.02275	0.421792	No	599336
ENSG00000243155	---	---	---	39.7435	20.6918	1.92074	0.00319837	No	105398
ENSG00000267350	---	---	---	1578.91	822.149	1.92047	3.44826e-13	No	363374
ENSG00000268193	---	---	---	2.98098	1.55576	1.91609	0.327397	No	106754
ENSG00000129151	8424	BBOX1	gamma-butyrobetaine hydroxylase 1	4.60424	4.70887	-1.02273	0.972318	No	749094
ENSG00000260936	---	---	---	20.4464	10.6763	1.91512	0.0322308	No	981392
ENSG00000260824	---	---	---	15.3811	6.17502	2.49086	0.00745226	Yes	185560
ENSG00000007384	64285	RHBDF1	rhomboid 5 homolog 1	2829.9	2894.19	-1.02272	0.4592	No	243254
ENSG00000230940	---	---	---	1.5001	0.784108	1.91312	0.451426	No	605026
ENSG00000102753	3839	KPNA3	karyopherin subunit alpha 3	8394.39	8584.1	-1.0226	0.35336	No	60602
ENSG00000131236	10487	CAP1	cyclase associated actin cytoskeleton regulatory protein 1	43196.1	44168.6	-1.02251	0.263465	No	2818493
ENSG00000106635	9275	BCL7B	BAF chromatin remodeling complex subunit BCL7B	2677.64	2737.86	-1.02249	0.451936	No	381503
ENSG00000236842	---	---	---	1.68065	0.879487	1.91094	0.403834	No	125449
ENSG00000104047	56986	DTWD1	DTW domain containing 1	1107.09	1131.97	-1.02248	0.574508	No	1800042
ENSG00000270792	---	---	---	3.03946	1.59063	1.91085	0.289653	No	1818820
ENSG00000077713	203427	SLC25A43	solute carrier family 25 member 43	1128.27	1153.62	-1.02247	0.577904	No	2042278
ENSG00000176248	29882	ANAPC2	anaphase promoting complex subunit 2	3161.3	3231.73	-1.02228	0.420651	No	1027415
ENSG00000094880	8697	CDC23	cell division cycle 23	2834.91	2897.84	-1.0222	0.466932	No	1763265
ENSG00000240005	---	---	---	6.22025	3.25659	1.91005	0.197395	No	1628150
ENSG00000226055	---	---	---	2.02708	1.06199	1.90876	0.394481	No	403215
ENSG00000260534	---	---	---	146.813	76.9336	1.90831	6.31111e-06	No	176983
ENSG00000207231	---	---	---	1.73978	0.912827	1.90593	0.404245	No	225707
ENSG00000261430	---	---	---	1.37321	0.721921	1.90216	0.459955	No	143060
ENSG00000261582	---	---	---	6.40588	3.36901	1.90141	0.14051	No	78244
ENSG00000042753	1175	AP2S1	adaptor related protein complex 2 subunit sigma 1	10385.7	10615.7	-1.02215	0.36066	No	804228
ENSG00000258479	---	---	---	6.77635	3.56575	1.9004	0.134714	No	509570
ENSG00000131652	79228	THOC6	THO complex subunit 6	866.722	885.739	-1.02194	0.67531	No	112452
ENSG00000258472	---	---	---	5.77631	3.04171	1.89903	0.244811	No	1184298
ENSG00000238329	---	---	---	2.70959	1.42899	1.89615	0.350553	No	44820
ENSG00000260773	---	---	---	3.1487	1.66129	1.89533	0.308122	No	519258
ENSG00000127990	8910	SGCE	sarcoglycan epsilon	3566.55	3644.77	-1.02193	0.413144	No	1950986
ENSG00000111727	29915	HCFC2	host cell factor C2	1553.43	1587.4	-1.02187	0.531992	No	223642
ENSG00000256361	---	---	---	2.03863	1.0759	1.89482	0.401117	No	891886
ENSG00000259762	---	---	---	1.81657	0.959649	1.89295	0.377943	No	93368
ENSG00000241847	---	---	---	3.9945	2.11241	1.89097	0.201167	No	359132
ENSG00000268047	---	---	---	3.72484	1.97148	1.88936	0.300985	No	557246
ENSG00000064490	8625	RFXANK	regulatory factor X associated ankyrin containing protein	1859.75	1900.3	-1.0218	0.600949	No	41845
ENSG00000146247	55023	PHIP	pleckstrin homology domain interacting protein	4615.99	4716.28	-1.02173	0.623614	No	270393
ENSG00000271662	---	---	---	8.41221	4.4598	1.88623	0.175048	No	388163
ENSG00000234353	---	---	---	2.02143	1.07174	1.88611	0.33468	No	211681
ENSG00000228643	---	---	---	2.2819	1.21004	1.88581	0.348123	No	8061254
ENSG00000251442	---	---	---	74.3447	39.4336	1.88531	0.00057294	No	537823
ENSG00000268520	---	---	---	6.39645	3.39427	1.88448	0.15459	No	158494
ENSG00000140675	6524	SLC5A2	solute carrier family 5 member 2	3.77263	3.85455	-1.02171	0.967747	No	421517
ENSG00000270095	---	---	---	6.07577	3.22677	1.88292	0.28251	No	500836
ENSG00000258354	---	---	---	4.21649	2.23964	1.88266	0.260497	No	773199
ENSG00000112308	81688	C6orf62	chromosome 6 open reading frame 62	14413.3	14723.4	-1.02152	0.361478	No	439218
ENSG00000231795	---	---	---	2.07718	1.10365	1.8821	0.368338	No	750150
ENSG00000226268	---	---	---	63.8148	26.0478	2.44991	0.00234859	Yes	831103
ENSG00000248583	---	---	---	2.19794	1.16832	1.88128	0.399083	No	3556844
ENSG00000232611	---	---	---	88.4843	47.1452	1.87685	4.89414e-05	No	818826
ENSG00000171863	6201	RPS7	ribosomal protein S7	22622.5	23108.3	-1.02148	0.307857	No	4724878
ENSG00000116489	829	CAPZA1	capping actin protein of muscle Z-line subunit alpha 1	19150.6	19560.9	-1.02143	0.2917	No	1619147
ENSG00000258346	---	---	---	2.21298	1.17912	1.87681	0.422475	No	94340
ENSG00000158560	1780	DYNC1I1	dynein cytoplasmic 1 intermediate chain 1	56.2346	57.4378	-1.0214	0.913085	No	2735003
ENSG00000117289	---	---	---	9982.41	4081.56	2.44573	1.81641e-14	Yes	1023
ENSG00000260955	---	---	---	3.32249	1.77056	1.87652	0.369818	No	404734
ENSG00000260671	---	---	---	9.04147	3.69844	2.44467	0.0480348	Yes	1414380
ENSG00000224745	---	---	---	17.4414	7.13552	2.4443	0.0110151	Yes	517828
ENSG00000224818	---	---	---	215.238	114.782	1.87519	6.87133e-07	No	664276
ENSG00000198598	4326	MMP17	matrix metallopeptidase 17	244.379	249.596	-1.02135	0.791294	No	37020
ENSG00000258210	---	---	---	22.5903	12.0481	1.87501	0.02208	No	469816
ENSG00000113812	93973	ACTR8	actin related protein 8	2993.54	3057.12	-1.02124	0.45837	No	515869
ENSG00000212163	---	---	---	1.73978	0.928311	1.87414	0.410255	No	815164
ENSG00000128185	85359	DGCR6L	DiGeorge syndrome critical region gene 6 like	1863.17	1902.62	-1.02117	0.636522	No	445881
ENSG00000237200	---	---	---	6.2835	3.35305	1.87397	0.278722	No	3242062
ENSG00000267316	---	---	---	5.38717	2.87495	1.87383	0.215324	No	11351153
ENSG00000199471	---	---	---	2.6983	1.44008	1.87372	0.306872	No	1051459
ENSG00000272696	---	---	---	20.4831	10.9364	1.87293	0.0183407	No	1579618
ENSG00000234851	647099	RPL23AP42	ribosomal protein L23a pseudogene 42	4866.84	4969.84	-1.02116	0.581723	No	254423
ENSG00000270673	101410533	YTHDF3-DT	YTHDF3 divergent transcript	21.456	21.9075	-1.02104	0.933773	No	1945100
ENSG00000236058	729340	RPL17P36	ribosomal protein L17 pseudogene 36	218.704	223.306	-1.02104	0.786296	No	1431543
ENSG00000269998	---	---	---	27.4445	14.671	1.87067	0.0123698	No	1270786
ENSG00000066379	30834	POLR1H	RNA polymerase I subunit H	445.445	454.808	-1.02102	0.748168	No	400218
ENSG00000126003	5326	PLAGL2	PLAG1 like zinc finger 2	1791.51	1829.09	-1.02098	0.589003	No	2993292
ENSG00000229729	---	---	---	577.528	309.586	1.86549	8.16683e-11	No	1593067
ENSG00000250444	402226	CCT5P1	chaperonin containing TCP1 subunit 5 pseudogene 1	36.7644	37.5353	-1.02097	0.913419	No	3333823
ENSG00000203780	92565	FANK1	fibronectin type III and ankyrin repeat domains 1	139.358	142.279	-1.02096	0.84307	No	407735
ENSG00000116793	10745	PHTF1	putative homeodomain transcription factor 1	4297.65	4387.66	-1.02095	0.432716	No	719984
ENSG00000230024	---	---	---	4.77736	2.56437	1.86298	0.222501	No	485953
ENSG00000236257	---	---	---	16.7466	8.99097	1.86261	0.0285575	No	215295
ENSG00000105197	92609	TIMM50	translocase of inner mitochondrial membrane 50	3316.58	3386.04	-1.02094	0.497386	No	576544
ENSG00000142528	25888	ZNF473	zinc finger protein 473	887.392	905.976	-1.02094	0.60843	No	386498
ENSG00000232295	---	---	---	30.2598	12.4827	2.42415	0.00237303	Yes	455469
ENSG00000081177	55218	EXD2	exonuclease 3'-5' domain containing 2	805.82	822.629	-1.02086	0.669323	No	183536
ENSG00000125648	79085	SLC25A23	solute carrier family 25 member 23	5010.84	5115.34	-1.02085	0.44917	No	105906
ENSG00000198169	90987	ZNF251	zinc finger protein 251	1408.71	1438.04	-1.02082	0.66175	No	1148726
ENSG00000108797	8506	CNTNAP1	contactin associated protein 1	4454.66	4546.56	-1.02063	0.455998	No	1707939
ENSG00000145494	4726	NDUFS6	NADH:ubiquinone oxidoreductase subunit S6	3123.63	3187.74	-1.02052	0.515124	No	565182
ENSG00000118181	6230	RPS25	ribosomal protein S25	21298.3	21734.5	-1.02048	0.496731	No	1139516
ENSG00000119632	83982	IFI27L2	interferon alpha inducible protein 27 like 2	2108.48	2151.64	-1.02047	0.560507	No	424149
ENSG00000203616	---	---	---	19.9789	10.7431	1.85969	0.0200847	No	2016192
ENSG00000124224	---	---	---	763.76	411.28	1.85703	5.33459e-10	No	34647
ENSG00000204267	6891	TAP2	transporter 2, ATP binding cassette subfamily B member	1885.73	1924.26	-1.02043	0.689032	No	556826
ENSG00000224936	---	---	---	4.63264	2.49521	1.85662	0.223439	No	9426
ENSG00000188223	---	---	---	8.36291	4.50814	1.85507	0.147752	No	1762445
ENSG00000213585	7416	VDAC1	voltage dependent anion channel 1	16219.6	16551	-1.02043	0.324671	No	41145
ENSG00000137040	26953	RANBP6	RAN binding protein 6	3368.99	3437.61	-1.02037	0.47171	No	369481
ENSG00000177725	---	---	---	6.09718	3.28678	1.85506	0.199882	No	888598
ENSG00000235072	---	---	---	2.65729	1.43402	1.85304	0.404245	No	456430
ENSG00000272325	11165	NUDT3	nudix hydrolase 3	4465.18	4555.87	-1.02031	0.516454	No	712342
ENSG00000272512	---	---	---	135.476	56.225	2.40954	1.29994e-06	Yes	1361727
ENSG00000204169	---	---	---	58.4138	31.5274	1.8528	0.0012335	No	390113
ENSG00000187229	---	---	---	29.2825	15.8207	1.8509	0.00545464	No	1117775
ENSG00000261690	---	---	---	26.5566	14.3537	1.85017	0.00671516	No	608612
ENSG00000268083	---	---	---	1.45069	0.784108	1.85011	0.480683	No	61341
ENSG00000119421	4702	NDUFA8	NADH:ubiquinone oxidoreductase subunit A8	2359.17	2406.93	-1.02024	0.571091	No	117502
ENSG00000075975	23609	MKRN2	makorin ring finger protein 2	2946.5	3006.1	-1.02023	0.468363	No	1917942
ENSG00000272459	---	---	---	11.9349	6.45528	1.84886	0.0614304	No	797664
ENSG00000270917	---	---	---	8.71898	3.62775	2.40341	0.0442075	Yes	1464477
ENSG00000223382	105378622	LINC01778	long intergenic non-protein coding RNA 1778	33.9684	34.6527	-1.02015	0.931905	No	238723
ENSG00000225726	---	---	---	2.35401	1.2747	1.84671	0.355597	No	353074
ENSG00000223390	---	---	---	11.884	4.94655	2.40249	0.0358072	Yes	282220
ENSG00000111615	11103	KRR1	KRR1 small subunit processome component homolog	3569.62	3640.76	-1.01993	0.517207	No	9493
ENSG00000065989	5141	PDE4A	phosphodiesterase 4A	66.5006	67.8256	-1.01992	0.894859	No	1335643
ENSG00000238621	---	---	---	1.96049	1.06199	1.84605	0.40804	No	279953
ENSG00000172500	9158	FIBP	FGF1 intracellular binding protein	3922.26	4000.14	-1.01986	0.448961	No	1937660
ENSG00000268199	---	---	---	2.12305	1.15009	1.84598	0.41055	No	385529
ENSG00000260174	---	---	---	20.7641	11.2589	1.84425	0.0439646	No	2776527
ENSG00000269304	---	---	---	19.9192	10.8091	1.84281	0.0305327	No	5755050
ENSG00000232815	---	---	---	12.4069	6.74249	1.8401	0.126048	No	1296428
ENSG00000218676	---	---	---	3.67058	1.99497	1.83991	0.367671	No	155416
ENSG00000268713	---	---	---	64.1256	34.8595	1.83954	0.000645054	No	5189627
ENSG00000262519	---	---	---	321.67	174.937	1.83878	4.1272e-08	No	543310
ENSG00000258399	---	---	---	310.472	168.915	1.83804	7.07945e-07	No	1505992
ENSG00000260698	---	---	---	26.7069	11.1501	2.39522	0.00291415	Yes	290838
ENSG00000175854	375757	SWI5	SWI5 homologous recombination repair protein	977.322	996.709	-1.01984	0.667779	No	1538660
ENSG00000272137	---	---	---	3.76149	2.04701	1.83755	0.289055	No	63289
ENSG00000158806	10361	NPM2	nucleophosmin/nucleoplasmin 2	26.2228	26.742	-1.0198	0.939868	No	1033813
ENSG00000232472	644820	EEF1B2P3	eukaryotic translation elongation factor 1 beta 2 pseudogene 3	737.776	752.372	-1.01978	0.697929	No	1548230
ENSG00000273275	---	---	---	23.6375	12.8637	1.83754	0.0260996	No	59359
ENSG00000203722	353091	RAET1G	retinoic acid early transcript 1G	70.3317	71.7213	-1.01976	0.919369	No	3262
ENSG00000174749	132720	FAM241A	family with sequence similarity 241 member A	451.84	460.755	-1.01973	0.729958	No	328632
ENSG00000257390	---	---	---	22.8266	12.4227	1.83748	0.0153098	No	564754
ENSG00000241520	---	---	---	3.34594	1.82631	1.83208	0.34356	No	157117
ENSG00000144785	---	---	---	22.5295	9.44663	2.38493	0.00462538	Yes	76241
ENSG00000258944	---	---	---	16.8765	7.07767	2.38448	0.00930542	Yes	513080
ENSG00000269028	---	---	---	475.788	259.823	1.8312	7.12069e-10	No	599084
ENSG00000198237	---	---	---	2.18467	1.1934	1.83063	0.483335	No	3170335
ENSG00000178429	439992	RPS3AP5	RPS3A pseudogene 5	408.117	416.137	-1.01965	0.780692	No	64301
ENSG00000244699	---	---	---	1.70696	0.933751	1.82807	0.440372	No	937039
ENSG00000273017	---	---	---	17.9994	7.55752	2.38166	0.00930818	Yes	2859802
ENSG00000131779	8799	PEX11B	peroxisomal biogenesis factor 11 beta	1797.95	1833.12	-1.01956	0.55235	No	78806
ENSG00000254485	---	---	---	9.58063	4.02419	2.38076	0.0378842	Yes	201899
ENSG00000266803	---	---	---	2.25195	1.23286	1.82661	0.407906	No	800580
ENSG00000185607	---	---	---	9.85295	5.39843	1.82515	0.0932806	No	480327
ENSG00000198518	---	---	---	33.93	18.5988	1.82431	0.00749729	No	502634
ENSG00000164576	79685	SAP30L	SAP30 like	2473.83	2522.09	-1.01951	0.550191	No	22292
ENSG00000162426	50651	SLC45A1	solute carrier family 45 member 1	103.188	105.198	-1.01948	0.878322	No	2076508
ENSG00000267138	---	---	---	7.6535	4.19872	1.82282	0.15267	No	5671
ENSG00000197062	7741	ZSCAN26	zinc finger and SCAN domain containing 26	1016.26	1035.91	-1.01934	0.637807	No	162312
ENSG00000233588	---	---	---	107.606	59.0641	1.82184	2.5878e-05	No	107103
ENSG00000120992	10434	LYPLA1	lysophospholipase 1	5282.58	5384.02	-1.0192	0.459457	No	461122
ENSG00000152422	7518	XRCC4	X-ray repair cross complementing 4	835.135	851.097	-1.01911	0.671223	No	15302
ENSG00000269463	---	---	---	2.32104	1.2747	1.82084	0.421773	No	137398
ENSG00000223695	---	---	---	3.36016	1.84697	1.81928	0.278808	No	797893
ENSG00000215179	---	---	---	3.56861	1.9638	1.81719	0.331071	No	1046390
ENSG00000267198	---	---	---	3.65324	2.01169	1.816	0.35476	No	19718
ENSG00000196966	---	---	---	95.2893	52.4893	1.81541	0.000181851	No	482109
ENSG00000230648	---	---	---	5.34813	2.94928	1.81337	0.343111	No	129906
ENSG00000167280	64772	ENGASE	endo-beta-N-acetylglucosaminidase	1069.73	1090.14	-1.01907	0.678257	No	1135070
ENSG00000166530	---	---	---	5.34105	2.94603	1.81296	0.215841	No	159913
ENSG00000224870	148413	MRPL20-AS1	MRPL20 antisense RNA 1	1218.52	1241.6	-1.01894	0.645355	No	960255
ENSG00000262837	---	---	---	5.27228	2.91256	1.81019	0.22243	No	2581844
ENSG00000251571	---	---	---	3.9197	2.16803	1.80795	0.246331	No	415879
ENSG00000159592	60313	GPBP1L1	GC-rich promoter binding protein 1 like 1	4769.17	4859.3	-1.0189	0.491529	No	548732
ENSG00000256262	---	---	---	25.751	10.9218	2.35775	0.00102091	Yes	921436
ENSG00000138814	5530	PPP3CA	protein phosphatase 3 catalytic subunit alpha	5365.87	5466.96	-1.01884	0.441643	No	529732
ENSG00000232527	100996732	LINC02802	long intergenic non-protein coding RNA 2802	218.038	222.14	-1.01881	0.835656	No	7873
ENSG00000255723	---	---	---	1.66059	0.918809	1.80732	0.454448	No	933062
ENSG00000152726	---	---	---	1204.47	511.549	2.35456	2.10615e-13	Yes	925857
ENSG00000236816	---	---	---	58.889	25.0131	2.35433	0.000526553	Yes	1879510
ENSG00000146574	221960	CCZ1B	CCZ1 homolog B, vacuolar protein trafficking and biogenesis associated	581.266	592.186	-1.01879	0.898963	No	2536470
ENSG00000111058	79611	ACSS3	acyl-CoA synthetase short chain family member 3	599.739	611.002	-1.01878	0.721196	No	1199429
ENSG00000156253	10069	RWDD2B	RWD domain containing 2B	1850.06	1884.59	-1.01866	0.55628	No	3198265
ENSG00000116171	6342	SCP2	sterol carrier protein 2	6347.07	6465.03	-1.01858	0.448015	No	391980
ENSG00000111371	81539	SLC38A1	solute carrier family 38 member 1	18990.4	19341.4	-1.01849	0.484397	No	21537
ENSG00000187824	388335	TMEM220	transmembrane protein 220	2.14072	2.17994	-1.01832	0.980238	No	1112111
ENSG00000215388	---	---	---	12.3662	6.84263	1.80723	0.0820379	No	100801
ENSG00000167323	6786	STIM1	stromal interaction molecule 1	3486.57	3550.32	-1.01829	0.52187	No	1624460
ENSG00000264268	100616467	MIR4767	microRNA 4767	17.3202	17.6321	-1.01801	0.953052	No	828093
ENSG00000232450	100270827	RPS2P14	ribosomal protein S2 pseudogene 14	29.2902	29.8172	-1.01799	0.943066	No	779842
ENSG00000167969	1632	ECI1	enoyl-CoA delta isomerase 1	1045.11	1063.78	-1.01786	0.740726	No	429472
ENSG00000226608	---	---	---	1448.31	617.227	2.34647	5.01755e-13	Yes	1086740
ENSG00000251342	---	---	---	1.9183	1.06199	1.80632	0.459088	No	778244
ENSG00000038358	23644	EDC4	enhancer of mRNA decapping 4	4256.71	4332.58	-1.01782	0.562019	No	3096836
ENSG00000259967	---	---	---	2.22693	1.23286	1.80632	0.403748	No	719798
ENSG00000213194	---	---	---	5.44864	3.0177	1.80556	0.290488	No	403291
ENSG00000198089	9814	SFI1	SFI1 centrin binding protein	1908.33	1942.29	-1.01779	0.603548	No	730813
ENSG00000271853	---	---	---	4.64913	2.5754	1.80521	0.259094	No	3604072
ENSG00000112874	83594	NUDT12	nudix hydrolase 12	1094.45	1113.91	-1.01777	0.633354	No	4810663
ENSG00000198952	23381	SMG5	SMG5 nonsense mediated mRNA decay factor	9956.74	10132.3	-1.01764	0.419128	No	1955561
ENSG00000227118	---	---	---	8.05975	4.46671	1.80441	0.15409	No	478323
ENSG00000104814	11184	MAP4K1	mitogen-activated protein kinase kinase kinase kinase 1	2.79513	2.84436	-1.01761	0.979861	No	282637
ENSG00000228313	---	---	---	6.05237	3.35693	1.80295	0.235359	No	668960
ENSG00000054118	9967	THRAP3	thyroid hormone receptor associated protein 3	15250.8	15519.2	-1.0176	0.472318	No	996879
ENSG00000136205	64759	TNS3	tensin 3	22059.7	22447.4	-1.01757	0.487759	No	310748
ENSG00000110429	26273	FBXO3	F-box protein 3	2082.39	2118.94	-1.01755	0.619309	No	20387
ENSG00000272373	---	---	---	29.1266	16.1676	1.80154	0.0273301	No	5685865
ENSG00000266044	---	---	---	1.34715	0.748072	1.80083	0.510071	No	55579
ENSG00000182993	144608	C12orf60	chromosome 12 open reading frame 60	88.4367	89.9869	-1.01753	0.903712	No	330250
ENSG00000225462	343332	FDPSP1	farnesyl diphosphate synthase pseudogene 1	6.39142	6.50339	-1.01752	0.971552	No	36435
ENSG00000101126	23394	ADNP	activity dependent neuroprotector homeobox	7275.41	7402.31	-1.01744	0.49234	No	2647205
ENSG00000269946	---	---	---	12.4679	6.92498	1.80042	0.0871433	No	379677
ENSG00000254615	---	---	---	500.189	277.885	1.79998	8.42737e-10	No	6159050
ENSG00000162688	178	AGL	amylo-alpha-1, 6-glucosidase, 4-alpha-glucanotransferase	1965.08	1999.26	-1.01739	0.647401	No	236207
ENSG00000139154	121536	AEBP2	AE binding protein 2	2420.31	2462.39	-1.01738	0.618987	No	75661
ENSG00000178234	63917	GALNT11	polypeptide N-acetylgalactosaminyltransferase 11	2054.13	2089.67	-1.0173	0.568211	No	20880
ENSG00000161048	222236	NAPEPLD	N-acyl phosphatidylethanolamine phospholipase D	1976.51	2010.7	-1.0173	0.60984	No	673482
ENSG00000259494	26589	MRPL46	mitochondrial ribosomal protein L46	610.849	621.379	-1.01724	0.748459	No	130119
ENSG00000250734	---	---	---	1.58236	0.879487	1.79919	0.45768	No	1583095
ENSG00000158161	2140	EYA3	EYA transcriptional coactivator and phosphatase 3	2169.16	2206.5	-1.01721	0.607229	No	366006
ENSG00000230551	---	---	---	1064.9	592.13	1.79843	9.20589e-11	No	2574016
ENSG00000270953	---	---	---	35.5988	15.3355	2.32133	0.000892555	Yes	1183021
ENSG00000268166	---	---	---	7.69047	4.28129	1.7963	0.261272	No	21304
ENSG00000111358	2967	GTF2H3	general transcription factor IIH subunit 3	2555.33	2599.07	-1.01712	0.622593	No	838721
ENSG00000000938	2268	FGR	FGR proto-oncogene, Src family tyrosine kinase	1.3262	1.34889	-1.01711	0.985221	No	819425
ENSG00000273174	---	---	---	12.7725	7.11324	1.7956	0.107498	No	384672
ENSG00000142556	80110	ZNF614	zinc finger protein 614	808.682	822.505	-1.01709	0.71105	No	49143
ENSG00000260060	---	---	---	5.21433	2.90506	1.79491	0.338371	No	708388
ENSG00000088888	57506	MAVS	mitochondrial antiviral signaling protein	6836.23	6952.87	-1.01706	0.558427	No	909675
ENSG00000257110	---	---	---	9.91448	5.52615	1.7941	0.13761	No	260649
ENSG00000232202	---	---	---	9.45547	5.2744	1.79271	0.175768	No	92942
ENSG00000272405	---	---	---	32.5487	18.1574	1.79259	0.0175895	No	1593502
ENSG00000256591	---	---	---	12.6314	7.04713	1.79242	0.119021	No	508358
ENSG00000180992	64928	MRPL14	mitochondrial ribosomal protein L14	2918.51	2967.91	-1.01693	0.551538	No	166371
ENSG00000232883	643779	RPLP0P5	ribosomal protein lateral stalk subunit P0 pseudogene 5	5.46744	5.55988	-1.01691	0.971259	No	352364
ENSG00000151116	55293	UEVLD	UEV and lactate/malate dehyrogenase domains	2214.78	2251.82	-1.01672	0.642161	No	969158
ENSG00000226604	---	---	---	20.3528	11.3566	1.79216	0.0417236	No	3486422
ENSG00000271840	---	---	---	1.97707	1.10365	1.79139	0.453761	No	2825201
ENSG00000268578	---	---	---	2.12982	1.18992	1.78989	0.459088	No	3202608
ENSG00000167721	55720	TSR1	TSR1 ribosome maturation factor	7365.86	7488.94	-1.01671	0.559847	No	808027
ENSG00000266801	---	---	---	5.89171	3.29547	1.78782	0.242651	No	2036039
ENSG00000268225	---	---	---	15.5999	6.7628	2.30672	0.0367475	Yes	783023
ENSG00000143164	55827	DCAF6	DDB1 and CUL4 associated factor 6	5628.73	5722.65	-1.01669	0.521211	No	610648
ENSG00000226149	---	---	---	21.1984	11.8957	1.78202	0.0397972	No	18306
ENSG00000189164	84503	ZNF527	zinc finger protein 527	391.659	398.169	-1.01662	0.835154	No	468030
ENSG00000219699	---	---	---	1.92511	1.08056	1.78159	0.418011	No	429596
ENSG00000236194	---	---	---	4.81136	2.70088	1.7814	0.330897	No	2117870
ENSG00000261581	---	---	---	2.28148	1.28219	1.77936	0.439288	No	4288640
ENSG00000089050	10741	RBBP9	RB binding protein 9, serine hydrolase	2010.88	2044.26	-1.0166	0.58625	No	105472
ENSG00000084731	3797	KIF3C	kinesin family member 3C	4901.92	4983.08	-1.01656	0.524744	No	149923
ENSG00000234208	---	---	---	1.66121	0.933751	1.77907	0.475065	No	869837
ENSG00000267632	---	---	---	26.7404	15.0408	1.77786	0.0273099	No	1880768
ENSG00000253213	---	---	---	2.30891	1.29899	1.77746	0.422375	No	163649
ENSG00000007376	113000	RPUSD1	RNA pseudouridine synthase domain containing 1	2930.36	2978.7	-1.0165	0.575253	No	152840
ENSG00000214045	---	---	---	4.4321	2.49364	1.77736	0.380054	No	2368619
ENSG00000099995	10291	SF3A1	splicing factor 3a subunit 1	10458.5	10629.9	-1.01639	0.456739	No	1691394
ENSG00000227606	---	---	---	2.13615	1.20367	1.7747	0.449352	No	92496
ENSG00000264133	---	---	---	13.2321	7.46031	1.77367	0.0988831	No	416964
ENSG00000260077	---	---	---	34.0531	19.2156	1.77216	0.0130481	No	152648
ENSG00000249602	---	---	---	3.27099	1.84637	1.77158	0.321387	No	1739233
ENSG00000255153	255512	TOLLIP-DT	TOLLIP divergent transcript	7.60839	7.73309	-1.01639	0.971855	No	285713
ENSG00000232368	---	---	---	686.197	299.794	2.2889	5.12403e-13	Yes	7389460
ENSG00000259712	---	---	---	13.4191	5.86346	2.28859	0.0274265	Yes	65109
ENSG00000102580	5611	DNAJC3	DnaJ heat shock protein family (Hsp40) member C3	6091.95	6191.77	-1.01639	0.587127	No	4600
ENSG00000228719	---	---	---	4.65642	2.62851	1.77151	0.306954	No	731574
ENSG00000213197	---	---	---	13.3068	7.51251	1.77129	0.0787509	No	293420
ENSG00000163113	---	---	---	5467.76	3087.98	1.77066	2.4585e-14	No	19531
ENSG00000134285	51303	FKBP11	FKBP prolyl isomerase 11	1031.67	1048.54	-1.01635	0.686167	No	490345
ENSG00000273356	---	---	---	32.0665	14.0244	2.28648	0.00151541	Yes	340345
ENSG00000267157	---	---	---	2.00505	1.13273	1.77011	0.428382	No	785490
ENSG00000213091	---	---	---	12.6844	7.1705	1.76897	0.101907	No	115449
ENSG00000256950	---	---	---	3.22133	1.82106	1.76893	0.345722	No	648551
ENSG00000273381	---	---	---	4.14351	2.34306	1.76842	0.252692	No	8283
ENSG00000253347	---	---	---	6.80046	3.85188	1.76549	0.267792	No	171134
ENSG00000161791	91010	FMNL3	formin like 3	6422.86	6527.56	-1.0163	0.498001	No	114963
ENSG00000125844	6238	RRBP1	ribosome binding protein 1	38735.8	39366.7	-1.01629	0.456831	No	540472
ENSG00000260111	---	---	---	16.1685	7.09012	2.28043	0.0110708	Yes	590402
ENSG00000262096	---	---	---	8.74854	4.95919	1.76411	0.148454	No	860297
ENSG00000129696	80185	TTI2	TELO2 interacting protein 2	812.658	825.879	-1.01627	0.696623	No	4407659
ENSG00000168614	---	---	---	1743.06	766.1	2.27524	5.0552e-15	Yes	625155
ENSG00000184163	388581	C1QTNF12	C1q and TNF related 12	20.2232	20.5516	-1.01624	0.953602	No	1113056
ENSG00000180672	---	---	---	298.249	169.251	1.76217	2.06367e-07	No	60419
ENSG00000258738	112268124	BAZ1A-AS1	BAZ1A antisense RNA 1	199.511	202.735	-1.01616	0.856608	No	213163
ENSG00000213235	387845	EEF1A1P16	eukaryotic translation elongation factor 1 alpha 1 pseudogene 16	18.0855	18.3764	-1.01609	0.95306	No	609290
ENSG00000065883	8621	CDK13	cyclin dependent kinase 13	4123.73	4189.55	-1.01596	0.542305	No	15254
ENSG00000100764	5700	PSMC1	proteasome 26S subunit, ATPase 1	6606	6711.3	-1.01594	0.540428	No	200482
ENSG00000273192	---	---	---	23.9292	13.6095	1.75827	0.018538	No	162077
ENSG00000262304	---	---	---	11.1111	6.32422	1.75691	0.136209	No	361595
ENSG00000236029	---	---	---	2.24623	1.27941	1.75567	0.449482	No	5075388
ENSG00000150768	1737	DLAT	dihydrolipoamide S-acetyltransferase	4158.28	4224.55	-1.01594	0.571305	No	1641707
ENSG00000269388	---	---	---	22.1358	12.6096	1.75547	0.0192254	No	70075
ENSG00000113194	23197	FAF2	Fas associated factor family member 2	5715.88	5806.91	-1.01593	0.566619	No	196392
ENSG00000122971	35	ACADS	acyl-CoA dehydrogenase short chain	161.982	164.553	-1.01588	0.87881	No	1189021
ENSG00000272389	---	---	---	8.11366	3.5814	2.2655	0.0416708	Yes	719769
[truncated: 20,587 more rows]

## Sheet: LORD
ensembl	entrez	symbol	genename	mean.ZNF354A	mean.Ctle	foldChange	padj	diffExpr	ZNF354A_peaks	HEK293_ATF2_peaks.ENCFF182MPY	HepG2_ATF2_peaks.ENCFF994LMJ
ENSG00000151224	4143	A1BG-AS1	A1BG antisense RNA 1	696.057	547.496	1.27134	0.000132829	No	6276022	1928	1869
ENSG00000171658	344887	AIFM2	apoptosis inducing factor mitochondria associated 2	5048.57	2925.94	1.72545	5.5976e-14	No	1178833	33580	33497
ENSG00000112096	6648	ATF2	activating transcription factor 2	3793.38	3572.24	1.06191	0.0339464	No	334627	15438	15268
ENSG00000237406	266625	ATF3	activating transcription factor 3	5602.03	148.327	37.7681	5.51701e-19	Yes	167734	0	0
ENSG00000215845	100131187	ATF4	activating transcription factor 4	20895.5	15772.9	1.32477	2.50272e-09	No	152172	78158	40731
ENSG00000151012	23657	ATF7	activating transcription factor 7	3660.16	2629.46	1.39198	4.25215e-10	No	10209	12982	13001
ENSG00000167996	2495	ATF7IP	activating transcription factor 7 interacting protein	3426.17	3167.95	1.08151	0.0132919	No	107118	1482	1462
ENSG00000112972	3157	BLVRB	biliverdin reductase B	2292.03	1160.14	1.97565	7.61144e-14	No	373773	11502	11485
ENSG00000116761	1491	CTH	cystathionine gamma-lyase	570.701	229.449	2.48726	7.59466e-12	Yes	143346	302	911
ENSG00000087076	51171	CYP19A1	cytochrome P450 family 19 subfamily A member 1	42.8737	2.27082	18.8803	4.95493e-07	Yes	82413	26147	26041
ENSG00000072682	8974	DHCR7	7-dehydrocholesterol reductase	6803.59	4214.44	1.61435	2.87232e-12	No	225373	4410	4268
ENSG00000168003	6520	FDFT1	farnesyl-diphosphate farnesyltransferase 1	12337.5	9689.36	1.27331	1.72965e-09	No	1356011	68378	99734
ENSG00000008394	4257	FDXR	ferredoxin reductase	2834.44	1727.26	1.641	1.14038e-12	No	553258	28635	17179
ENSG00000065621	119391	FTH1	ferritin heavy chain 1	475513	148120	3.21032	8.58694e-22	Yes	29424	17731	5051
ENSG00000267855	4701	FTL	ferritin light chain	180003	73165.2	2.46023	1.82399e-19	Yes	304001	1199	13635
ENSG00000271303	140809	GCH1	GTP cyclohydrolase 1	349.986	217.808	1.60685	2.41424e-06	No	386709	83893	21861
ENSG00000131238	5538	GCLC	glutamate-cysteine ligase catalytic subunit	5406.32	2004.86	2.69661	1.32328e-16	Yes	2600255	19721	12995
ENSG00000148834	9446	GCLM	glutamate-cysteine ligase modifier subunit	7693.55	3723.58	2.06617	4.34675e-16	Yes	51255	7935	4572
ENSG00000143198	4259	GLRX	glutaredoxin	2408.22	1227.45	1.96197	2.62355e-14	No	23895	7845	4224
ENSG00000104687	2936	GLRX2	glutaredoxin 2	1007.67	941.919	1.06981	0.0777756	No	621412	5590	5586
ENSG00000173221	2745	GLRX3	glutaredoxin 3	11639.8	8030.25	1.44949	7.1013e-13	No	153087	33152	1032
ENSG00000113161	3156	GPX3	glutathione peroxidase 3	1455.27	953.591	1.5261	3.00288e-10	No	1058124	16701	16752
ENSG00000086696	3294	GPX4	glutathione peroxidase 4	10843.7	9244.11	1.17304	2.59075e-06	No	2024478	81990	28184
ENSG00000136810	7295	GSR	glutathione-disulfide reductase	6209.58	4270.49	1.45407	4.0068e-12	No	3798310	474	545
ENSG00000167733	374875	GSTO1	glutathione S-transferase omega 1	15482.3	10226.9	1.51388	4.37496e-13	No	310313	16802	16788
ENSG00000042286	84883	GSTO2	glutathione S-transferase omega 2	570.61	261.652	2.1808	4.75711e-11	Yes	343830	16332	16350
ENSG00000087086	2512	HMGCR	3-hydroxy-3-methylglutaryl-CoA reductase	9785.62	5234.48	1.86945	1.59264e-15	No	35907	132340	4757
ENSG00000198431	7296	HMGCS1	3-hydroxy-3-methylglutaryl-CoA synthase 1	13192.6	4825.57	2.7339	1.27165e-17	Yes	379367	11	10016
ENSG00000161513	2232	HSD11B1L	hydroxysteroid 11-beta dehydrogenase 1 like	556.356	315.134	1.76546	2.35123e-09	No	890504	38080	28196
ENSG00000172893	1717	HSD17B10	hydroxysteroid 17-beta dehydrogenase 10	3558.46	2834.93	1.25522	3.48878e-08	No	1135437	77912	77899
ENSG00000131979	2643	HSD17B12	hydroxysteroid 17-beta dehydrogenase 12	9359.95	6526.56	1.43413	2.17718e-12	No	304606	10103	10216
ENSG00000211445	2878	HSD17B14	hydroxysteroid 17-beta dehydrogenase 14	1482.47	597.184	2.48244	4.98424e-15	Yes	432625	13798	35499
ENSG00000132196	51478	HSD17B2	hydroxysteroid 17-beta dehydrogenase 2	161.926	87.6309	1.84782	3.64396e-06	No	2575820	29860	3487
ENSG00000090013	645	HSD17B3	hydroxysteroid 17-beta dehydrogenase 3	5.42817	3.65461	1.4853	0.475559	No	26034	62280	33092
ENSG00000109929	6309	HSD17B4	hydroxysteroid 17-beta dehydrogenase 4	5572.01	5024.61	1.10894	0.000170067	No	2753786	24984	25074
ENSG00000130948	3293	HSD17B7	hydroxysteroid 17-beta dehydrogenase 7	555.339	367.601	1.51071	1.27002e-07	No	73974	63669	7764
ENSG00000147383	50814	HSD17B7P2	hydroxysteroid 17-beta dehydrogenase 7 pseudogene 2	120.331	87.9518	1.36815	0.0139834	No	3099994	86386	97964
ENSG00000122884	5033	HSD3B7	hydroxy-delta-5-steroid dehydrogenase, 3 beta- and steroid delta-isomerase 7	507.37	465.95	1.08889	0.104224	No	554380	133	25442
ENSG00000108010	GPH3	LSS	lanosterol synthase	13355.5	7934.1	1.6833	5.04178e-15	No	709144	84493	103362
ENSG00000149084	51144	MAT1A	methionine adenosyltransferase 1A	120.306	9.07148	13.262	4.49394e-10	Yes	16326	115368	7481
ENSG00000099251	158160	MGST1	microsomal glutathione S-transferase 1	29990.8	13460.6	2.22804	1.22363e-18	Yes	33768	10912	10921
ENSG00000183291	9403	MGST3	microsomal glutathione S-transferase 3	4134.96	3067.71	1.3479	4.88963e-10	No	533779	76277	41833
ENSG00000131871	55829	MSMO1	methylsterol monooxygenase 1	14598.3	7764.65	1.8801	3.64883e-16	No	782003	33438	9465
ENSG00000179918	22928	NDUFA1	NADH:ubiquinone oxidoreductase subunit A1	3424.45	3240.98	1.05661	0.0730192	No	2073889	72094	73330
ENSG00000123131	10549	NDUFA13	NADH:ubiquinone oxidoreductase subunit A13	432.953	383.399	1.12925	0.0664033	No	281051	26108	26053
ENSG00000140830	54957	NDUFA2	NADH:ubiquinone oxidoreductase subunit A2	2347.19	2204.41	1.06477	0.0872431	No	268148	63377	4529
ENSG00000072506	3028	NDUFA3	NADH:ubiquinone oxidoreductase subunit A3	1820.17	1635.62	1.11283	0.00168097	No	2022941	12855	41254
ENSG00000117450	5052	NDUFA3P4	NADH:ubiquinone oxidoreductase subunit A3 pseudogene 4	3.33748	1.08056	3.08867	0.0720815	No	663754	33422	37049
ENSG00000126432	25824	NDUFA4	NDUFA4 mitochondrial complex associated	6113.97	5657.56	1.08067	0.00747259	No	979671	94633	9187
ENSG00000203739	101928673	NDUFA5	NADH:ubiquinone oxidoreductase subunit A5	4241.47	3754.54	1.12969	2.7311e-05	No	67937	0	2343
ENSG00000198832	140606	NDUFA7	NADH:ubiquinone oxidoreductase subunit A7	62.1288	29.2871	2.12137	8.04791e-05	Yes	1326649	0	0
ENSG00000167468	2879	NDUFA9	NADH:ubiquinone oxidoreductase subunit A9	819.685	705.227	1.1623	0.00117297	No	282927	1104	1261
ENSG00000091164	9352	NDUFA9P1	NADH:ubiquinone oxidoreductase subunit A9 pseudogene 1	3.89589	0.49294	7.90338	0.00763732	Yes	708980	5284	6393
ENSG00000153066	51061	NDUFAB1P1	NADH:ubiquinone oxidoreductase subunit AB1 pseudogene 1	2.03208	0.635669	3.19676	0.156911	No	137879	633	653
ENSG00000178980	6415	NDUFAF1	NADH:ubiquinone oxidoreductase complex assembly factor 1	1155.69	1078.45	1.07162	0.0404547	No	1481054	9484	9539
ENSG00000133835	3295	NDUFAF2	NADH:ubiquinone oxidoreductase complex assembly factor 2	1669.63	1386.18	1.20448	2.76216e-05	No	816680	19048	35120
ENSG00000184470	10587	NDUFAF4	NADH:ubiquinone oxidoreductase complex assembly factor 4	1237.48	930.001	1.33062	1.83971e-07	No	912348	366	124545
ENSG00000239264	81567	NDUFAF5	NADH:ubiquinone oxidoreductase complex assembly factor 5	600.097	586.232	1.02365	0.609175	No	107477	8910	3508
ENSG00000099377	80270	NDUFAF7	NADH:ubiquinone oxidoreductase complex assembly factor 7	840.149	677.569	1.23995	4.08549e-05	No	71450	30079	30025
ENSG00000113811	58515	NDUFAF8	NADH:ubiquinone oxidoreductase complex assembly factor 8	1544.5	1457.62	1.05961	0.178985	No	431824	14145	26869
ENSG00000023572	51022	NDUFB11	NADH:ubiquinone oxidoreductase subunit B11	2550.66	2356.57	1.08236	0.00713192	No	296985	47375	87940
ENSG00000113621	79770	NDUFB2	NADH:ubiquinone oxidoreductase subunit B2	3242.97	2966.96	1.09303	0.00618676	No	622344	5751	5770
ENSG00000211450	280636	NDUFB2-AS1	NDUFB2 antisense RNA 1	79.7776	73.8329	1.08052	0.557494	No	628643	284	281
ENSG00000141759	10907	NDUFB4	NADH:ubiquinone oxidoreductase subunit B4	4136.15	3730.09	1.10886	0.00041982	No	850356	2901	2911
ENSG00000100348	25828	NDUFB4P12	NADH:ubiquinone oxidoreductase subunit B4 pseudogene 12	7.52079	7.43242	1.01189	0.977013	No	1128474	250933	19110
ENSG00000138018	85465	NDUFB5	NADH:ubiquinone oxidoreductase subunit B5	3486.24	3479.28	1.002	0.944752	No	835339	56357	22684
ENSG00000068366	2182	NDUFB8	NADH:ubiquinone oxidoreductase subunit B8	1320.3	1220.59	1.08169	0.0301519	No	59467	124476	73923
ENSG00000176387	3291	NDUFB9	NADH:ubiquinone oxidoreductase subunit B9	4809.64	4253.92	1.13064	2.84949e-05	No	1232076	13082	13127
ENSG00000157193	7804	NDUFS1	NADH:ubiquinone oxidoreductase core subunit S1	9394.69	9348.59	1.00493	0.841575	No	320976	70700	5602
ENSG00000233276	2876	NDUFS2	NADH:ubiquinone oxidoreductase core subunit S2	5197.26	4938.6	1.05238	0.0522963	No	302341	19636	27068
ENSG00000132394	60678	NDUFS3	NADH:ubiquinone oxidoreductase core subunit S3	2498.16	2335.54	1.06963	0.0177845	No	568919	220762	33219
ENSG00000109618	51091	NDUFS4	NADH:ubiquinone oxidoreductase subunit S4	2274.29	1987.12	1.14451	0.000490966	No	1053523	269039	17916
ENSG00000125356	4694	NDUFS7	NADH:ubiquinone oxidoreductase core subunit S7	2505.53	2203.31	1.13717	0.000190645	No	1744888	84	122462
ENSG00000130414	4705	NDUFS8	NADH:ubiquinone oxidoreductase core subunit S8	4247.86	4117.85	1.03157	0.252042	No	203918	74796	12383
ENSG00000186010	51079	NDUFV2	NADH:ubiquinone oxidoreductase core subunit V2	111.101	57.4625	1.93345	3.51568e-05	No	363516	22192	22287
ENSG00000131495	4695	NDUFV2-AS1	NDUFV2 antisense RNA 1	47.6979	45.1042	1.0575	0.758939	No	329502	984	11488
ENSG00000170906	4696	NMRAL2P	NmrA like redox sensor 2, pseudogene	829.164	80.6412	10.2821	3.79365e-16	Yes	1305694	196	176
ENSG00000259262	106480806	NQO1	NAD(P)H quinone dehydrogenase 1	45669.1	38790.1	1.17734	3.9621e-07	No	1242909	77957	33785
ENSG00000189043	4697	NSDHL	NAD(P) dependent steroid dehydrogenase-like	3029.87	2075.87	1.45957	2.31342e-10	No	589094	47922	47948
ENSG00000128609	4698	P4HA1	prolyl 4-hydroxylase subunit alpha 1	6488.9	4461.2	1.45452	3.19607e-11	No	557975	57074	57111
ENSG00000184983	4700	P4HA2	prolyl 4-hydroxylase subunit alpha 2	8390.02	3454.25	2.4289	2.22172e-16	Yes	167708	1424	4463
ENSG00000237037	100132273	PPT1	palmitoyl-protein thioesterase 1	9943.33	4964.36	2.00294	4.06978e-16	Yes	2875962	44128	54848
ENSG00000119421	4702	PRDX1	peroxiredoxin 1	26761.6	22014.5	1.21564	2.34232e-09	No	398186	80496	3885
ENSG00000139180	4704	PRDX4	peroxiredoxin 4	5332.09	4084.23	1.30553	3.66012e-10	No	423424	17858	18050
ENSG00000217767	107075303	PRDX5	peroxiredoxin 5	10157.4	8365.33	1.21422	2.46918e-08	No	842276	345	19560
ENSG00000137806	51103	PRDX6-AS1	PRDX6 antisense RNA 1	53.4856	44.7511	1.19518	0.204748	No	352269	102111	27409
ENSG00000164182	91942	SC5D	sterol-C5-desaturase	3624.79	2420.76	1.49738	1.50595e-12	No	891316	3230	3161
ENSG00000123545	29078	SELENOF	selenoprotein F	8159.21	6019.6	1.35544	3.64023e-11	No	307944	47468	47404
ENSG00000101247	79133	SELENOH	selenoprotein H	2930.47	2820.35	1.03904	0.165634	No	4196225	20264	20244
ENSG00000003509	55471	SELENOI	selenoprotein I	4917.01	4876.26	1.00836	0.825423	No	351808	105734	31102
ENSG00000224877	284184	SELENOK	selenoprotein K	1703.24	1585.48	1.07427	0.0415893	No	506083	676	575
ENSG00000140990	4716	SELENOM	selenoprotein M	790.021	669.152	1.18063	0.000374032	No	1099433	2743	2742
ENSG00000147123	54539	SELENOS	selenoprotein S	3678.53	2725.86	1.3495	1.38747e-09	No	11887	633	4735
ENSG00000090266	4708	SELENOW	selenoprotein W	2507.68	2222.55	1.12829	0.0013788	No	1490730	54621	4941
ENSG00000240889	100134713	SEPHS2	selenophosphate synthetase 2	5071.66	3834.48	1.32264	1.34066e-09	No	15362	68185	1245
ENSG00000065518	4710	SLC3A2	solute carrier family 3 member 2	26842.8	11964.7	2.2435	5.43026e-18	Yes	89414	900	880
ENSG00000124399	402175	SLC7A11	solute carrier family 7 member 11	33485.4	9335.29	3.58697	5.48832e-19	Yes	114361	0	0
ENSG00000136521	4711	SOD2	superoxide dismutase 2	65585.9	6766.86	9.69222	7.69725e-19	Yes	390822	7740	5558
ENSG00000099795	4713	SRXN1	sulfiredoxin 1	532.654	260.159	2.04742	1.39503e-10	Yes	132921	31906	31932
ENSG00000166136	4714	TSTD1	thiosulfate sulfurtransferase like domain containing 1	3.9316	0.78899	4.98308	0.0209894	Yes	144226	2212	2267
ENSG00000147684	4715	TXN	thioredoxin	26295.4	14683.7	1.79078	4.45293e-17	No	418789	14272	3257
ENSG00000109390	4717	TXN2	thioredoxin 2	4053.78	3959.67	1.02377	0.392687	No	704488	266	188
ENSG00000151366	4718	TXNDC11	thioredoxin domain containing 11	2555.85	2218.02	1.15231	2.33104e-05	No	1451931	26828	26876
ENSG00000023228	4719	TXNDC15	thioredoxin domain containing 15	3613.67	3459.5	1.04457	0.0880515	No	109152	28483	34867
ENSG00000158864	4720	TXNDC5	thioredoxin domain containing 5	990.601	895.826	1.1058	0.0204029	No	1943399	1874	1856
ENSG00000213619	4722	TXNL1	thioredoxin like 1	5563.12	4777.21	1.16451	9.03324e-07	No	6423295	11073	10993
ENSG00000052802	6307	TXNL4A	thioredoxin like 4A	3560.78	3465.2	1.02758	0.354571	No	29898413	72675	72660
ENSG00000160285	4047	TXNL4B	thioredoxin like 4B	1116.18	865.018	1.29035	3.11551e-06	No	488236	68856	19595
ENSG00000023909	2730	TXNRD1	thioredoxin reductase 1	123573	75210.3	1.64304	6.16745e-16	No	72320	3585	3028
ENSG00000001084	2729	TXNRD2	thioredoxin reductase 2	2238.31	2019.98	1.10808	0.00376767	No	106689	6011	24530
ENSG00000104549	6713	SQLE	squalene epoxidase	6238.51	4604.52	1.35487	2.40821e-10	No	1691471	93148	40369
ENSG00000158473	912	CD1D	CD1d molecule	4.64511	0.635669	7.30744	0.00317716	Yes	58443	66665	3606
ENSG00000184979	11274	USP18	ubiquitin specific peptidase 18	325.383	103.21	3.15265	6.52862e-06	Yes	1003829	4716	4752
				symbol	genename	FC RNAseq siZNF354A	P - value	ZNF354A_peaks (distance - bp)		symbol	genename	_log10p
				SELENOS	selenoprotein S	1.3495	1.38747e-09	11887		ATF3	activating transcription factor 3	#REF!
				SEPHS2	selenophosphate synthetase 2	1.32264	1.34066e-09	15362		CYP19A1	cytochrome P450 family 19 subfamily A member 1	#REF!
				MAT1A	methionine adenosyltransferase 1A	13.262	4.49394e-10	16326		MAT1A	methionine adenosyltransferase 1A	#REF!
				HSD17B3	hydroxysteroid 17-beta dehydrogenase 3	1.4853	0.475559	26034		NMRAL2P	NmrA like redox sensor 2, pseudogene	#REF!
				FTH1	ferritin heavy chain 1	3.21032	8.58694e-22	29424		SOD2	superoxide dismutase 2	#REF!
				MGST1	microsomal glutathione S-transferase 1	2.22804	1.22363e-18	33768		NDUFA9P1	NADH:ubiquinone oxidoreductase subunit A9 pseudogene 1	#REF!
				HMGCR	3-hydroxy-3-methylglutaryl-CoA reductase	1.86945	1.59264e-15	35907		TSTD1	thiosulfate sulfurtransferase like domain containing 1	#REF!
				GPX6	glutathione peroxidase 6	NA	NA	47542		SLC7A11	solute carrier family 7 member 11	#REF!
				SEPSECS	Sep (O-phosphoserine) tRNA:Sec (selenocysteine) tRNA synthase	-1.06867	0.229425	71315		FTH1	ferritin heavy chain 1	#REF!
				TXNRD1	thioredoxin reductase 1	1.64304	6.16745e-16	72320		NDUFAB1P1	NADH:ubiquinone oxidoreductase subunit AB1 pseudogene 1	#REF!
				HSD17B7	hydroxysteroid 17-beta dehydrogenase 7	1.51071	1.27002e-07	73974		NDUFA3P4	NADH:ubiquinone oxidoreductase subunit A3 pseudogene 4	#REF!
				SLC3A2	solute carrier family 3 member 2	2.2435	5.43026e-18	89414		HMGCS1	3-hydroxy-3-methylglutaryl-CoA synthase 1	#REF!
				SLC7A11	solute carrier family 7 member 11	3.58697	5.48832e-19	114361		CTH	cystathionine gamma-lyase	#REF!
				SRXN1	sulfiredoxin 1	2.04742	1.39503e-10	132921		HSD17B14	hydroxysteroid 17-beta dehydrogenase 14	#REF!
				CTH	cystathionine gamma-lyase	2.48726	7.59466e-12	143346		P4HA2	prolyl 4-hydroxylase subunit alpha 2	#REF!
				TSTD1	thiosulfate sulfurtransferase like domain containing 1	4.98308	0.0209894	144226		SLC3A2	solute carrier family 3 member 2	#REF!
				P4HA2	prolyl 4-hydroxylase subunit alpha 2	2.4289	2.22172e-16	167708		MGST1	microsomal glutathione S-transferase 1	#REF!
				HMOX1	heme oxygenase 1	40.1503	5.17441e-20	190883		GSTO2	glutathione S-transferase omega 2	#REF!
				EEFSEC	eukaryotic elongation factor, selenocysteine-tRNA specific	-1.06656	0.15381	194017		NDUFA7	NADH:ubiquinone oxidoreductase subunit A7	#REF!
				DHCR7	7-dehydrocholesterol reductase	1.61435	2.87232e-12	225373		SRXN1	sulfiredoxin 1	#REF!
				HSD17B12	hydroxysteroid 17-beta dehydrogenase 12	1.43413	2.17718e-12	304606		PPT1	palmitoyl-protein thioesterase 1	#REF!
				SELENOF	selenoprotein F	1.35544	3.64023e-11	307944		GLRX	glutaredoxin	#REF!
				GSTO2	glutathione S-transferase omega 2	2.1808	4.75711e-11	343830		NDUFV2	NADH:ubiquinone oxidoreductase core subunit V2	#REF!
				HMGCS1	3-hydroxy-3-methylglutaryl-CoA synthase 1	2.7339	1.27165e-17	379367		HMGCR	3-hydroxy-3-methylglutaryl-CoA reductase	#REF!
				GCH1	GTP cyclohydrolase 1	1.60685	2.41424e-06	386709		HSD17B2	hydroxysteroid 17-beta dehydrogenase 2	#REF!
				SOD2	superoxide dismutase 2	9.69222	7.69725e-19	390822		TXN	thioredoxin	#REF!
				HSD17B14	hydroxysteroid 17-beta dehydrogenase 14	2.48244	4.98424e-15	432625		HSD11B1L	hydroxysteroid 11-beta dehydrogenase 1 like	#REF!
				P4HA1	prolyl 4-hydroxylase subunit alpha 1	1.45452	3.19607e-11	557975		AIFM2	apoptosis inducing factor mitochondria associated 2	#REF!
				NSDHL	NAD(P) dependent steroid dehydrogenase-like	1.45957	2.31342e-10	589094		TXNRD1	thioredoxin reductase 1	#REF!
				NDUFA9P1	NADH:ubiquinone oxidoreductase subunit A9 pseudogene 1	7.90338	0.00763732	708980		FDXR	ferredoxin reductase	#REF!
				SC5D	sterol-C5-desaturase	1.49738	1.50595e-12	891316		DHCR7	7-dehydrocholesterol reductase	#REF!
				GPX3	glutathione peroxidase 3	1.5261	3.00288e-10	1058124		GCH1	GTP cyclohydrolase 1	#REF!
				AIFM2/FSP1	Ferroptosis Supressor protein 1	1.72545	5.5976e-14	1178833		GPX3	glutathione peroxidase 3	#REF!
				NMRAL2P	NmrA like redox sensor 2, pseudogene (functional-PMID: 27860235)	10.2821	3.79365e-16	1305694		HSD17B7	hydroxysteroid 17-beta dehydrogenase 7	#REF!
				NDUFA7	NADH:ubiquinone oxidoreductase subunit A7	2.12137	8.04791e-05	1326649		SC5D	sterol-C5-desaturase	#REF!
				HSD17B2	hydroxysteroid 17-beta dehydrogenase 2	1.84782	3.64396e-06	2575820		HSD17B3	hydroxysteroid 17-beta dehydrogenase 3	#REF!
				PPT1	palmitoyl-protein thioesterase 1	2.00294	4.06978e-16	2875962		NSDHL	NAD(P) dependent steroid dehydrogenase-like	#REF!
				CYP51A1	cytochrome P450 family 51 subfamily A member 1	1.73329	1.56829e-11	192562		P4HA1	prolyl 4-hydroxylase subunit alpha 1	#REF!
				AKR1B1	aldo-keto reductase family 1 member B	3.17074	5.42527e-19	145331		GLRX3	glutaredoxin 3	#REF!
				AKR1B10	aldo-keto reductase family 1 member B10	2.65612	1.95307e-09	213640		HSD17B12	hydroxysteroid 17-beta dehydrogenase 12	#REF!
				AKR1B1P1	aldehyde reductase family 1 member B1 pseudogene 1	3.05182	0.00631816	97235		ATF7	activating transcription factor 7	#REF!
				AKR1C1	aldo-keto reductase family 1 member C1	9.20472	3.00863e-11	223325		ATF7	activating transcription factor 7	#REF!
				AKR1C2	aldo-keto reductase family 1 member C2	6.20264	7.5017e-10	348751		HSD17B7P2	hydroxysteroid 17-beta dehydrogenase 7 pseudogene 2	#REF!
				AKR1C3	aldo-keto reductase family 1 member C3	3.86735	1.22363e-18	366075		SELENOF	selenoprotein F	#REF!
				AKR1C7P	aldo-keto reductase family 1 member C7, pseudogene	4.4824	0.00475164	618961		SELENOS	selenoprotein S	#REF!
				AKR1D1	aldo-keto reductase family 1 member D1	3.35696	0.0814335	855432		NDUFAF4	NADH:ubiquinone oxidoreductase complex assembly factor 4	#REF!
				AKR7A3	aldo-keto reductase family 7 member A3	1.15468	0.55603	13838		ATF4	activating transcription factor 4	#REF!
				AKR7L	aldo-keto reductase family 7 like (gene/pseudogene)	1.67637	0.0409521	735		ATF4	activating transcription factor 4	#REF!
				GLRX	glutaredoxin	1.96197	2.62355e-14	23895		SEPHS2	selenophosphate synthetase 2	#REF!
				GLRX2	glutaredoxin 2	1.06981	0.0777756	621412		PRDX4	peroxiredoxin 4	#REF!
				GLRX3	glutaredoxin 3	1.44949	7.1013e-13	153087		TXNL4B	thioredoxin like 4B	#REF!
				PRDX1	peroxiredoxin 1	1.21564	2.34232e-09	398186		FDFT1	farnesyl-diphosphate farnesyltransferase 1	#REF!
				PRDX4	peroxiredoxin 4	1.30553	3.66012e-10	423424		A1BG-AS1	A1BG antisense RNA 1	#REF!
				PRDX5	peroxiredoxin 5	1.21422	2.46918e-08	842276		HSD17B10	hydroxysteroid 17-beta dehydrogenase 10	#REF!
										NDUFAF7	NADH:ubiquinone oxidoreductase complex assembly factor 7	#REF!
										PRDX1	peroxiredoxin 1	#REF!
										PRDX5	peroxiredoxin 5	#REF!
										NDUFAF2	NADH:ubiquinone oxidoreductase complex assembly factor 2	#REF!
										PRDX6-AS1	PRDX6 antisense RNA 1	#REF!
										SELENOM	selenoprotein M	#REF!
										NQO1	NAD(P)H quinone dehydrogenase 1	#REF!
										GPX4	glutathione peroxidase 4	#REF!
										TXNL1	thioredoxin like 1	#REF!
										NDUFA9	NADH:ubiquinone oxidoreductase subunit A9	#REF!
										TXNDC11	thioredoxin domain containing 11	#REF!
										NDUFS4	NADH:ubiquinone oxidoreductase subunit S4	#REF!
										NDUFS7	NADH:ubiquinone oxidoreductase core subunit S7	#REF!
										NDUFB9	NADH:ubiquinone oxidoreductase subunit B9	#REF!
										NDUFA5	NADH:ubiquinone oxidoreductase subunit A5	#REF!
										NDUFA13	NADH:ubiquinone oxidoreductase subunit A13	#REF!
										SELENOW	selenoprotein W	#REF!
										NDUFA3	NADH:ubiquinone oxidoreductase subunit A3	#REF!
										HSD17B4	hydroxysteroid 17-beta dehydrogenase 4	#REF!
										NDUFB4	NADH:ubiquinone oxidoreductase subunit B4	#REF!
										TXNRD2	thioredoxin reductase 2	#REF!
										TXNDC5	thioredoxin domain containing 5	#REF!
										NDUFB2	NADH:ubiquinone oxidoreductase subunit B2	#REF!
										HSD3B7	hydroxy-delta-5-steroid dehydrogenase, 3 beta- and steroid delta-isomerase 7	#REF!
										NDUFB11	NADH:ubiquinone oxidoreductase subunit B11	#REF!
										NDUFB8	NADH:ubiquinone oxidoreductase subunit B8	#REF!
										ATF7IP	activating transcription factor 7 interacting protein	#REF!
										ATF7IP	activating transcription factor 7 interacting protein	#REF!
										NDUFA4	NDUFA4 mitochondrial complex associated	#REF!
										NDUFB2-AS1	NDUFB2 antisense RNA 1	#REF!
										SELENOK	selenoprotein K	#REF!
										NDUFAF1	NADH:ubiquinone oxidoreductase complex assembly factor 1	#REF!
										GLRX2	glutaredoxin 2	#REF!
										NDUFS3	NADH:ubiquinone oxidoreductase core subunit S3	#REF!
										NDUFA2	NADH:ubiquinone oxidoreductase subunit A2	#REF!
										ATF2	activating transcription factor 2	#REF!
										NDUFAF8	NADH:ubiquinone oxidoreductase complex assembly factor 8	#REF!
										NDUFV2-AS1	NDUFV2 antisense RNA 1	#REF!
										NDUFA1	NADH:ubiquinone oxidoreductase subunit A1	#REF!
										NDUFS2	NADH:ubiquinone oxidoreductase core subunit S2	#REF!
										TXNDC15	thioredoxin domain containing 15	#REF!
										SELENOH	selenoprotein H	#REF!
										NDUFS8	NADH:ubiquinone oxidoreductase core subunit S8	#REF!
										TXNL4A	thioredoxin like 4A	#REF!
										TXN2	thioredoxin 2	#REF!
										NDUFAF5	NADH:ubiquinone oxidoreductase complex assembly factor 5	#REF!
										NDUFB4P12	NADH:ubiquinone oxidoreductase subunit B4 pseudogene 12	#REF!
										SELENOI	selenoprotein I	#REF!
										NDUFS1	NADH:ubiquinone oxidoreductase core subunit S1	#REF!
										NDUFB5	NADH:ubiquinone oxidoreductase subunit B5	#REF!
								Distance too TSS
									HEK293T	HepG2
						foldChangesiZNF354A	padj	ZNF354A_peaks	ATF2_peaks.ENCFF182MPY	ATF2_peaks.ENCFF994LMJ
				PRDX1	peroxiredoxin 1	1.21564	2.34232e-09	398186	80496	3885
				PRDX4	peroxiredoxin 4	1.30553	3.66012e-10	423424	17858	18050
				PRDX5	peroxiredoxin 5	1.21422	2.46918e-08	842276	345	19560
				PRDX6-AS1	PRDX6 antisense RNA 1	1.19518	0.204748	352269	102111	27409

## Sheet: CHiPZNF354a
Symbol ChIP ZNF354A	Species assembly: hg19
MAT1A	MACS_peak_561 (-28062), MACS_peak_560 (-16487)
SLC7A11	MACS_peak_2754 (-114554)
P4HA2	MACS_peak_2996 (+100467)
MGST1	MACS_peak_843 (+33368)
HMGCR	MACS_peak_2902 (-36936)
TXNRD1	MACS_peak_948 (+72592)
SCD5	MACS_peak_2648 (+34534)
DHCR7	MACS_peak_734 (+221198)
HSD17B7	MACS_peak_256 (+74207)
HSD17B3	MACS_peak_3870 (+26273)
HSD17B12	MACS_peak_715 (+180622)
SEPHS2	MACS_peak_1503 (+15386)
EEFSEC	MACS_peak_2479 (+194202)
SEPSECS	MACS_peak_2587 (-71731)
ABCB1	MACS_peak_3525 (+81146)
ABCB4	MACS_peak_3525 (-156363)
ABCC4	MACS_peak_1199 (-200335)
ABCD3	MACS_peak_169 (-175616)
ABHD3	MACS_peak_1671 (+14177)
ABI3BP	MACS_peak_2438 (-117029), MACS_peak_2437 (-65993)
ABLIM1	MACS_peak_627 (-157236)
ACAD9	MACS_peak_2482 (-141049)
ACO1	MACS_peak_3804 (+21628)
ACSF3	MACS_peak_1551 (+35784)
ACSM1	MACS_peak_1492 (+1804)
ACSM2B	MACS_peak_1492 (-113085)
ACSM4	MACS_peak_824 (+28767)
ACTBL2	MACS_peak_2873 (+7202)
ACTN1	MACS_peak_1291 (+143681)
ACTN2	MACS_peak_411 (-81571)
ACVR1B	MACS_peak_891 (-6936)
ACVR1C	MACS_peak_2019 (+14009)
ACVR2B	MACS_peak_2341 (-67556)
ACVRL1	MACS_peak_891 (+37347)
ACYP2	MACS_peak_1867 (-509)
ADAM12	MACS_peak_650 (+84008)
ADAM20	MACS_peak_1295 (-14320)
ADAM22	MACS_peak_3526 (-13676)
ADAMTS15	MACS_peak_809 (+45721)
ADAMTS18	MACS_peak_1544 (+28309)
ADAMTS20	MACS_peak_872 (-4379)
ADAMTS6	MACS_peak_2889 (-77930), MACS_peak_2887 (-1885), MACS_peak_2886 (+262700)
ADAMTS7	MACS_peak_1410 (+89498)
ADAMTSL3	MACS_peak_1420 (+129388), MACS_peak_1422 (+208677)
ADARB1	MACS_peak_2240 (+142582)
ADCY1	MACS_peak_3476 (-239490)
ADCY5	MACS_peak_2470 (+182530)
ADCY7	MACS_peak_1515 (-63574)
ADCY9	MACS_peak_1478 (+53678)
ADGB	MACS_peak_3327 (+276229)
ADO	MACS_peak_527 (-272418), MACS_peak_528 (-197931)
ADPGK	MACS_peak_1400 (+16839)
ADRA1A	MACS_peak_3652 (-64054)
ADRA2A	MACS_peak_619 (-144240)
ADSL	MACS_peak_2281 (-166841)
AEBP2	MACS_peak_844 (+40211)
AEN	MACS_peak_1442 (-23574)
AFF3	MACS_peak_1932 (+39906)
AFM	MACS_peak_2632 (+84046)
AGBL1	MACS_peak_1433 (-295506)
AGBL3	MACS_peak_3592 (+134073)
AGO2	MACS_peak_3774 (-263016)
AGPS	MACS_peak_2055 (+35630)
AGTPBP1	MACS_peak_3842 (+9070)
AGTR2	MACS_peak_4065 (+133697), MACS_peak_4066 (+227548)
AGXT	MACS_peak_2142 (-45019), MACS_peak_2143 (+101926)
AHCYL2	MACS_peak_3584 (+99349)
AHI1	MACS_peak_3293 (+136852)
AIG1	MACS_peak_3316 (+70277)
AKAP1	MACS_peak_1605 (+166247)
AKAP10	MACS_peak_1573 (-35597)
AKAP12	MACS_peak_3338 (-164819)
AKAP13	MACS_peak_1427 (-235018), MACS_peak_1428 (+32236)
AKAP4	MACS_peak_3968 (+177455)
AKR1E2	MACS_peak_452 (-157144)
AKR7A3	MACS_peak_12 (+14080)
AKT1	MACS_peak_1330 (+27696)
AKT3	MACS_peak_438 (-24904), MACS_peak_437 (-18151), MACS_peak_436 (+14069), MACS_peak_435 (+216285)
ALB	MACS_peak_2631 (-41962)
ALDH1A3	MACS_peak_1465 (-132956), MACS_peak_1466 (-57520)
ALDH3B2	MACS_peak_732 (-151816)
ALG13	MACS_peak_4056 (-149749)
ALG6	MACS_peak_77 (+74358), MACS_peak_78 (+147731)
ALKBH3	MACS_peak_715 (-19508)
ALPK1	MACS_peak_2710 (+176899), MACS_peak_2711 (+181228)
ALPP	MACS_peak_2133 (-225384)
ALX4	MACS_peak_716 (+56984)
AMD1	MACS_peak_3228 (+31742)
AMIGO2	MACS_peak_884 (-217113)
AMMECR1	MACS_peak_4055 (-289559)
AMOT	MACS_peak_4059 (+102481)
ANAPC16	MACS_peak_541 (-119554), MACS_peak_542 (-118975), MACS_peak_543 (-31786)
ANGPTL1	MACS_peak_299 (+136348)
ANKHD1	MACS_peak_3013 (-22512)
ANKIB1	MACS_peak_3534 (+89550)
ANKRD10	MACS_peak_1208 (+163714)
ANKRD13C	MACS_peak_103 (+87155)
ANKRD17	MACS_peak_2631 (-103492)
ANKRD26	MACS_peak_489 (-8539)
ANKRD9	MACS_peak_1322 (+108703)
ANKS1A	MACS_peak_3131 (+216006)
ANLN	MACS_peak_3464 (-132992)
ANO1	MACS_peak_733 (-33912)
ANO10	MACS_peak_2353 (+269142), MACS_peak_2352 (+286041)
ANO3	MACS_peak_695 (-40063)
ANO7	MACS_peak_2145 (-16523)
ANO9	MACS_peak_661 (+16580)
ANP32D	MACS_peak_886 (-36762)
ANXA2R	MACS_peak_2852 (+109282), MACS_peak_2851 (+178202)
AOC1	MACS_peak_3624 (-17838)
AP3M2	MACS_peak_3658 (-98154), MACS_peak_3659 (-93312)
AP5M1	MACS_peak_1272 (-161915)
APBA3	MACS_peak_1756 (-833)
APOF	MACS_peak_896 (-32267), MACS_peak_895 (-29741)
APPBP2	MACS_peak_1610 (+53159)
APPL1	MACS_peak_2382 (+1721)
ARFGAP2	MACS_peak_720 (+180890)
ARFGEF1	MACS_peak_3687 (-13235), MACS_peak_3686 (+30575)
ARG1	MACS_peak_3284 (-97971)
ARHGAP12	MACS_peak_495 (+82964)
ARHGAP18	MACS_peak_3278 (+139101)
ARHGAP22	MACS_peak_513 (-36409)
ARHGAP29	MACS_peak_169 (-5274)
ARHGAP32	MACS_peak_802 (+33898)
ARHGAP36	MACS_peak_4098 (+97985)
ARHGAP44	MACS_peak_1562 (+99497)
ARHGAP6	MACS_peak_3928 (-43534)
ARHGAP8	MACS_peak_2290 (+132512)
ARHGEF12	MACS_peak_790 (+56245), MACS_peak_791 (+63809)
ARID1A	MACS_peak_15 (+2424)
ARID5B	MACS_peak_526 (+271412)
ARL17B	MACS_peak_1600 (-135525)
ARL5A	MACS_peak_2012 (-267802)
ARL6IP1	MACS_peak_1491 (-23580)
ARL9	MACS_peak_2607 (+73230)
AS3MT	MACS_peak_607 (+18717)
ASB1	MACS_peak_2136 (-42914)
ASB12	MACS_peak_3977 (-69923)
ASB14	MACS_peak_2382 (+63224)
ASB7	MACS_peak_1465 (+143886), MACS_peak_1466 (+219322)
ASCL2	MACS_peak_663 (+41062)
ASPDH	MACS_peak_1801 (-19261)
ASPG	MACS_peak_1326 (+38415)
ASPM	MACS_peak_331 (-384)
ASRGL1	MACS_peak_726 (-29310), MACS_peak_727 (+41250)
ASXL2	MACS_peak_1827 (+45966)
ATAD2	MACS_peak_3763 (+89765)
ATF7	MACS_peak_892 (-10403)
ATF7IP	MACS_peak_841 (+107377)
ATF7IP2	MACS_peak_1484 (-95409)
ATG5	MACS_peak_3221 (+65413)
ATM	MACS_peak_779 (+52477), MACS_peak_781 (+230537)
ATP11A	MACS_peak_1209 (-94515)
ATP1B1	MACS_peak_269 (+149845), MACS_peak_270 (+177551)
ATP2A3	MACS_peak_1556 (-64307), MACS_peak_1555 (-33850)
ATP2B1	MACS_peak_933 (-36395)
ATP2B2	MACS_peak_2310 (-133022)
ATP5G2	MACS_peak_892 (+39515)
ATP5J	MACS_peak_2220 (-85865)
ATP5O	MACS_peak_2228 (-43914)
ATP6V0A4	MACS_peak_3598 (-59785)
ATP6V1D	MACS_peak_1289 (-8837)
ATP6V1H	MACS_peak_3667 (+202598)
ATP8A1	MACS_peak_2595 (-112664)
ATRNL1	MACS_peak_628 (-110445)
ATRX	MACS_peak_4004 (+218902), MACS_peak_4003 (+246284)
ATXN1	MACS_peak_3096 (-155750), MACS_peak_3095 (-152423), MACS_peak_3094 (-32792)
ATXN7L3B	MACS_peak_919 (-30281)
AUH	MACS_peak_3850 (+160103)
AVL9	MACS_peak_3459 (+196460)
AVPR1A	MACS_peak_903 (-87299)
AXIN1	MACS_peak_1473 (+32806)
AXIN2	MACS_peak_1623 (+210604)
B3GAT2	MACS_peak_3169 (+84467)
B3GNTL1	MACS_peak_1646 (+58684)
B4GALT6	MACS_peak_1694 (+23842)
BAAT	MACS_peak_3878 (+277405)
BACH2	MACS_peak_3201 (-72145)
BAIAP2L1	MACS_peak_3544 (-106728)
BANK1	MACS_peak_2686 (+87596)
BARX1	MACS_peak_3860 (+169019), MACS_peak_3859 (+238281)
BARX2	MACS_peak_805 (+126039)
BAZ2B	MACS_peak_2024 (+1540)
BBIP1	MACS_peak_618 (+2097)
BBS4	MACS_peak_1400 (+80759)
BBX	MACS_peak_2450 (+87834), MACS_peak_2451 (+173177)
BCAR3	MACS_peak_167 (-10738)
BCHE	MACS_peak_2529 (+263133)
BCL2L10	MACS_peak_1357 (-53103)
BCL2L11	MACS_peak_1966 (+93159)
BCL2L14	MACS_peak_835 (-163099)
BCL9	MACS_peak_225 (-235516), MACS_peak_227 (-142810)
BCR	MACS_peak_2255 (+248628)
BDH1	MACS_peak_2555 (-167047)
BDH2	MACS_peak_2694 (-56098)
BEND7	MACS_peak_464 (-48636)
BEST1	MACS_peak_724 (-12463)
BEX4	MACS_peak_4043 (-34272)
BIRC2	MACS_peak_775 (+25988)
BIRC6	MACS_peak_1838 (+100279)
BMP4	MACS_peak_1265 (-279264)
BNIP3	MACS_peak_657 (-90638)
BNIP3L	MACS_peak_3650 (-47442)
BOC	MACS_peak_2457 (+103630)
BPTF	MACS_peak_1630 (+16111)
BRD1	MACS_peak_2299 (+265941)
BRD7	MACS_peak_1516 (-74030)
BRE	MACS_peak_1830 (-18416)
BRINP3	MACS_peak_323 (-256700)
BRIP1	MACS_peak_1615 (+92619), MACS_peak_1614 (+146972), MACS_peak_1613 (+164226)
BROX	MACS_peak_372 (+56759), MACS_peak_373 (+68782)
BTBD16	MACS_peak_642 (-204676)
BVES	MACS_peak_3219 (+83012)
C10orf11	MACS_peak_551 (-225433)
C10orf12	MACS_peak_599 (-88425)
C11orf30	MACS_peak_742 (+43056)
C11orf44	MACS_peak_809 (-178261)
C11orf49	MACS_peak_720 (+59414)
C11orf65	MACS_peak_781 (+14162), MACS_peak_779 (+192222)
C11orf87	MACS_peak_782 (-240612), MACS_peak_783 (-142175)
C12orf5	MACS_peak_822 (+44725)
C14orf164	MACS_peak_1220 (+82613)
C14orf39	MACS_peak_1277 (+60977)
C15orf39	MACS_peak_1403 (-113005)
C15orf61	MACS_peak_1377 (-176238)
C16orf78	MACS_peak_1512 (-54271)
C17orf97	MACS_peak_1552 (-41901)
C1orf101	MACS_peak_439 (+86527), MACS_peak_440 (+95094), MACS_peak_442 (+171368)
C1orf115	MACS_peak_367 (-19460)
C1orf94	MACS_peak_27 (+124447)
C1QL2	MACS_peak_1971 (+61007)
C1QTNF6	MACS_peak_2277 (+1614)
C22orf29	MACS_peak_2247 (+20042)
C2CD5	MACS_peak_852 (+159847), MACS_peak_851 (+176412)
C2orf40	MACS_peak_1951 (-231098), MACS_peak_1952 (+22475)
C2orf88	MACS_peak_2078 (-49970)
C3AR1	MACS_peak_826 (+20287)
C3orf20	MACS_peak_2316 (+104174)
C3orf33	MACS_peak_2520 (-36795)
C4orf33	MACS_peak_2744 (-229620), MACS_peak_2745 (-39537)
C5orf15	MACS_peak_3005 (+5040)
C5orf38	MACS_peak_2833 (+189661)
C5orf64	MACS_peak_2880 (+124327)
C6orf10	MACS_peak_3128 (+90124)
C6orf15	MACS_peak_3125 (+89031)
C6orf57	MACS_peak_3167 (-127251)
C9orf3	MACS_peak_3868 (+131596)
C9orf47	MACS_peak_3849 (-132875)
C9orf69	MACS_peak_3922 (-44591), MACS_peak_3921 (+49968)
C9orf89	MACS_peak_3857 (+4234)
CAB39L	MACS_peak_1029 (+134830)
CACHD1	MACS_peak_79 (+119625)
CACNA1E	MACS_peak_305 (-199934)
CACNA1I	MACS_peak_2279 (+101405)
CACNA2D3	MACS_peak_2371 (+275652)
CACNB4	MACS_peak_2012 (+2789)
CACNG1	MACS_peak_1628 (+71760)
CACNG5	MACS_peak_1627 (-288954)
CADPS	MACS_peak_2392 (-262972)
CALB2	MACS_peak_1534 (+69809)
CALM1	MACS_peak_1310 (+237481)
CALM2	MACS_peak_1862 (-146458)
CAMK2D	MACS_peak_2714 (+267943)
CAMSAP2	MACS_peak_339 (+61107)
CAPN13	MACS_peak_1834 (+250919)
CAPZA2	MACS_peak_3570 (+33701)
CASP7	MACS_peak_625 (+83716)
CATSPER3	MACS_peak_3007 (+15335)
CAV2	MACS_peak_3568 (-152838), MACS_peak_3569 (-125976)
CBLN1	MACS_peak_1512 (-37721)
CC2D1B	MACS_peak_52 (+50370)
CCDC148	MACS_peak_2021 (+46342)
CCDC150	MACS_peak_2088 (+45369)
CCDC167	MACS_peak_3133 (+32009)
CCDC180	MACS_peak_3871 (-118348), MACS_peak_3872 (-11191)
CCDC6	MACS_peak_521 (-1583)
CCDC60	MACS_peak_968 (+201680)
CCDC67	MACS_peak_759 (+31070)
CCDC71L	MACS_peak_3557 (+181956)
CCDC88A	MACS_peak_1868 (+93518)
CCDC91	MACS_peak_862 (+7099)
CCER2	MACS_peak_1789 (+10354)
CCNY	MACS_peak_499 (-80692)
CCSER2	MACS_peak_565 (+167266)
CD163L1	MACS_peak_824 (+111134)
CD1A	MACS_peak_244 (-15490)
CD1D	MACS_peak_244 (+58700)
CD2	MACS_peak_203 (+143138)
CD44	MACS_peak_708 (-194327)
CD48	MACS_peak_250 (+42355)
CD70	MACS_peak_1758 (+19815)
CD82	MACS_peak_717 (+78502)
CDADC1	MACS_peak_1029 (+18844)
CDAN1	MACS_peak_1349 (-146645)
CDC42BPA	MACS_peak_386 (-233525)
CDC42EP3	MACS_peak_1848 (+206185)
CDCA2	MACS_peak_3647 (+154317)
CDCA7	MACS_peak_2044 (-212041), MACS_peak_2045 (-22775), MACS_peak_2046 (-1096)
CDH15	MACS_peak_1551 (-42174)
CDK13	MACS_peak_3466 (+15465)
CDK15	MACS_peak_2095 (+207601)
CDK17	MACS_peak_943 (+82558)
CDK20	MACS_peak_3846 (-66875)
CDK5R1	MACS_peak_1589 (+162107)
CDK6	MACS_peak_3535 (+128890)
CDKAL1	MACS_peak_3104 (+60272)
CDKN3	MACS_peak_1265 (-160880)
CDR2	MACS_peak_1494 (+36737)
CDYL	MACS_peak_3080 (+104710)
CEL	MACS_peak_3916 (+32982)
CELF4	MACS_peak_1723 (-250169)
CELF6	MACS_peak_1398 (-3860)
CENPE	MACS_peak_2694 (+42428)
CENPK	MACS_peak_2889 (+3321), MACS_peak_2887 (+79366)
CENPL	MACS_peak_287 (+10425)
CENPP	MACS_peak_3853 (+48646)
CENPQ	MACS_peak_3150 (+10368)
CENPW	MACS_peak_3268 (+12571)
CEP112	MACS_peak_1625 (+40705)
CEP128	MACS_peak_1304 (-9924)
CEP170	MACS_peak_432 (+47933)
CEP72	MACS_peak_2829 (+3305)
CEPT1	MACS_peak_191 (-139823)
CES5A	MACS_peak_1522 (-225581)
CFHR1	MACS_peak_330 (-32349)
CFHR3	MACS_peak_330 (+12613)
CFL2	MACS_peak_1234 (+52884)
CGRRF1	MACS_peak_1267 (+6047)
CHCHD6	MACS_peak_2474 (-13758)
CHD1L	MACS_peak_225 (+63332), MACS_peak_227 (+156038)
CHD2	MACS_peak_1448 (+63300)
CHIC2	MACS_peak_2602 (+20846)
CHM	MACS_peak_4018 (-2376)
CHMP6	MACS_peak_1645 (-184690)
CHN1	MACS_peak_2050 (+171672)
CHRDL1	MACS_peak_4055 (+188013)
CHRM1	MACS_peak_728 (-24080)
CHRM2	MACS_peak_3596 (+272348)
CHRM3	MACS_peak_421 (-247133)
CHRNA1	MACS_peak_2050 (-69093)
CHRNA3	MACS_peak_1408 (-12294)
CHRNA4	MACS_peak_2210 (+59566)
CHRNA6	MACS_peak_3660 (-71644)
CHRNB4	MACS_peak_1410 (-80688), MACS_peak_1408 (+7772)
CHST13	MACS_peak_2473 (+65653)
CHSY3	MACS_peak_2991 (-146948)
CIB4	MACS_peak_1828 (-19213)
CKMT2	MACS_peak_2920 (-202528)
CLASP2	MACS_peak_2336 (+194577)
CLCA4	MACS_peak_149 (+59186)
CLCN3	MACS_peak_2808 (-867)
CLCN5	MACS_peak_3968 (+100984)
CLDN10	MACS_peak_1199 (-50961)
CLDN5	MACS_peak_2246 (-155915), MACS_peak_2245 (-121716)
CLEC14A	MACS_peak_1242 (-10549)
CLEC4D	MACS_peak_828 (+12078)
CLEC4E	MACS_peak_828 (+15345)
CLIC6	MACS_peak_2230 (-7330)
CLIP1	MACS_peak_970 (-110480)
CLK4	MACS_peak_3059 (+31172)
CLN5	MACS_peak_1127 (-29056)
CLN6	MACS_peak_1380 (-9494)
CLVS1	MACS_peak_3676 (-93720), MACS_peak_3677 (-64841)
CLYBL	MACS_peak_1206 (+113322)
CMTM7	MACS_peak_2332 (-137309)
CMTM8	MACS_peak_2332 (+15683)
CMTR1	MACS_peak_3133 (+34693)
CNIH3	MACS_peak_376 (-158731), MACS_peak_377 (-139371)
CNKSR2	MACS_peak_3942 (-246530)
CNNM1	MACS_peak_604 (+84967)
CNNM2	MACS_peak_607 (-30060)
CNOT1	MACS_peak_1527 (+111409)
CNOT10	MACS_peak_2334 (-75946)
CNTN1	MACS_peak_869 (+191571)
CNTN3	MACS_peak_2406 (+66599)
COCH	MACS_peak_1227 (-185761)
COL11A1	MACS_peak_179 (+263436)
COL18A1	MACS_peak_2241 (+63899)
COL19A1	MACS_peak_3166 (+145732)
COL20A1	MACS_peak_2210 (+8635)
COL23A1	MACS_peak_3059 (-5387)
COL25A1	MACS_peak_2703 (+199756)
COL8A1	MACS_peak_2433 (-149663)
COL9A1	MACS_peak_3166 (+290591)
COLGALT1	MACS_peak_1769 (+66496)
COMMD9	MACS_peak_710 (+5605)
COMP	MACS_peak_1770 (-35982)
CORO2B	MACS_peak_1383 (-48312)
CORO6	MACS_peak_1583 (-274348), MACS_peak_1582 (-175837)
COX6C	MACS_peak_3744 (+12265), MACS_peak_3743 (+65521)
COX8C	MACS_peak_1313 (+76668)
CPD	MACS_peak_1585 (+31909)
CPEB4	MACS_peak_3048 (+122014)
CPLX2	MACS_peak_3053 (-93986)
CRAMP1L	MACS_peak_1475 (+3648)
CREBBP	MACS_peak_1478 (-181781)
CREM	MACS_peak_499 (+128722)
CRHR1	MACS_peak_1598 (-218826)
CRIPAK	MACS_peak_2556 (+346)
CRISPLD1	MACS_peak_3703 (+73464)
CRNKL1	MACS_peak_2167 (-89469)
CROT	MACS_peak_3524 (-39217)
CRYGD	MACS_peak_2105 (+43568)
CSF2	MACS_peak_2996 (+53558)
CSMD3	MACS_peak_3754 (+297329)
CSNK2A1	MACS_peak_2146 (+23574)
CSPG5	MACS_peak_2359 (-175979)
CSPP1	MACS_peak_3686 (+248734)
CSRP2BP	MACS_peak_2164 (+80705)
CSTL1	MACS_peak_2170 (-11537)
CTAGE5	MACS_peak_1243 (+145386)
CTDSPL	MACS_peak_2340 (-227922)
CTDSPL2	MACS_peak_1352 (+43476)
CTNNA3	MACS_peak_532 (+58119)
CTNNB1	MACS_peak_2345 (+54319)
CTNND2	MACS_peak_2839 (-9398)
CTSL	MACS_peak_3845 (-207471)
CTSV	MACS_peak_3872 (-187996), MACS_peak_3871 (-80839)
CUBN	MACS_peak_471 (+76612)
CUL1	MACS_peak_3617 (-205811), MACS_peak_3618 (+45285)
CUL3	MACS_peak_2129 (+98024)
CXCR2	MACS_peak_2120 (-19472)
CXorf36	MACS_peak_3962 (+253830)
CXorf57	MACS_peak_4047 (-58467)
CXorf66	MACS_peak_4114 (-11300)
CXXC1	MACS_peak_1742 (-81307)
CXXC4	MACS_peak_2696 (+155352), MACS_peak_2695 (+169499)
CYB561	MACS_peak_1618 (+103047)
CYBRD1	MACS_peak_2041 (+147996)
CYCS	MACS_peak_3443 (+38220), MACS_peak_3442 (+79467)
CYFIP1	MACS_peak_1337 (+10711)
CYP1B1	MACS_peak_1850 (+13460)
CYP26A1	MACS_peak_592 (+30220)
CYP26B1	MACS_peak_1895 (+98918)
CYP26C1	MACS_peak_590 (-180885), MACS_peak_591 (-140256)
CYP27C1	MACS_peak_1980 (-11018), MACS_peak_1979 (-4763)
CYP2C19	MACS_peak_595 (+39971)
CYP2C8	MACS_peak_597 (+88684)
CYP2C9	MACS_peak_595 (-136076), MACS_peak_597 (+42142)
CYP2J2	MACS_peak_68 (+1895), MACS_peak_67 (+73272)
CYP4A11	MACS_peak_39 (+62962)
CYP4A22	MACS_peak_42 (-48278)
CYP4B1	MACS_peak_39 (+79457)
CYP4Z1	MACS_peak_42 (+21689)
CYR61	MACS_peak_146 (-60914)
CYTIP	MACS_peak_2019 (-170854)
DAB1	MACS_peak_62 (-260743)
DACH1	MACS_peak_1103 (+245782)
DACH2	MACS_peak_4018 (-98683)
DAPK1	MACS_peak_3845 (+20167)
DAPK2	MACS_peak_1368 (+76839)
DBI	MACS_peak_1972 (-94682)
DCAF12L1	MACS_peak_4090 (+141428)
DCAF16	MACS_peak_2572 (+110527)
DCDC1	MACS_peak_699 (+142066)
DCLRE1C	MACS_peak_466 (+46274)
DCTPP1	MACS_peak_1503 (-266)
DCUN1D5	MACS_peak_777 (+55915)
DCX	MACS_peak_4056 (-120312)
DDAH1	MACS_peak_146 (-54707)
DDHD1	MACS_peak_1263 (-272818), MACS_peak_1262 (+12357)
DDX53	MACS_peak_3944 (+240630)
DDX58	MACS_peak_3804 (+120076)
DEK	MACS_peak_3101 (-92893)
DENND3	MACS_peak_3775 (-77310)
DENND4A	MACS_peak_1371 (-19955)
DENND5B	MACS_peak_865 (+53452)
DEPDC7	MACS_peak_705 (-23712)
DESI2	MACS_peak_439 (-105032), MACS_peak_440 (-96465), MACS_peak_442 (-20191)
DET1	MACS_peak_1442 (-51069)
DHRS3	MACS_peak_8 (+229769)
DHX15	MACS_peak_2584 (+153812)
DIP2C	MACS_peak_446 (-63457)
DIRAS3	MACS_peak_93 (-165653), MACS_peak_91 (-40007)
DIS3L2	MACS_peak_2133 (+191567)
DISC1	MACS_peak_399 (-85761)
DISP1	MACS_peak_372 (-159112), MACS_peak_373 (-147089)
DLEU1	MACS_peak_1031 (+216130)
DLL1	MACS_peak_3392 (+88979)
DLX2	MACS_peak_2042 (-24698)
DMRTA2	MACS_peak_46 (+152614)
DMRTB1	MACS_peak_54 (+149715)
DMXL2	MACS_peak_1356 (+201409)
DNAJB12	MACS_peak_545 (-183658)
DNAJB8	MACS_peak_2479 (+119312)
DNAJC10	MACS_peak_2069 (-185016)
DNAJC19	MACS_peak_2546 (-12676)
DNAJC3	MACS_peak_1200 (-4873)
DNAJC5B	MACS_peak_3683 (-105890)
DNASE2B	MACS_peak_142 (-165629)
DNER	MACS_peak_2132 (-57260)
DNM3	MACS_peak_282 (+168633)
DNTT	MACS_peak_598 (+42072)
DNTTIP2	MACS_peak_167 (+21318)
DPF3	MACS_peak_1297 (+133322)
DPY19L1	MACS_peak_3463 (-35460)
DR1	MACS_peak_165 (-60889)
DRD2	MACS_peak_785 (-191380)
DSG3	MACS_peak_1693 (-23099)
DSG4	MACS_peak_1693 (+47813)
DTD1	MACS_peak_2165 (+15064)
DTNA	MACS_peak_1708 (-89814), MACS_peak_1709 (-14511), MACS_peak_1711 (+114517)
DTNB	MACS_peak_1827 (-158916)
DUSP5	MACS_peak_617 (-48552)
DYDC2	MACS_peak_560 (-38574), MACS_peak_561 (-26999)
DYNC1I2	MACS_peak_2041 (-17126)
DYNC1LI1	MACS_peak_2334 (-48729)
DYRK1A	MACS_peak_2237 (+21062)
DZIP1	MACS_peak_1200 (-29003)
EBF3	MACS_peak_656 (-19248), MACS_peak_655 (+17961)
EBNA1BP2	MACS_peak_34 (+54124)
ECI2	MACS_peak_3078 (-15845)
EDA2R	MACS_peak_3979 (-280850)
EDARADD	MACS_peak_410 (-70257)
EDNRB	MACS_peak_1134 (-201913), MACS_peak_1133 (-40803), MACS_peak_1132 (+209646)
EEPD1	MACS_peak_3464 (+103665)
EFCAB4B	MACS_peak_821 (-112775), MACS_peak_819 (+226119)
EFCAB6	MACS_peak_2285 (+54050), MACS_peak_2284 (+107411)
EGF	MACS_peak_2706 (+65297)
EGFR	MACS_peak_3485 (-46029)
EID3	MACS_peak_948 (-15368)
EIF2AK2	MACS_peak_1845 (-2911)
EIF3C	MACS_peak_1501 (+6891)
EIF3CL	MACS_peak_1500 (+6852)
EIF3J	MACS_peak_1352 (-66347)
ELAC2	MACS_peak_1562 (+129151)
ELAVL2	MACS_peak_3798 (-78)
ELAVL4	MACS_peak_46 (+164594)
ELF1	MACS_peak_1015 (-26925), MACS_peak_1014 (+156765)
ELFN1	MACS_peak_3398 (-3703), MACS_peak_3399 (+107077), MACS_peak_3400 (+189407), MACS_peak_3401 (+237080)
ELK3	MACS_peak_943 (+123620)
ELL2	MACS_peak_2947 (+114843)
ELMOD1	MACS_peak_778 (+102812)
ELN	MACS_peak_3506 (-88044)
ELOVL4	MACS_peak_3182 (+872)
ELOVL6	MACS_peak_2708 (-213617), MACS_peak_2706 (+220465)
ELP4	MACS_peak_700 (+66236)
EMB	MACS_peak_2858 (-27989)
EMC1	MACS_peak_12 (-23618)
EMR1	MACS_peak_1759 (+142228)
EN1	MACS_peak_1970 (-52069), MACS_peak_1969 (-157)
ENAH	MACS_peak_380 (+5613)
ENOX1	MACS_peak_1017 (-58045)
ENPEP	MACS_peak_2708 (-63803)
ENSG00000091436	MACS_peak_2043 (-221419), MACS_peak_2044 (+66861), MACS_peak_2045 (+256127), MACS_peak_2046 (+277806)
ENSG00000143674	MACS_peak_402 (-21993)
ENSG00000148123	MACS_peak_3878 (+77405)
ENSG00000170091	MACS_peak_3048 (-35310)
ENSG00000228144	MACS_peak_909 (+28474)
ENSG00000257184	MACS_peak_3447 (+1341)
ENSG00000273217	MACS_peak_2994 (+28802)
ENSG00000273291	MACS_peak_2351 (-3592)
EPAS1	MACS_peak_1861 (+119078)
EPB41L4A	MACS_peak_2960 (+241296)
EPB41L5	MACS_peak_1974 (-222363), MACS_peak_1975 (+36669)
EPC1	MACS_peak_496 (-13143)
EPCAM	MACS_peak_1862 (-46089)
EPHA4	MACS_peak_2123 (+191665)
EPHB3	MACS_peak_2549 (+92270)
EPM2A	MACS_peak_3322 (+260009)
EPS15L1	MACS_peak_1768 (+81899)
EQTN	MACS_peak_3801 (+55671)
ERBB2IP	MACS_peak_2891 (+162874)
ERBB4	MACS_peak_2110 (-45516)
ERCC3	MACS_peak_1980 (+77391), MACS_peak_1979 (+83646)
ERH	MACS_peak_1292 (+23229)
ERO1LB	MACS_peak_410 (-42036)
ESM1	MACS_peak_2867 (+140172)
ESR2	MACS_peak_1284 (-18067)
ESRP1	MACS_peak_3734 (-87012)
ESRRB	MACS_peak_1302 (+114186)
ESYT2	MACS_peak_3635 (+16530)
ETV1	MACS_peak_3419 (+69895)
ETV6	MACS_peak_835 (+257986)
EVI5	MACS_peak_162 (+64692)
EXOC1	MACS_peak_2605 (-215538)
EXOC4	MACS_peak_3587 (+99543), MACS_peak_3588 (+125861)
EXOC6	MACS_peak_590 (+31859), MACS_peak_591 (+72488)
EXOC6B	MACS_peak_1898 (+16712), MACS_peak_1896 (+105718)
EXT2	MACS_peak_716 (+156985)
EYA1	MACS_peak_3696 (+286617)
EYA4	MACS_peak_3288 (-27752), MACS_peak_3290 (+203551), MACS_peak_3291 (+248964)
EZH2	MACS_peak_3618 (+140081)
F9	MACS_peak_4112 (-92840)
FABP12	MACS_peak_3712 (-106018)
FAF1	MACS_peak_49 (+29146)
FAHD2B	MACS_peak_1927 (+119037), MACS_peak_1926 (+120319)
FAM101A	MACS_peak_971 (+183689)
FAM109A	MACS_peak_954 (+20726)
FAM120B	MACS_peak_3393 (+210154)
FAM124A	MACS_peak_1033 (-298230), MACS_peak_1034 (-117714)
FAM124B	MACS_peak_2129 (-85290)
FAM126B	MACS_peak_2094 (+37122)
FAM127A	MACS_peak_4104 (-2335)
FAM127C	MACS_peak_4104 (-7439)
FAM129A	MACS_peak_309 (-7731)
FAM133B	MACS_peak_3535 (-114633)
FAM135A	MACS_peak_3167 (+26358)
FAM151B	MACS_peak_2918 (-58343), MACS_peak_2919 (-3912)
FAM162B	MACS_peak_3244 (-53167)
FAM186B	MACS_peak_888 (+12647)
FAM19A1	MACS_peak_2398 (-281990)
FAM20A	MACS_peak_1632 (-7301)
FAM20C	MACS_peak_3395 (+155168), MACS_peak_3396 (+240235), MACS_peak_3397 (+265200)
FAM47E	MACS_peak_2639 (+49585)
FAM47E-STBD1	MACS_peak_2639 (-4700)
FAM53A	MACS_peak_2557 (+92960)
FAM60A	MACS_peak_865 (-211273)
FAM65B	MACS_peak_3109 (-249326)
FAM71B	MACS_peak_3030 (+10831)
FAM71F2	MACS_peak_3583 (-116603)
FAM83H	MACS_peak_3778 (-16777)
FAM92A1	MACS_peak_3727 (-11955), MACS_peak_3729 (+25755), MACS_peak_3730 (+26489)
FANCL	MACS_peak_1874 (+217194)
FAR2	MACS_peak_863 (-90999)
FBN2	MACS_peak_2986 (+150958)
FBXO11	MACS_peak_1863 (-52654)
FBXO3	MACS_peak_707 (-20607)
FBXO33	MACS_peak_1243 (+19990)
FBXO43	MACS_peak_3745 (+34646)
FBXW12	MACS_peak_2360 (-10041)
FCGR1A	MACS_peak_234 (-23669)
FCHO2	MACS_peak_2899 (+89892)
FEM1B	MACS_peak_1380 (-38567), MACS_peak_1381 (+1523), MACS_peak_1382 (+120287)
FERMT2	MACS_peak_1262 (-189644)
FGD5	MACS_peak_2316 (-39689)
FGF1	MACS_peak_3017 (+1299)
FGF13	MACS_peak_4112 (-233808)
FGF16	MACS_peak_4002 (-103574), MACS_peak_4003 (+85770), MACS_peak_4004 (+113152)
FGF23	MACS_peak_822 (+13798)
FGF3	MACS_peak_733 (-256704)
FGFR2	MACS_peak_641 (+53445)
FGGY	MACS_peak_64 (+152970)
FHIT	MACS_peak_2390 (-143988)
FHL1	MACS_peak_4108 (-118630)
FLT3	MACS_peak_994 (-30227)
FLVCR1	MACS_peak_353 (+44048)
FMN1	MACS_peak_1342 (+246712)
FMN2	MACS_peak_425 (+284459)
FMO4	MACS_peak_278 (+61441), MACS_peak_279 (+87005)
FNDC3A	MACS_peak_1028 (+15223)
FNDC5	MACS_peak_25 (+24484)
FNIP2	MACS_peak_2796 (+160144)
FOLR4	MACS_peak_763 (-69304), MACS_peak_764 (-55255)
FOSL2	MACS_peak_1832 (-215170)
FOXA1	MACS_peak_1240 (-36020)
FOXC1	MACS_peak_3073 (+199315)
FOXD1	MACS_peak_2901 (+117654)
FOXD2	MACS_peak_43 (+163942)
FOXF1	MACS_peak_1550 (-246310)
FOXJ2	MACS_peak_826 (+13481)
FRAS1	MACS_peak_2642 (+50283)
FRK	MACS_peak_3241 (+17933)
FRMD4A	MACS_peak_465 (+267548)
FSIP2	MACS_peak_2072 (+12951)
FYN	MACS_peak_3231 (-59589)
FZD1	MACS_peak_3532 (+193535)
FZD7	MACS_peak_2095 (-20407)
G2E3	MACS_peak_1226 (-13532)
GAB2	MACS_peak_745 (-92359), MACS_peak_744 (+157065)
GABARAPL1	MACS_peak_829 (+43501)
GALM	MACS_peak_1851 (+36708)
GALNT1	MACS_peak_1719 (+103034), MACS_peak_1720 (+298287)
GALNT10	MACS_peak_3027 (+232666)
GALNT11	MACS_peak_3625 (-27551), MACS_peak_3627 (+225392)
GALNT13	MACS_peak_2015 (+195424)
GALNT16	MACS_peak_1292 (+115434)
GALNT2	MACS_peak_390 (-224094)
GALNTL5	MACS_peak_3625 (+90352)
GAP43	MACS_peak_2463 (+112725)
GAS6	MACS_peak_1212 (-47570)
GATA2	MACS_peak_2481 (-50585), MACS_peak_2480 (-38140)
GATAD1	MACS_peak_3534 (-111669)
GBE1	MACS_peak_2411 (-118100)
GBP5	MACS_peak_153 (-54451)
GBP6	MACS_peak_153 (-36622), MACS_peak_154 (+29193)
GCC2	MACS_peak_1955 (+71302)
GCNT4	MACS_peak_2902 (-269333)
GCSAM	MACS_peak_2456 (-132507)
GDA	MACS_peak_3826 (+143279)
GDAP1	MACS_peak_3702 (+256612)
GDF6	MACS_peak_3736 (+99375)
GDPD2	MACS_peak_3984 (-28485)
GFI1	MACS_peak_162 (-243758)
GFI1B	MACS_peak_3915 (+65488)
GFM1	MACS_peak_2524 (-7764)
GGCT	MACS_peak_3457 (+13208)
GGTLC1	MACS_peak_2171 (-183436)
GGTLC2	MACS_peak_2252 (+184505), MACS_peak_2253 (+200457)
GIPC2	MACS_peak_126 (+159806)
GIT2	MACS_peak_953 (+20664)
GJA1	MACS_peak_3261 (+266382)
GJA3	MACS_peak_984 (+145045)
GKAP1	MACS_peak_3840 (+83788)
GLCE	MACS_peak_1386 (-14740), MACS_peak_1387 (+69245)
GLDN	MACS_peak_1356 (+79597)
GLIS1	MACS_peak_54 (+125090)
GLRA1	MACS_peak_3022 (-154095)
GLRX	MACS_peak_2947 (-24514)
GLRX3	MACS_peak_656 (-153310)
GLS	MACS_peak_2080 (-215998), MACS_peak_2081 (+42575)
GLYATL3	MACS_peak_3150 (-26212)
GMDS	MACS_peak_3074 (+223521)
GNA11	MACS_peak_1755 (+34236)
GNA13	MACS_peak_1622 (+26208), MACS_peak_1621 (+26797)
GNA15	MACS_peak_1755 (-7547)
GNAO1	MACS_peak_1522 (-10364)
GNAS	MACS_peak_2207 (-120945)
GNAZ	MACS_peak_2254 (-103159)
GNB5	MACS_peak_1357 (+25491)
GNG13	MACS_peak_1474 (-140772)
GNL3L	MACS_peak_3974 (+40279)
GNRH2	MACS_peak_2153 (-106731)
GOLIM4	MACS_peak_2530 (+24409)
GORASP2	MACS_peak_2040 (+215291)
GOSR1	MACS_peak_1585 (-66548)
GOT1	MACS_peak_604 (+16527)
GOT1L1	MACS_peak_3654 (+18543)
GPATCH8	MACS_peak_1597 (+37983)
GPBP1	MACS_peak_2873 (+261486)
GPC6	MACS_peak_1191 (+5202), MACS_peak_1193 (+142372), MACS_peak_1194 (+267709)
GPHN	MACS_peak_1287 (-68722)
GPNMB	MACS_peak_3434 (+5591)
GPR110	MACS_peak_3143 (-92715)
GPR114	MACS_peak_1525 (+55895)
GPR12	MACS_peak_993 (-168051), MACS_peak_992 (+134254)
GPR126	MACS_peak_3313 (-144137), MACS_peak_3314 (-143237)
GPR128	MACS_peak_2436 (-63828)
GPR133	MACS_peak_977 (-41802)
GPR143	MACS_peak_3925 (+54842)
GPR151	MACS_peak_3020 (-95329)
GPR155	MACS_peak_2049 (+78551)
GPR17	MACS_peak_1981 (-43916)
GPR176	MACS_peak_1347 (+109594)
GPR25	MACS_peak_339 (-72290)
GPR45	MACS_peak_1947 (-189438), MACS_peak_1948 (-189041), MACS_peak_1949 (-186713), MACS_peak_1950 (-83544)
GPR50	MACS_peak_4124 (+155644)
GPR52	MACS_peak_291 (-287547), MACS_peak_292 (-185113), MACS_peak_294 (-35697)
GPR56	MACS_peak_1525 (-29923)
GPR88	MACS_peak_176 (+64057)
GPR98	MACS_peak_2937 (+107794)
GPRC6A	MACS_peak_3244 (+10145)
GPX6	MACS_peak_3118 (+47542)
GRAMD1C	MACS_peak_2462 (+44877)
GRAP2	MACS_peak_2279 (-228923)
GRB2	MACS_peak_1639 (-21090)
GREB1L	MACS_peak_1669 (-228256), MACS_peak_1670 (-213096)
GREM1	MACS_peak_1342 (+103198)
GREM2	MACS_peak_425 (+235810)
GRHL1	MACS_peak_1813 (-63982)
GRID1	MACS_peak_571 (-66619), MACS_peak_569 (+88553)
GRIK3	MACS_peak_29 (-187429)
GRIK4	MACS_peak_790 (-118436), MACS_peak_791 (-110872)
GRIN2A	MACS_peak_1484 (-107892)
GRIN2B	MACS_peak_839 (+41881), MACS_peak_838 (+154214)
GRXCR1	MACS_peak_2595 (-123498)
GSDMC	MACS_peak_3766 (+70731)
GTF3C3	MACS_peak_2088 (+114700)
GTF3C5	MACS_peak_3915 (-19965)
GTF3C6	MACS_peak_3228 (-52048)
GUSB	MACS_peak_3494 (+48640)
GYPA	MACS_peak_2767 (-249057)
H2AFB1	MACS_peak_4129 (-16233)
HACE1	MACS_peak_3218 (+104958), MACS_peak_3217 (+186655)
HAND2	MACS_peak_2814 (-105334)
HAPLN4	MACS_peak_1771 (+28431)
HBP1	MACS_peak_3560 (-71483)
HCN4	MACS_peak_1401 (+256916)
HDAC4	MACS_peak_2140 (-13534)
HDDC2	MACS_peak_3265 (+19220)
HDX	MACS_peak_4015 (+123633)
HEATR1	MACS_peak_411 (-433)
HECTD2	MACS_peak_587 (+43125)
HELT	MACS_peak_2825 (+21153)
HELZ	MACS_peak_1628 (+128833)
HENMT1	MACS_peak_188 (+170323)
HEPH	MACS_peak_3978 (+22113)
HERC1	MACS_peak_1368 (-129540)
HEXA	MACS_peak_1398 (+52487)
HEY1	MACS_peak_3709 (-216561), MACS_peak_3707 (+23976)
HFE2	MACS_peak_220 (+23895)
HHIP	MACS_peak_2767 (-256212)
HIAT1	MACS_peak_175 (+48433)
HIF1AN	MACS_peak_606 (+53829)
HIP1	MACS_peak_3509 (+110859), MACS_peak_3508 (+148395)
HIPK2	MACS_peak_3599 (-49619)
HIST1H2AL	MACS_peak_3116 (-25275)
HIST1H2BN	MACS_peak_3116 (+1319)
HIST2H3PS2	MACS_peak_233 (+55107)
HIVEP2	MACS_peak_3315 (+58229)
HJURP	MACS_peak_2134 (+47921)
HLCS	MACS_peak_2233 (-758)
HLX	MACS_peak_368 (-11737)
HMGA2	MACS_peak_908 (-10452)
HMGB1	MACS_peak_999 (+1420)
HMGN3	MACS_peak_3181 (-262949), MACS_peak_3180 (-114228)
HMGXB4	MACS_peak_2275 (-68365)
HN1L	MACS_peak_1475 (-62283)
HNRNPC	MACS_peak_1216 (+5788)
HNRNPD	MACS_peak_2647 (+72445)
HOMER1	MACS_peak_2915 (+29825), MACS_peak_2914 (+174538)
HOMEZ	MACS_peak_1220 (+18188)
HOOK1	MACS_peak_67 (+38657), MACS_peak_68 (+110034)
HOPX	MACS_peak_2607 (+103133)
HOXA10	MACS_peak_3447 (-4366)
HPS1	MACS_peak_601 (-241007)
HRASLS5	MACS_peak_730 (+15607)
HRH2	MACS_peak_3053 (+44294)
HRSP12	MACS_peak_3740 (+31795)
HSPA4	MACS_peak_3003 (+132720), MACS_peak_3004 (+161837)
HSPB1	MACS_peak_3510 (-180779)
HYDIN	MACS_peak_1533 (+260356)
HYLS1	MACS_peak_798 (-27509)
IER5	MACS_peak_305 (+195309)
IFIT5	MACS_peak_583 (+32175)
IFNAR1	MACS_peak_2227 (-45348)
IFNG	MACS_peak_911 (+29653)
IGDCC3	MACS_peak_1369 (+73031)
IGF1	MACS_peak_947 (+178858)
IGF2BP3	MACS_peak_3435 (-4403)
IGFL3	MACS_peak_1798 (+78193)
IGFL4	MACS_peak_1798 (-5464)
IGLL1	MACS_peak_2255 (+151470)
IGLL5	MACS_peak_2252 (-56639), MACS_peak_2253 (-40687), MACS_peak_2254 (+79421)
IGSF1	MACS_peak_4098 (+133202)
IL10RB	MACS_peak_2227 (+13198)
IL15RA	MACS_peak_454 (-53587)
IL16	MACS_peak_1413 (-111708)
IL17REL	MACS_peak_2301 (-7157)
IL2	MACS_peak_2734 (-38320)
IL21	MACS_peak_2734 (+126024)
IL22	MACS_peak_912 (-46767)
IL2RA	MACS_peak_454 (+31148)
IL2RB	MACS_peak_2277 (-36685)
IL31RA	MACS_peak_2871 (+25406), MACS_peak_2872 (+135019)
IL6	MACS_peak_3432 (-201917)
IL6ST	MACS_peak_2872 (+8468), MACS_peak_2871 (+118081)
IMPA1	MACS_peak_3712 (+48887)
IMPG2	MACS_peak_2438 (+210016), MACS_peak_2437 (+261052)
INF2	MACS_peak_1329 (-73185)
ING1	MACS_peak_1208 (+36373)
ING2	MACS_peak_2821 (+92401)
INO80D	MACS_peak_2101 (+247751)
INPP5A	MACS_peak_659 (+155523)
INSM1	MACS_peak_2167 (-222606)
INSM2	MACS_peak_1235 (+64709)
INTS12	MACS_peak_2698 (-24543)
INVS	MACS_peak_3875 (+23577)
IQCF2	MACS_peak_2366 (+8534)
IQCF3	MACS_peak_2365 (-9573)
IQCF5	MACS_peak_2366 (+5412)
IQCF6	MACS_peak_2365 (-29038)
IQCH	MACS_peak_1377 (+89999)
IQUB	MACS_peak_3579 (+42864), MACS_peak_3578 (+83716)
IRF8	MACS_peak_1549 (+125560)
IRG1	MACS_peak_1127 (+13107)
IRS4	MACS_peak_4053 (-144453)
IRX5	MACS_peak_1520 (+90198)
ISOC1	MACS_peak_2990 (-37290)
ISX	MACS_peak_2275 (+122997)
ITGA1	MACS_peak_2862 (-280992)
ITGA11	MACS_peak_1383 (-98769), MACS_peak_1382 (+34064), MACS_peak_1381 (+152828)
ITGA2B	MACS_peak_1597 (-75913)
ITGA9	MACS_peak_2340 (+182133)
ITGB3	MACS_peak_1601 (-1671)
ITGB3BP	MACS_peak_78 (+7873), MACS_peak_77 (+81246)
ITIH6	MACS_peak_3974 (+227750)
ITLN1	MACS_peak_253 (-9325)
ITLN2	MACS_peak_253 (+60304)
IVNS1ABP	MACS_peak_312 (+56010), MACS_peak_311 (+118365)
IZUMO3	MACS_peak_3799 (-32635)
JADE1	MACS_peak_2743 (-182622), MACS_peak_2744 (+54073), MACS_peak_2745 (+244156)
JAKMIP3	MACS_peak_657 (-32102)
JAZF1	MACS_peak_3451 (+121391)
JMY	MACS_peak_2914 (+103490), MACS_peak_2915 (+248203)
KALRN	MACS_peak_2471 (+283286)
KANSL1	MACS_peak_1599 (+109887)
KAT6A	MACS_peak_3659 (-7647), MACS_peak_3658 (-2805)
KAT6B	MACS_peak_550 (-33420)
KBTBD12	MACS_peak_2477 (-87294)
KBTBD2	MACS_peak_3459 (+199948)
KCNH5	MACS_peak_1282 (-75272)
KCNJ12	MACS_peak_1574 (+181420)
KCNJ2	MACS_peak_1636 (+291461)
KCNK13	MACS_peak_1308 (-5895)
KCNK16	MACS_peak_3136 (-134074)
KCNK3	MACS_peak_1828 (-32170)
KCNMB2	MACS_peak_2544 (-195420)
KCNQ5	MACS_peak_3176 (-49603)
KCNS2	MACS_peak_3741 (+186740)
KCTD1	MACS_peak_1684 (+106044)
KCTD12	MACS_peak_1126 (+269507)
KCTD15	MACS_peak_1783 (+184615)
KCTD3	MACS_peak_357 (-23375)
KCTD5	MACS_peak_1476 (-332)
KDM3A	MACS_peak_1911 (-839)
KDM5A	MACS_peak_813 (+14925)
KDM6A	MACS_peak_3962 (+73559)
KDM7A	MACS_peak_3600 (+108844)
KDR	MACS_peak_2603 (+102317)
KERA	MACS_peak_934 (-37846)
KIAA0195	MACS_peak_1639 (-29888)
KIAA0226	MACS_peak_2555 (+13685)
KIAA0247	MACS_peak_1293 (-171984)
KIAA0922	MACS_peak_2789 (-93184)
KIAA1024	MACS_peak_1411 (+13378)
KIAA1024L	MACS_peak_2991 (+9445)
KIAA1191	MACS_peak_3055 (+110986)
KIAA1429	MACS_peak_3734 (-594)
KIAA1456	MACS_peak_3642 (+206153)
KIAA1549	MACS_peak_3598 (+123338)
KIAA1644	MACS_peak_2288 (-102993), MACS_peak_2287 (+103054)
KIAA1919	MACS_peak_3229 (+15217)
KIAA2018	MACS_peak_2460 (+51287)
KIF1A	MACS_peak_2142 (-3152)
KIF1B	MACS_peak_5 (+183670)
KIF26A	MACS_peak_1326 (-14629)
KIF2C	MACS_peak_35 (-8873)
KIF4A	MACS_peak_3984 (+104456)
KIF6	MACS_peak_3136 (+268791)
KLF2	MACS_peak_1768 (+65296)
KLF4	MACS_peak_3884 (+5260), MACS_peak_3883 (+174671)
KLF5	MACS_peak_1108 (-195977), MACS_peak_1111 (+29794)
KLHDC2	MACS_peak_1253 (+49527)
KLHL1	MACS_peak_1096 (-233508), MACS_peak_1095 (-232349)
KLHL14	MACS_peak_1702 (-214090), MACS_peak_1701 (-87569)
KLHL20	MACS_peak_287 (+98912)
KLHL25	MACS_peak_1433 (-51460)
KLHL29	MACS_peak_1823 (-129673)
KLRD1	MACS_peak_829 (-51512), MACS_peak_830 (+53296)
KLRK1	MACS_peak_830 (+28904)
KMT2C	MACS_peak_3627 (+136315)
KMT2E	MACS_peak_3554 (+19314)
KPNA2	MACS_peak_1630 (-194184)
KPNA3	MACS_peak_1030 (-60794)
KRBA1	MACS_peak_3621 (-173766)
KRR1	MACS_peak_920 (-9758)
KTN1	MACS_peak_1268 (+3280)
LACC1	MACS_peak_1017 (-34331)
LAMA2	MACS_peak_3275 (-22190)
LANCL2	MACS_peak_3486 (-8260)
LARGE	MACS_peak_2272 (-197696), MACS_peak_2270 (-79709)
LARP1B	MACS_peak_2742 (+154587)
LARP4B	MACS_peak_446 (+132639)
LBR	MACS_peak_380 (-218712)
LCA5	MACS_peak_3181 (+39792), MACS_peak_3180 (+188513)
LCA5L	MACS_peak_2239 (-1672)
LCLAT1	MACS_peak_1834 (+109270)
LCOR	MACS_peak_599 (+59879)
LCORL	MACS_peak_2574 (+167752)
LDOC1	MACS_peak_4115 (-42710)
LEPR	MACS_peak_81 (+113434), MACS_peak_82 (+244913)
LHFPL1	MACS_peak_4059 (-40591), MACS_peak_4058 (+98121)
LHFPL2	MACS_peak_2912 (-19498)
LHFPL4	MACS_peak_2309 (-11675)
LHX3	MACS_peak_3922 (+39704)
LIMS1	MACS_peak_1955 (-135174), MACS_peak_1957 (+42756)
LIMS3L	MACS_peak_1962 (-30619)
LIN28B	MACS_peak_3219 (+97114)
LLPH	MACS_peak_909 (-10743)
LMBRD1	MACS_peak_3165 (+74215)
LMF1	MACS_peak_1474 (+29494)
LMO2	MACS_peak_707 (+97167)
LMO3	MACS_peak_843 (+226004)
LMO7	MACS_peak_1123 (+293819)
LMX1A	MACS_peak_259 (+259884)
LMX1B	MACS_peak_3911 (+122019)
LPAR1	MACS_peak_3890 (+244918)
LPAR3	MACS_peak_144 (-111298)
LPAR6	MACS_peak_1025 (-22861)
LPHN2	MACS_peak_133 (-94099)
LRBA	MACS_peak_2784 (+126615)
LRGUK	MACS_peak_3590 (+186382)
LRIF1	MACS_peak_191 (-35725)
LRIG1	MACS_peak_2395 (+257415)
LRP11	MACS_peak_3336 (+31556)
LRRC16A	MACS_peak_3109 (-119135)
LRRC27	MACS_peak_658 (-17725)
LRRC28	MACS_peak_1464 (+61610)
LRRC32	MACS_peak_742 (+180005)
LRRC37A2	MACS_peak_1600 (-14222)
LRRC37A3	MACS_peak_1622 (-111846), MACS_peak_1621 (-111257), MACS_peak_1620 (+5892)
LRRC37B	MACS_peak_1588 (-7746)
LRRC3B	MACS_peak_2329 (-234085)
LRRC40	MACS_peak_102 (+1310)
LRRC4B	MACS_peak_1801 (+17896)
LRRC7	MACS_peak_99 (-73424)
LRRC8B	MACS_peak_154 (-131652)
LSM14A	MACS_peak_1783 (-189565)
LSM6	MACS_peak_2773 (+176360)
LSMEM1	MACS_peak_3565 (+246918)
LTBP1	MACS_peak_1839 (-30532)
LUM	MACS_peak_934 (+16002)
LYPD6	MACS_peak_2005 (+218451)
LYPLAL1	MACS_peak_362 (-238310), MACS_peak_363 (-217331)
LZTFL1	MACS_peak_2356 (+36648)
MAB21L2	MACS_peak_2782 (-131906)
MAF	MACS_peak_1545 (+142012)
MAFA	MACS_peak_3777 (-25953)
MAFB	MACS_peak_2189 (-288151)
MAGEA1	MACS_peak_4127 (-102782)
MAGEA8	MACS_peak_4120 (-105447)
MAGEA9	MACS_peak_4120 (+40894)
MAGEE1	MACS_peak_4000 (-100868)
MAGEF1	MACS_peak_2549 (+57994)
MALSU1	MACS_peak_3434 (-46912)
MAMLD1	MACS_peak_4121 (-185521), MACS_peak_4122 (+78735)
MAN1A1	MACS_peak_3254 (-265088)
MANBA	MACS_peak_2690 (-24784)
MANEA	MACS_peak_3209 (+10216)
MAP1LC3C	MACS_peak_428 (-151655)
MAP3K10	MACS_peak_1793 (-99948)
MAP3K15	MACS_peak_3940 (+95988)
MAP3K7	MACS_peak_3203 (-252992), MACS_peak_3201 (+218158)
MAP4K3	MACS_peak_1852 (-19509)
MAPK10	MACS_peak_2653 (-51829)
MAPK9	MACS_peak_3065 (+107838)
MAPKAPK5	MACS_peak_955 (+65318)
MAPRE2	MACS_peak_1716 (+68526)
MARCHF10	MACS_peak_2799 (-161323)
MARCHF4	MACS_peak_2118 (+42242)
MARCO	MACS_peak_1969 (-94331), MACS_peak_1970 (-42419), MACS_peak_1971 (+155716)
MARK1	MACS_peak_367 (+141828)
MAST4	MACS_peak_2894 (-49677)
MATN1	MACS_peak_23 (+138366)
MBD3L3	MACS_peak_1761 (-728)
MBD3L5	MACS_peak_1759 (-778)
MBL2	MACS_peak_517 (+59823)
MCOLN2	MACS_peak_144 (+19483)
MCRS1	MACS_peak_888 (-26553)
MCUR1	MACS_peak_3092 (-5259)
MDH2	MACS_peak_3510 (+73697)
MDM1	MACS_peak_912 (+31958)
ME3	MACS_peak_752 (-70992), MACS_peak_751 (-50318)
MED13L	MACS_peak_965 (+3222), MACS_peak_963 (+25119), MACS_peak_962 (+25892)
MED28	MACS_peak_2572 (+85600)
MED6	MACS_peak_1295 (+51332)
MED7	MACS_peak_3030 (-12249)
MED9	MACS_peak_1568 (-116917), MACS_peak_1569 (-116281)
MEF2A	MACS_peak_1464 (-252728)
MEMO1	MACS_peak_1836 (+238019)
MEP1B	MACS_peak_1698 (-39025)
MESDC1	MACS_peak_1413 (+112738)
MESP1	MACS_peak_1443 (+29454)
METAP2	MACS_peak_941 (+75557)
METTL2B	MACS_peak_3583 (+78960)
MGAT4A	MACS_peak_1929 (+32574)
MGAT5B	MACS_peak_1640 (+139161)
MGLL	MACS_peak_2477 (-5080)
MGMT	MACS_peak_654 (+15716)
MIA3	MACS_peak_371 (-7835)
MICU1	MACS_peak_545 (+87298)
MICU2	MACS_peak_986 (+133206)
MID1	MACS_peak_3926 (+4470)
MID2	MACS_peak_4052 (+164266)
MIER1	MACS_peak_88 (+111810)
MIPOL1	MACS_peak_1239 (-7963)
MIS18A	MACS_peak_2225 (+59967)
MKL2	MACS_peak_1489 (+58591)
MLF1	MACS_peak_2524 (+65254)
MLNR	MACS_peak_1028 (-229203)
MMADHC	MACS_peak_2005 (+38614)
MMD	MACS_peak_1604 (-130635)
MME	MACS_peak_2517 (-4280)
MMP10	MACS_peak_776 (+32977)
MMP13	MACS_peak_777 (-80566)
MMP17	MACS_peak_978 (-37282)
MMP24	MACS_peak_2185 (-25213)
MMP8	MACS_peak_776 (-22697)
MND1	MACS_peak_2788 (-119770), MACS_peak_2789 (+28516)
MNX1	MACS_peak_3633 (-93146)
MOS	MACS_peak_3669 (-13735)
MOSC1 or MARC1	MACS_peak_368 (+79861)
MOSPD1	MACS_peak_4103 (+195854)
MOXD1	MACS_peak_3285 (+116943)
MPDZ	MACS_peak_3785 (+74231)
MPLKIP	MACS_peak_3466 (+169157)
MPP7	MACS_peak_491 (-239744)
MPPED1	MACS_peak_2284 (+293544)
MRAP	MACS_peak_2226 (+36151)
MREG	MACS_peak_2115 (+192192)
MRP63	MACS_peak_985 (+276357)
MRPL33	MACS_peak_1829 (-21795), MACS_peak_1830 (+100596)
MRPL54	MACS_peak_1756 (-132)
MRPS18A	MACS_peak_3137 (-43021)
MRPS28	MACS_peak_3709 (+45853)
MRPS6	MACS_peak_2228 (-113625)
MRPS9	MACS_peak_1947 (+14321), MACS_peak_1948 (+14718), MACS_peak_1949 (+17046), MACS_peak_1950 (+120215)
MSI2	MACS_peak_1605 (-5097)
MSL3	MACS_peak_3928 (-48923)
MSTN	MACS_peak_2078 (-68164), MACS_peak_2076 (+144909)
MSX2	MACS_peak_3051 (-249696)
MT1HL1	MACS_peak_412 (+86754)
MTA3	MACS_peak_1854 (+165945)
MTDH	MACS_peak_3739 (-275796)
MTERFD2	MACS_peak_2144 (+97993)
MTHFD1	MACS_peak_1284 (-75923)
MTHFD1L	MACS_peak_3338 (+209630)
MTIF2	MACS_peak_1868 (-56916)
MTM1	MACS_peak_4122 (-126648)
MTMR11	MACS_peak_235 (-19152)
MTMR14	MACS_peak_2309 (-83985)
MTMR8	MACS_peak_3977 (+94877)
MTR	MACS_peak_412 (+122354)
MTRNR2L11	MACS_peak_416 (-216917)
MTUS1	MACS_peak_3644 (+197784)
MTUS2	MACS_peak_995 (-193263)
MTX2	MACS_peak_2052 (+109069)
MUC2	MACS_peak_662 (-29784)
MUC22	MACS_peak_3125 (+13054)
MUC6	MACS_peak_662 (-8385)
MUSK	MACS_peak_3890 (+124354)
MVB12B	MACS_peak_3908 (-146520)
MYB	MACS_peak_3293 (+179578)
MYCBP2	MACS_peak_1129 (-3652)
MYCN	MACS_peak_1817 (-39450)
MYL4	MACS_peak_1601 (+43113)
MYLK4	MACS_peak_3076 (-8748), MACS_peak_3075 (+176348)
MYO1B	MACS_peak_2082 (+78815)
MYO1D	MACS_peak_1589 (+228451)
MYO3A	MACS_peak_488 (-269981)
MYO3B	MACS_peak_2036 (-24860)
MYO7B	MACS_peak_1981 (+66145)
MYOD1	MACS_peak_689 (-100216)
MYOZ2	MACS_peak_2723 (-245464), MACS_peak_2725 (+64152)
MYRFL	MACS_peak_913 (-174303)
N4BP1	MACS_peak_1510 (-49913)
N4BP2	MACS_peak_2593 (+111447)
NAA15	MACS_peak_2757 (+136383)
NAB1	MACS_peak_2080 (+15596)
NACA2	MACS_peak_1615 (-179700), MACS_peak_1614 (-125347), MACS_peak_1613 (-108093)
NACC2	MACS_peak_3921 (-18315)
NAMPT	MACS_peak_3557 (-193848)
NAPB	MACS_peak_2170 (-6660)
NARS2	MACS_peak_745 (+64698)
NAV2	MACS_peak_691 (+68515)
NBPF12	MACS_peak_223 (+106149), MACS_peak_224 (+185738)
NBPF16	MACS_peak_231 (+197323), MACS_peak_232 (+199087)
NBPF24	MACS_peak_228 (-207270)
NBPF6	MACS_peak_188 (+115404)
NCAN	MACS_peak_1771 (+22392)
NCAPG	MACS_peak_2574 (+43206)
NCAPG2	MACS_peak_3635 (-108294)
NCK2	MACS_peak_1951 (+89660)
NCOR2	MACS_peak_971 (+22399)
NDST3	MACS_peak_2720 (+292139)
NDUFAF5	MACS_peak_2163 (+107705)
NEBL	MACS_peak_478 (-217209)
NEDD4	MACS_peak_1360 (-209350)
NEK1	MACS_peak_2808 (-7030)
NEMF	MACS_peak_1253 (+36068)
NEO1	MACS_peak_1401 (+60638)
NEURL1B	MACS_peak_3047 (-119765)
NEUROG1	MACS_peak_3008 (+16401)
NEUROG2	MACS_peak_2711 (+37601), MACS_peak_2710 (+41930)
NF1	MACS_peak_1587 (+146349)
NFIA	MACS_peak_70 (-231455), MACS_peak_71 (+57794)
NFIL3	MACS_peak_3851 (-97507)
NFKB1	MACS_peak_2688 (-122645), MACS_peak_2689 (-21250)
NFKBIB	MACS_peak_1789 (+1805)
NFKBIZ	MACS_peak_2441 (-56137), MACS_peak_2442 (+177896)
NFRKB	MACS_peak_807 (-104125), MACS_peak_806 (+47252)
NGF	MACS_peak_201 (+92756)
NHLH1	MACS_peak_248 (+21498)
NHS	MACS_peak_3936 (-211120)
NIN	MACS_peak_1256 (+7496)
NINJ1	MACS_peak_3857 (+33836)
NIPA2	MACS_peak_1337 (+131034)
NKD1	MACS_peak_1516 (-105521)
NKX1-1	MACS_peak_2557 (-192909), MACS_peak_2556 (+14433)
NKX6-1	MACS_peak_2649 (+73193)
NKX6-2	MACS_peak_659 (+92709)
NLRC4	MACS_peak_1837 (+28865)
NLRP1	MACS_peak_1557 (-141550)
NME7	MACS_peak_270 (+84719), MACS_peak_269 (+112425)
NMI	MACS_peak_2011 (-28146)
NMU	MACS_peak_2605 (-1779), MACS_peak_2604 (+15093)
NNMT	MACS_peak_786 (+44344)
NOD1	MACS_peak_3457 (-12856)
NOL4	MACS_peak_1708 (-279974), MACS_peak_1706 (+82905), MACS_peak_1704 (+115106)
NOTCH4	MACS_peak_3128 (-57688)
NOX3	MACS_peak_3348 (+109024), MACS_peak_3347 (+116624)
NOX5	MACS_peak_1384 (-59631), MACS_peak_1386 (+131199)
NPAS2	MACS_peak_1934 (+96084)
NPEPL1	MACS_peak_2207 (+39155)
NPIPB6	MACS_peak_1500 (-33484)
NPIPB9	MACS_peak_1501 (-33533)
NPNT	MACS_peak_2698 (-161790)
NPTX2	MACS_peak_3544 (-109501), MACS_peak_3545 (+21683)
NPY	MACS_peak_3439 (-25014)
NR3C1	MACS_peak_3018 (-64791)
NR3C2	MACS_peak_2779 (-180112)
NREP	MACS_peak_2960 (-201089)
NRG2	MACS_peak_3012 (+110238)
NRG3	MACS_peak_563 (-18761)
NRP1	MACS_peak_498 (+10732)
NRP2	MACS_peak_2101 (+155931)
NSRP1	MACS_peak_1584 (+31909)
NT5M	MACS_peak_1568 (+56734), MACS_peak_1569 (+57370)
NTPCR	MACS_peak_401 (+216580)
NUFIP1	MACS_peak_1020 (+27295)
NUS1	MACS_peak_3247 (+66927), MACS_peak_3250 (+156300)
NXF3	MACS_peak_4043 (-87695)
NXNL2	MACS_peak_3847 (+77077)
NXPE3	MACS_peak_2441 (+7977)
OAF	MACS_peak_789 (-52374)
OBFC1	MACS_peak_608 (-6608)
OFCC1	MACS_peak_3085 (-30716)
OGDHL	MACS_peak_514 (-125615)
OGN	MACS_peak_3853 (+30429)
OLFML2A	MACS_peak_3906 (+49341)
OMG	MACS_peak_1587 (+56135)
OPALIN	MACS_peak_598 (+12834)
OR1A2	MACS_peak_1553 (-51732)
OR1F1	MACS_peak_1477 (-67423)
OR1G1	MACS_peak_1553 (-18206)
OR2V1	MACS_peak_3069 (-11238)
OR2V2	MACS_peak_3069 (-18401)
OR4C12	MACS_peak_721 (-283242)
OR4K14	MACS_peak_1214 (+6200)
OR4K15	MACS_peak_1214 (+33549)
OR5AU1	MACS_peak_1216 (-107628)
OR5K1	MACS_peak_2432 (-70437)
OR5K3	MACS_peak_2432 (+8377)
ORC2	MACS_peak_2094 (-70867)
OSBPL3	MACS_peak_3443 (-106953), MACS_peak_3442 (-65706)
OSGIN2	MACS_peak_3718 (-143164)
OSR1	MACS_peak_1820 (-97386)
OTOG	MACS_peak_689 (+71979)
OTOL1	MACS_peak_2526 (+187387)
OTP	MACS_peak_2907 (-56919)
OTUD4	MACS_peak_2770 (-244597)
OTUD6B	MACS_peak_3720 (+125560)
OTUD7B	MACS_peak_236 (-19825), MACS_peak_235 (+54682)
OTX2	MACS_peak_1272 (-296525)
OXER1	MACS_peak_1854 (+29799)
OXGR1	MACS_peak_1202 (+12704)
PALLD	MACS_peak_2806 (+72166)
PALM2	MACS_peak_3888 (+57143)
PALM2-AKAP2	MACS_peak_3886 (-235199), MACS_peak_3887 (-116160)
PAN3	MACS_peak_994 (-7687)
PANX1	MACS_peak_763 (+107361), MACS_peak_764 (+121410)
PAPD5	MACS_peak_1515 (+50024)
PAQR5	MACS_peak_1387 (-84524)
PAQR9	MACS_peak_2501 (-13641)
PARG	MACS_peak_514 (+34731)
PARK2	MACS_peak_3373 (-54169), MACS_peak_3372 (-28783)
PARP11	MACS_peak_821 (+7497)
PARP12	MACS_peak_3600 (-4470)
PARP16	MACS_peak_1369 (-18137)
PARP8	MACS_peak_2858 (-197582)
PARVA	MACS_peak_681 (+235160)
PARVG	MACS_peak_2287 (+28907)
PATE4	MACS_peak_798 (+26235)
PAWR	MACS_peak_927 (-47105)
PAX2	MACS_peak_606 (-156023)
PAX6	MACS_peak_700 (+241976)
PAX9	MACS_peak_1238 (+119404)
PBDC1	MACS_peak_4000 (+154407)
PBLD	MACS_peak_536 (-40567)
PBX1	MACS_peak_258 (-98416)
PCCA	MACS_peak_1207 (+159117)
PCCB	MACS_peak_2488 (+232717)
PCDH11Y	MACS_peak_4132 (-103171)
PCDH9	MACS_peak_1078 (-224011), MACS_peak_1076 (-25967)
PCID2	MACS_peak_1210 (+40893)
PCLO	MACS_peak_3520 (+136728)
PCMT1	MACS_peak_3336 (+83027)
PCNXL2	MACS_peak_402 (-10062), MACS_peak_401 (+128509)
PCSK9	MACS_peak_56 (+144112)
PDCD2	MACS_peak_3394 (-7422)
PDCD4	MACS_peak_618 (+45297)
PDCL2	MACS_peak_2604 (-28993)
PDE10A	MACS_peak_3378 (-37011), MACS_peak_3377 (+42784)
PDE11A	MACS_peak_2059 (+215079)
PDE1A	MACS_peak_2069 (-8679), MACS_peak_2067 (+162727)
PDE4B	MACS_peak_81 (-258428), MACS_peak_82 (-126949), MACS_peak_84 (-50311)
PDE5A	MACS_peak_2726 (-101890)
PDE7A	MACS_peak_3683 (-73718)
PDE8A	MACS_peak_1427 (+165271)
PDGFA	MACS_peak_3397 (+100862), MACS_peak_3396 (+125827), MACS_peak_3395 (+210894)
PDGFRL	MACS_peak_3644 (+26451)
PDHA1	MACS_peak_3940 (+75380)
PDHX	MACS_peak_708 (+28282)
PDIA2	MACS_peak_1473 (+36701)
PDLIM3	MACS_peak_2827 (-106562)
PDPK1	MACS_peak_1476 (+144179)
PEAK1	MACS_peak_1407 (+108143)
PEBP1	MACS_peak_966 (+209208)
PELI2	MACS_peak_1271 (+267880)
PENK	MACS_peak_3671 (-105816), MACS_peak_3670 (-42073)
PFKFB3	MACS_peak_456 (+170736)
PFN2	MACS_peak_2507 (-3611), MACS_peak_2506 (+103356)
PFN4	MACS_peak_1825 (+26181)
PGD	MACS_peak_5 (-4604)
PGRMC2	MACS_peak_2742 (+72974)
PHACTR4	MACS_peak_18 (+16733), MACS_peak_19 (+75399)
PHC2	MACS_peak_26 (-31028)
PHF2	MACS_peak_3859 (+140684), MACS_peak_3860 (+209946)
PHF21B	MACS_peak_2290 (+174687)
PHTF2	MACS_peak_3513 (-33501)
PI15	MACS_peak_3702 (-217543)
PI4K2B	MACS_peak_2587 (-1802)
PIBF1	MACS_peak_1108 (+80756)
PIGK	MACS_peak_120 (+87129)
PIGV	MACS_peak_15 (-89738)
PIP4K2A	MACS_peak_483 (+159431)
PITPNB	MACS_peak_2261 (-8525)
PITX1	MACS_peak_3007 (+51057)
PIWIL3	MACS_peak_2257 (-7229)
PLAC1	MACS_peak_4103 (-60930)
PLAG1	MACS_peak_3669 (+83562)
PLAGL1	MACS_peak_3318 (-76239)
PLBD1	MACS_peak_841 (+95290)
PLCB1	MACS_peak_2156 (-19678)
PLD5	MACS_peak_430 (+41352)
PLEK2	MACS_peak_1289 (+43114)
PLEKHM1	MACS_peak_1598 (-74975)
PLEKHM3	MACS_peak_2105 (-55373)
PLEKHS1	MACS_peak_625 (-1436)
PLGLB1	MACS_peak_1915 (-65196)
PLXNA1	MACS_peak_2476 (+226951)
PMCH	MACS_peak_947 (-103860)
PMS1	MACS_peak_2076 (+133439)
PNO1	MACS_peak_1889 (+81601)
PNPLA4	MACS_peak_3924 (+1277)
POF1B	MACS_peak_4017 (+77878)
POFUT2	MACS_peak_2240 (+70738)
POGK	MACS_peak_263 (-12924)
POLD1	MACS_peak_1800 (+28216)
POLQ	MACS_peak_2468 (+99074)
POLR1A	MACS_peak_1909 (+158299)
POLR1E	MACS_peak_3810 (-11318)
POLR3E	MACS_peak_1494 (+40471)
POM121	MACS_peak_3505 (-31353)
POM121C	MACS_peak_3509 (-141858), MACS_peak_3508 (-104322)
POMGNT1	MACS_peak_38 (-16857)
POMT1	MACS_peak_3913 (-30569)
POMZP3	MACS_peak_3511 (-91712)
POU3F4	MACS_peak_4013 (+36103)
POU4F2	MACS_peak_2775 (+26764)
PPAPDC1A	MACS_peak_636 (-152594), MACS_peak_639 (+159518)
PPCDC	MACS_peak_1403 (+62332)
PPIAL4A	MACS_peak_228 (+148600)
PPIAL4C	MACS_peak_234 (+177574)
PPIF	MACS_peak_557 (+23363)
PPL	MACS_peak_1479 (+9988)
PPM1A	MACS_peak_1277 (+179367)
PPM1B	MACS_peak_1857 (+2080), MACS_peak_1858 (+85278)
PPP1CB	MACS_peak_1833 (+18152)
PPP1R12A	MACS_peak_927 (+196996)
PPP1R1C	MACS_peak_2066 (+69097)
PPP1R3C	MACS_peak_587 (+179584)
PPP1R7	MACS_peak_2145 (+21964)
PPP2R2A	MACS_peak_3650 (+42240)
PPP2R5A	MACS_peak_351 (+83984), MACS_peak_352 (+111743)
PPP3R1	MACS_peak_1889 (+13086)
PPP4R1	MACS_peak_1661 (-62922)
PPP4R1L	MACS_peak_2205 (+34819), MACS_peak_2204 (+52036)
PRB3	MACS_peak_834 (-30029)
PRB4	MACS_peak_834 (+10696)
PRDM1	MACS_peak_3221 (+174058)
PRDM10	MACS_peak_807 (+5701)
PRDM5	MACS_peak_2731 (+41680)
PRELID2	MACS_peak_3019 (+95286)
PREP	MACS_peak_3220 (-14077)
PRKAB2	MACS_peak_224 (+84329), MACS_peak_223 (+163918)
PRKACA	MACS_peak_1764 (+24395)
PRKACB	MACS_peak_142 (+88632)
PRKAR2B	MACS_peak_3560 (+52883)
PRKCA	MACS_peak_1627 (+243337)
PRKCD	MACS_peak_2367 (+52751)
PRKCE	MACS_peak_1859 (+224977)
PRKCQ	MACS_peak_456 (+206633)
PRKD1	MACS_peak_1225 (-161054)
PRMT8	MACS_peak_819 (+35747)
PROCR	MACS_peak_2185 (+29368)
PROX1	MACS_peak_354 (+193630)
PROZ	MACS_peak_1210 (+9122)
PRPF18	MACS_peak_464 (-35315)
PRPF38A	MACS_peak_53 (+130394)
PRPS1	MACS_peak_4051 (+67953)
PRR3	MACS_peak_3124 (-97599)
PRR5	MACS_peak_2288 (-261241), MACS_peak_2289 (-23608)
PRRC2B	MACS_peak_3913 (+42266)
PRRC2C	MACS_peak_278 (-109881), MACS_peak_279 (-84317)
PRRG4	MACS_peak_705 (+162209)
PRSS12	MACS_peak_2720 (+26519)
PRSS23	MACS_peak_751 (-77286), MACS_peak_752 (-56612)
PSD2	MACS_peak_3012 (+137235)
PSG4	MACS_peak_1796 (-40269)
PSG9	MACS_peak_1796 (+23485)
PSIP1	MACS_peak_3790 (-97553)
PSMB1	MACS_peak_3393 (+36431)
PSMD7	MACS_peak_1541 (-169482), MACS_peak_1542 (-132441)
PSME4	MACS_peak_1867 (-144155)
PSMG3	MACS_peak_3398 (-114423)
PTBP2	MACS_peak_172 (-106083), MACS_peak_173 (-51009)
PTCHD1	MACS_peak_3944 (-93416)
PTER	MACS_peak_470 (-126385)
PTGER2	MACS_peak_1259 (+134756)
PTGER3	MACS_peak_105 (-9969)
PTGFR	MACS_peak_126 (-285365)
PTGFRN	MACS_peak_203 (-12534)
PTGS1	MACS_peak_3899 (-93539)
PTK2	MACS_peak_3775 (-50153), MACS_peak_3774 (+102523)
PTN	MACS_peak_3596 (+202847)
PTPN11	MACS_peak_956 (+204364)
PTPN13	MACS_peak_2653 (-182423)
PTPN20B	MACS_peak_511 (-13128)
PTPN3	MACS_peak_3887 (-165843), MACS_peak_3886 (-46804)
PTPN4	MACS_peak_1974 (+31011)
PTPRA	MACS_peak_2153 (+72707)
PTPRG	MACS_peak_2390 (-166464)
PTPRO	MACS_peak_842 (-74045)
PTPRZ1	MACS_peak_3573 (-161615)
PUS7L	MACS_peak_872 (+202458)
QPCT	MACS_peak_1848 (+121432)
R3HDM2	MACS_peak_897 (+83408)
RAB11A	MACS_peak_1371 (-57379)
RAB11FIP1	MACS_peak_3654 (-22132)
RAB22A	MACS_peak_2206 (+78488)
RAB31	MACS_peak_1661 (-30684)
RAB32	MACS_peak_3325 (-167859)
RAB33B	MACS_peak_2757 (-15969)
RAB3IL1	MACS_peak_724 (-20382)
RAB3IP	MACS_peak_913 (+18843)
RAB7A	MACS_peak_2482 (+12440)
RAB9A	MACS_peak_3931 (+37593)
RAB9B	MACS_peak_4046 (-63204)
RABGAP1L	MACS_peak_288 (-77722), MACS_peak_289 (-72212), MACS_peak_291 (+1010), MACS_peak_292 (+103444), MACS_peak_294 (+252860)
RAD21L1	MACS_peak_2148 (+35548)
RAD23B	MACS_peak_3882 (-192422), MACS_peak_3883 (+31696), MACS_peak_3884 (+201107)
RAD54L	MACS_peak_38 (-10570)
RAET1G	MACS_peak_3337 (-3662)
RAI14	MACS_peak_2848 (+2371)
RALBP1	MACS_peak_1659 (-8698)
RALGAPA1	MACS_peak_1235 (+210553)
RALGDS	MACS_peak_3916 (+26216)
RALGPS2	MACS_peak_299 (+9539)
RAMP3	MACS_peak_3476 (+177241)
RAN	MACS_peak_977 (+40226)
RANBP17	MACS_peak_3045 (+226024)
RANBP2	MACS_peak_1957 (-21688)
RAP1GDS1	MACS_peak_2676 (-72838), MACS_peak_2677 (+711)
RAPGEF2	MACS_peak_2797 (+119867)
RAPGEF4	MACS_peak_2043 (+118699)
RAPGEF6	MACS_peak_2994 (-133070)
RARRES2	MACS_peak_3622 (-2918)
RARS	MACS_peak_3040 (-101434)
RASA3	MACS_peak_1212 (+283476)
RASEF	MACS_peak_3839 (+9596)
RASGEF1C	MACS_peak_3065 (-45912), MACS_peak_3064 (+31118)
RASGRF2	MACS_peak_2920 (+70124)
RASL11B	MACS_peak_2599 (+252890)
RASSF6	MACS_peak_2632 (+54902)
RAVER2	MACS_peak_79 (-154678)
RBBP8	MACS_peak_1678 (-121285)
RBKS	MACS_peak_1832 (-286590), MACS_peak_1831 (-61093)
RBM12B	MACS_peak_3730 (+14021), MACS_peak_3729 (+14755)
RBM18	MACS_peak_3899 (-12702)
RBM26	MACS_peak_1137 (+290537)
RBM33	MACS_peak_3629 (+45730)
RBM43	MACS_peak_2009 (+42337)
RBM7	MACS_peak_786 (-97855)
RC3H1	MACS_peak_289 (-65008), MACS_peak_288 (-59498)
RCAN1	MACS_peak_2230 (-46917)
RCBTB2	MACS_peak_1025 (+65668)
RCC1	MACS_peak_18 (-63354), MACS_peak_19 (-4688)
RCOR1	MACS_peak_1323 (+113608)
REEP1	MACS_peak_1911 (-101879)
RELN	MACS_peak_3551 (+166258)
REPIN1	MACS_peak_3622 (-24239)
REPS2	MACS_peak_3936 (+217609)
RER1	MACS_peak_1 (-27829)
RERG	MACS_peak_842 (-26935)
REV3L	MACS_peak_3229 (+209147)
RFK	MACS_peak_3829 (+2313)
RFPL2	MACS_peak_2267 (-16250)
RFX6	MACS_peak_3245 (+106229)
RFX7	MACS_peak_1360 (+116804)
RGMA	MACS_peak_1448 (+110734)
RGPD6	MACS_peak_1962 (+73666)
RGPD8	MACS_peak_1968 (+75619)
RGS1	MACS_peak_324 (-91251)
RGS17	MACS_peak_3343 (-92898)
RGS21	MACS_peak_324 (+167484)
RGS22	MACS_peak_3745 (-4690)
RGS4	MACS_peak_256 (-203822)
RGS9	MACS_peak_1623 (+213569)
RGSL1	MACS_peak_306 (+13162)
RHOBTB2	MACS_peak_3646 (+70851)
RHOH	MACS_peak_2593 (-28634)
RHOJ	MACS_peak_1282 (-83681)
RIMS1	MACS_peak_3173 (-53898)
RIPK2	MACS_peak_3718 (+1623)
RIPPLY3	MACS_peak_2233 (-39332)
RLIM	MACS_peak_3995 (+97807), MACS_peak_3994 (+98473)
RMDN2	MACS_peak_1850 (+112257)
RMND5A	MACS_peak_1914 (-10538)
RNASEH2B	MACS_peak_1033 (+14463), MACS_peak_1034 (+194979)
RNASEL	MACS_peak_306 (+125948)
RNF103	MACS_peak_1914 (-85780)
RNF111	MACS_peak_1363 (-48586)
RNF113B	MACS_peak_1204 (-179892)
RNF13	MACS_peak_2506 (+54983)
RNF130	MACS_peak_3064 (-35113)
RNF133	MACS_peak_3576 (+38558)
RNF138	MACS_peak_1698 (+59144)
RNF144B	MACS_peak_3101 (-29634)
RNF146	MACS_peak_3269 (-35883)
RNF150	MACS_peak_2761 (+50796)
RNF182	MACS_peak_3092 (-105039)
RNF2	MACS_peak_309 (-63083)
RNF213	MACS_peak_1644 (-28277)
RNGTT	MACS_peak_3199 (+182728)
RNLS	MACS_peak_582 (+20518), MACS_peak_580 (+150703), MACS_peak_579 (+175860), MACS_peak_578 (+186515)
ROCK1	MACS_peak_1670 (-38646), MACS_peak_1669 (-23486)
ROS1	MACS_peak_3246 (+50219)
RPH3A	MACS_peak_956 (-168378)
RPH3AL	MACS_peak_1552 (-15619)
RPL30	MACS_peak_3740 (-39932)
RPL31	MACS_peak_1934 (-86047)
RPL35	MACS_peak_3906 (+35349)
RPN1	MACS_peak_2481 (+107079), MACS_peak_2480 (+119524)
RPP21	MACS_peak_3124 (+114156)
RPP40	MACS_peak_3080 (+122902)
RPRD1A	MACS_peak_1721 (+1383), MACS_peak_1720 (+114728)
RPRD1B	MACS_peak_2187 (+67555)
RPS6KA5	MACS_peak_1312 (+104172)
RPS6KA6	MACS_peak_4015 (-190913)
RPTOR	MACS_peak_1645 (+261883)
RRP15	MACS_peak_360 (-272079)
RSPO3	MACS_peak_3269 (+112123)
RSU1	MACS_peak_471 (-235836)
RTKN2	MACS_peak_526 (+95995)
RTP4	MACS_peak_2550 (+43327)
RUFY2	MACS_peak_536 (+33695)
RUFY4	MACS_peak_2120 (+37277)
RUNX2	MACS_peak_3139 (-78798)
RXFP2	MACS_peak_1001 (-103176)
RYBP	MACS_peak_2403 (-267482)
SACM1L	MACS_peak_2355 (+100079)
SAMD1	MACS_peak_1764 (-2641)
SAMD4A	MACS_peak_1267 (-52042)
SAP30L	MACS_peak_3027 (-22561)
SARDH	MACS_peak_3918 (-27253), MACS_peak_3917 (-9257)
SASS6	MACS_peak_175 (+46425)
SAV1	MACS_peak_1256 (-155294)
SBDS	MACS_peak_3499 (+57545)
SBF2	MACS_peak_675 (+213853)
SCAF11	MACS_peak_877 (-257627)
SCAND3	MACS_peak_3122 (-162764), MACS_peak_3121 (-99188), MACS_peak_3119 (-36053)
SCAPER	MACS_peak_1405 (+137491)
SCARA2/MARCO	MACS_peak_1616 (-30045)
SCARF2	MACS_peak_2248 (+38357)
SCEL	MACS_peak_1129 (-205429)
SCFD1	MACS_peak_1227 (+66686)
SCFD2	MACS_peak_2599 (+250895)
SCGB1A1	MACS_peak_727 (-40337)
SCGB1D2	MACS_peak_725 (-24765)
SCGB1D4	MACS_peak_726 (-9074)
SCGB2A1	MACS_peak_725 (+8777)
SCML4	MACS_peak_3224 (-93643)
SCP2D1	MACS_peak_2165 (-210769)
SCRIB	MACS_peak_3778 (+64801)
SCRN3	MACS_peak_2049 (+12784)
SDCCAG8	MACS_peak_433 (+261718)
SDIM1	MACS_peak_3379 (-120948), MACS_peak_3378 (+197157)
SDK1	MACS_peak_3403 (+18395)
SEC14L1	MACS_peak_1640 (-76941)
SEC16B	MACS_peak_297 (+140664)
SEC22A	MACS_peak_2470 (+58906)
SEC61G	MACS_peak_3485 (-213098)
SEC63	MACS_peak_3224 (+40234)
SEL1L	MACS_peak_1305 (-8959)
SEL1L2	MACS_peak_2163 (+97961)
SEMA4C	MACS_peak_1927 (-105831), MACS_peak_1926 (-104549)
SEMA6B	MACS_peak_1757 (-53668)
SEPP1	MACS_peak_2852 (-121809), MACS_peak_2851 (-52889)
SEPTIN4	MACS_peak_1606 (-90665)
SEPTIN5	MACS_peak_2245 (-65203), MACS_peak_2246 (-31004)
SERAC1	MACS_peak_3359 (+62695)
SERINC5	MACS_peak_2917 (+14231)
SERPINA12	MACS_peak_1316 (-36753)
SERPINA4	MACS_peak_1316 (-6494)
SERTAD2	MACS_peak_1885 (-39406)
SESN3	MACS_peak_766 (-118340)
SETD6	MACS_peak_1527 (+2989)
SF3B5	MACS_peak_3319 (-40693), MACS_peak_3318 (+50400)
SFMBT2	MACS_peak_457 (+280603)
SFSWAP	MACS_peak_978 (+79974)
SGK1	MACS_peak_3292 (+114609)
SGSM1	MACS_peak_2257 (-24374)
SH2D1A	MACS_peak_4084 (-234216)
SH2D1B	MACS_peak_255 (-15540)
SH3BGR	MACS_peak_2239 (-4425)
SH3GL2	MACS_peak_3791 (+66231)
SH3GLB1	MACS_peak_149 (-98631)
SH3PXD2B	MACS_peak_3047 (-66977)
SHANK2	MACS_peak_734 (-79911)
SHH	MACS_peak_3629 (+121864)
SHOC2	MACS_peak_619 (+13245)
SHOX2	MACS_peak_2522 (+97254)
SHQ1	MACS_peak_2403 (+134080)
SIDT1	MACS_peak_2460 (+113063)
SIGIRR	MACS_peak_661 (-10455)
SIGLEC12	MACS_peak_1803 (-22473)
SIGLEC6	MACS_peak_1803 (+7541)
SIMC1	MACS_peak_3055 (+12620)
SIPA1L3	MACS_peak_1787 (-67628)
SIRPB2	MACS_peak_2149 (-6114)
SIRPD	MACS_peak_2149 (+61333)
SIVA1	MACS_peak_1330 (+13328)
SKA1	MACS_peak_1742 (-6052)
SKI	MACS_peak_1 (+135309)
SKP1	MACS_peak_3006 (+16284)
SLAIN1	MACS_peak_1132 (+11241)
SLAMF1	MACS_peak_250 (-22201)
SLC10A7	MACS_peak_2773 (+169844)
SLC12A2	MACS_peak_2985 (+13643)
SLC13A1	MACS_peak_3579 (-290098), MACS_peak_3578 (-249246), MACS_peak_3577 (+151868)
SLC13A5	MACS_peak_1558 (-1045)
SLC14A2	MACS_peak_1735 (-129419)
SLC16A12	MACS_peak_583 (+88795)
SLC16A2	MACS_peak_3994 (+94683), MACS_peak_3995 (+95349)
SLC16A6	MACS_peak_1631 (-121013)
SLC19A1	MACS_peak_2241 (+23083)
SLC1A4	MACS_peak_1885 (-296082)
SLC22A1	MACS_peak_3367 (+31723)
SLC22A2	MACS_peak_3367 (+105504)
SLC22A6	MACS_peak_728 (+39196)
SLC22A9	MACS_peak_730 (+105779)
SLC25A15	MACS_peak_1014 (+73052)
SLC25A21	MACS_peak_1239 (-17121)
SLC25A26	MACS_peak_2395 (+174656)
SLC25A4	MACS_peak_2825 (-103159)
SLC25A40	MACS_peak_3526 (-44362)
SLC25A52	MACS_peak_1696 (-136202)
SLC26A11	MACS_peak_1644 (+12161)
SLC26A7	MACS_peak_3720 (-53551)
SLC27A6	MACS_peak_2990 (+92333)
SLC29A3	MACS_peak_540 (-7261)
SLC2A1	MACS_peak_34 (-159616)
SLC2A12	MACS_peak_3292 (-150813)
SLC30A6	MACS_peak_1837 (+71125)
SLC33A1	MACS_peak_2520 (+11317)
SLC35B4	MACS_peak_3590 (+3369)
SLC35D1	MACS_peak_88 (+17330)
SLC35F1	MACS_peak_3247 (-165097), MACS_peak_3250 (-75724)
SLC38A1	MACS_peak_877 (+20820)
SLC38A2	MACS_peak_881 (-211403), MACS_peak_880 (-171006)
SLC38A4	MACS_peak_881 (+241727), MACS_peak_880 (+282124)
SLC39A8	MACS_peak_2689 (-134940), MACS_peak_2688 (-33545), MACS_peak_2687 (+224082)
SLC39A9	MACS_peak_1293 (+40920)
SLC3A1	MACS_peak_1857 (-104503), MACS_peak_1858 (-21305)
SLC41A2	MACS_peak_949 (+156197)
SLC46A2	MACS_peak_3893 (+88806)
SLC46A3	MACS_peak_995 (-112378)
SLC4A3	MACS_peak_2121 (+209387)
SLC4A9	MACS_peak_3013 (+19130)
SLC5A11	MACS_peak_1496 (-71810)
SLC5A4	MACS_peak_2267 (+35614)
SLC5A9	MACS_peak_44 (-70487)
SLC6A11	MACS_peak_2310 (-177595)
SLC6A12	MACS_peak_811 (-33667)
SLC6A13	MACS_peak_813 (-111693), MACS_peak_811 (+14646)
SLC6A14	MACS_peak_4065 (-132118), MACS_peak_4066 (-38267)
SLC6A16	MACS_peak_1799 (+55666)
SLC6A18	MACS_peak_2830 (+10643)
SLC6A20	MACS_peak_2356 (-8983), MACS_peak_2355 (+7194)
SLC6A4	MACS_peak_1584 (+87312)
SLC9A6	MACS_peak_4108 (+43302)
SLC9C1	MACS_peak_2456 (+28497)
SLIT2	MACS_peak_2580 (-111089)
SLIT3	MACS_peak_3041 (+142121)
SLITRK4	MACS_peak_4117 (-127080)
SLITRK6	MACS_peak_1159 (-219614), MACS_peak_1156 (+13761)
SLK	MACS_peak_608 (-42388)
SLMO1	MACS_peak_1664 (+134409)
SLN	MACS_peak_778 (+25651)
SLTM	MACS_peak_1363 (-5713)
SMAD1	MACS_peak_2770 (-58534)
SMAD3	MACS_peak_1373 (-194864), MACS_peak_1374 (-147686)
SMAD6	MACS_peak_1373 (+168753), MACS_peak_1374 (+215931)
SMAD7	MACS_peak_1739 (-87939)
SMAP1	MACS_peak_3169 (+204795)
SMARCA2	MACS_peak_3779 (+290229)
SMARCC1	MACS_peak_2359 (+25146)
SMCO4	MACS_peak_759 (+181721)
SMG1	MACS_peak_1491 (+101196)
SMIM9	MACS_peak_4129 (-36138)
SMNDC1	MACS_peak_617 (-144335)
SMS	MACS_peak_3943 (-30575)
SMURF2	MACS_peak_1620 (-250825)
SMYD2	MACS_peak_354 (-99660)
SMYD3	MACS_peak_444 (+116114)
SNCAIP	MACS_peak_2973 (-105587), MACS_peak_2974 (-71132)
SNED1	MACS_peak_2143 (-28433), MACS_peak_2144 (+5499)
SNPH	MACS_peak_2148 (-4648)
SNRK	MACS_peak_2352 (+49487), MACS_peak_2353 (+66386)
SNRPA1	MACS_peak_1469 (+5622)
SNRPD1	MACS_peak_1671 (+78361)
SNRPE	MACS_peak_342 (+105155)
SNX13	MACS_peak_3425 (+84057)
SNX30	MACS_peak_3893 (+51269)
SNX6	MACS_peak_1234 (-30761)
SNX9	MACS_peak_3358 (+95269)
SOX13	MACS_peak_342 (-106834)
SOX2	MACS_peak_2548 (+118781)
SOX4	MACS_peak_3105 (-15056)
SPAG6	MACS_peak_480 (+61648), MACS_peak_483 (+209654)
SPANXC	MACS_peak_4115 (+22609)
SPATA17	MACS_peak_359 (+35738)
SPATA18	MACS_peak_2597 (+131161)
SPATA8	MACS_peak_1458 (+157916)
SPDYA	MACS_peak_1833 (-40846)
SPECC1	MACS_peak_1573 (-73588)
SPESP1	MACS_peak_1384 (+24564)
SPHKAP	MACS_peak_2131 (-3691)
SPIB	MACS_peak_1800 (-6383)
SPIN4	MACS_peak_3976 (+255530)
SPINK8	MACS_peak_2360 (-33837)
SPIRE1	MACS_peak_1664 (+115829)
SPOCK2	MACS_peak_543 (-95489), MACS_peak_542 (-8300), MACS_peak_541 (-7721)
SPOCK3	MACS_peak_2804 (-193802)
SPRY2	MACS_peak_1141 (-40402)
SPRY4	MACS_peak_3017 (-295042)
SPRYD7	MACS_peak_1030 (+82625)
SPTSSA	MACS_peak_1232 (+71401)
SREK1	MACS_peak_2891 (-54571)
SRPK2	MACS_peak_3555 (+28532)
SRSF11	MACS_peak_103 (+61843)
SRSF7	MACS_peak_1851 (+48876)
SS18L2	MACS_peak_2350 (-6519)
SSH2	MACS_peak_1583 (+32905), MACS_peak_1582 (+131416)
SST	MACS_peak_2550 (+258740)
ST3GAL5	MACS_peak_1909 (-58842)
ST6GALNAC5	MACS_peak_116 (+21015), MACS_peak_120 (+264856)
ST7	MACS_peak_3570 (-57153)
ST8SIA1	MACS_peak_852 (-49985), MACS_peak_851 (-33420)
STAC3	MACS_peak_897 (-96404)
STAG1	MACS_peak_2488 (+269292)
STAG2	MACS_peak_4084 (+151609)
STAP1	MACS_peak_2621 (+52379), MACS_peak_2622 (+95975)
STAT1	MACS_peak_2081 (+90848)
STAU2	MACS_peak_3701 (+21884)
STEAP1B	MACS_peak_3432 (-23469)
STEAP3	MACS_peak_1972 (+48740)
STH	MACS_peak_1599 (+83663)
STK17A	MACS_peak_3473 (-3226)
STK24	MACS_peak_1204 (+164841)
STK3	MACS_peak_3742 (+68789)
STK31	MACS_peak_3436 (+56838), MACS_peak_3437 (+100195)
STK32C	MACS_peak_658 (-6535)
STMN2	MACS_peak_3707 (+132729)
STMND1	MACS_peak_3095 (-188379), MACS_peak_3096 (-185052), MACS_peak_3097 (-39965), MACS_peak_3098 (-26585)
STRIP2	MACS_peak_3584 (-110061)
STRN	MACS_peak_1844 (+135459)
STX11	MACS_peak_3319 (-14216)
STX6	MACS_peak_304 (+152040), MACS_peak_303 (+279817)
SUCLG2	MACS_peak_2398 (-66335)
SUDS3	MACS_peak_967 (+192654)
SULT6B1	MACS_peak_1845 (+28589)
SUPT3H	MACS_peak_3141 (-295476)
SUPT7L	MACS_peak_1829 (-86113)
SUV39H2	MACS_peak_466 (+28885)
SUZ12	MACS_peak_1588 (+76378)
SV2B	MACS_peak_1445 (-21891)
SWAP70	MACS_peak_673 (+1862), MACS_peak_674 (+272835)
SWT1	MACS_peak_311 (+41805), MACS_peak_312 (+104160)
SYAP1	MACS_peak_3934 (+52040)
SYCE1L	MACS_peak_1544 (+207408)
SYN3	MACS_peak_2269 (+131605)
SYNDIG1	MACS_peak_2171 (-296983)
SYNJ2	MACS_peak_3358 (-63354), MACS_peak_3359 (+123688)
SYNPO2	MACS_peak_2723 (+1479)
SYNPR	MACS_peak_2392 (-139773)
T	MACS_peak_3379 (+151434)
TACC2	MACS_peak_642 (+77436)
TAF1A	MACS_peak_371 (-20373)
TAF1B	MACS_peak_1811 (-108872), MACS_peak_1813 (+44362)
TAF4B	MACS_peak_1684 (+217455)
TANC2	MACS_peak_1616 (-171177)
TAOK3	MACS_peak_966 (+27879)
TAS2R16	MACS_peak_3577 (-52418)
TASP1	MACS_peak_2162 (+43482)
TAX1BP1	MACS_peak_3449 (+3086)
TBC1D20	MACS_peak_2146 (-57694)
TBC1D32	MACS_peak_3260 (+261012)
TBC1D4	MACS_peak_1119 (+275217)
TBC1D5	MACS_peak_2318 (-159442)
TBCA	MACS_peak_2908 (-20303), MACS_peak_2907 (+79753)
TBCK	MACS_peak_2700 (-77740)
TBL1X	MACS_peak_3925 (+246114)
TBL1XR1	MACS_peak_2542 (+152799)
TBX1	MACS_peak_2247 (+78141)
TBX20	MACS_peak_3463 (+180645)
TBXAS1	MACS_peak_3599 (-1816)
TCEAL2	MACS_peak_4038 (-36479), MACS_peak_4039 (-36048)
TCF7	MACS_peak_3006 (+46043)
TCHP	MACS_peak_953 (+75042)
TCP11	MACS_peak_3131 (+36376)
TDP1	MACS_peak_1308 (+99919)
TEAD1	MACS_peak_681 (-132696), MACS_peak_682 (+207229)
TECPR2	MACS_peak_1322 (+38125)
TEK	MACS_peak_3801 (+132319)
TENM1	MACS_peak_4085 (+110276)
TENM3	MACS_peak_2820 (+71266)
TENM4	MACS_peak_746 (-113981)
TERT	MACS_peak_2830 (+59049)
TES	MACS_peak_3568 (+136059), MACS_peak_3569 (+162921)
TEX10	MACS_peak_3875 (+230106)
TEX14	MACS_peak_1606 (+60540)
TFAP2B	MACS_peak_3152 (+94817)
TFAP2D	MACS_peak_3151 (-237919)
TFB1M	MACS_peak_3348 (-32395), MACS_peak_3347 (-24795)
TFEC	MACS_peak_3567 (+32222)
TFRC	MACS_peak_2554 (+42361)
TGM2	MACS_peak_2187 (+64271)
TGM3	MACS_peak_2150 (+47943), MACS_peak_2151 (+60561)
TGM6	MACS_peak_2150 (-36964), MACS_peak_2151 (-24346)
TH	MACS_peak_663 (-58085)
THADA	MACS_peak_1855 (+18631)
THAP1	MACS_peak_3660 (+2895)
THBS1	MACS_peak_1347 (+230205)
THBS2	MACS_peak_3389 (+119659)
THBS4	MACS_peak_2917 (+206496)
THOC1	MACS_peak_1648 (+59052)
THRB	MACS_peak_2326 (+30182)
THSD7A	MACS_peak_3416 (-87956)
TIFAB	MACS_peak_3008 (-67149)
TIMELESS	MACS_peak_896 (+54309), MACS_peak_895 (+56835)
TIMP3	MACS_peak_2269 (+125066)
TKT	MACS_peak_2367 (+42151)
TLE3	MACS_peak_1388 (+224200)
TLK1	MACS_peak_2040 (+17016)
TLX3	MACS_peak_3045 (-221390)
TMC3	MACS_peak_1415 (-55996)
TMED5	MACS_peak_165 (-104271)
TMEM100	MACS_peak_1604 (+179494)
TMEM106B	MACS_peak_3416 (-291146)
TMEM116	MACS_peak_955 (+105167)
TMEM123	MACS_peak_775 (+79821)
TMEM126A	MACS_peak_750 (-6627)
TMEM126B	MACS_peak_750 (+12776)
TMEM130	MACS_peak_3545 (+199197)
TMEM132B	MACS_peak_972 (+41104)
TMEM140	MACS_peak_3592 (-27492)
TMEM150C	MACS_peak_2648 (-201966)
TMEM168	MACS_peak_3565 (+62683)
TMEM171	MACS_peak_2899 (-74419)
TMEM174	MACS_peak_2901 (+157676)
TMEM176B	MACS_peak_3624 (-5429)
TMEM178A	MACS_peak_1852 (-209097)
TMEM179	MACS_peak_1329 (-10805)
TMEM185B	MACS_peak_1975 (+173734)
TMEM200A	MACS_peak_3281 (+40511)
TMEM206	MACS_peak_352 (+17621), MACS_peak_351 (+45380)
TMEM233	MACS_peak_968 (-57067)
TMEM243	MACS_peak_3524 (-85877)
TMEM247	MACS_peak_1861 (-63106)
TMEM248	MACS_peak_3499 (+16831)
TMEM260	MACS_peak_1271 (-193538)
TMEM45A	MACS_peak_2436 (+53142)
TMEM45B	MACS_peak_806 (+29938)
TMEM53	MACS_peak_35 (-56392)
TMEM60	MACS_peak_3513 (-8049)
TMEM63B	MACS_peak_3138 (-166045)
TMPRSS5	MACS_peak_785 (+39604)
TMSB15B	MACS_peak_4046 (-66880)
TMX4	MACS_peak_2156 (-93118)
TNFAIP6	MACS_peak_2011 (-39389)
TNFAIP8L1	MACS_peak_1757 (-26541)
TNFRSF10B	MACS_peak_3646 (+10911)
TNFRSF21	MACS_peak_3143 (+174827)
TNFSF9	MACS_peak_1758 (+40338)
TNK2	MACS_peak_2554 (-144267)
TNRC6A	MACS_peak_1496 (+44318)
TNRC6B	MACS_peak_2281 (+1737)
TNRC6C	MACS_peak_1642 (-271991)
TNS3	MACS_peak_3479 (+267958)
TOMM20	MACS_peak_404 (+206749)
TOP1	MACS_peak_2189 (-51427)
TOP3B	MACS_peak_2250 (-207259)
TP53AIP1	MACS_peak_802 (-215373)
TP53I3	MACS_peak_1825 (-12115)
TPD52L1	MACS_peak_3265 (+129099)
TPD52L3	MACS_peak_3784 (+56950)
TPPP	MACS_peak_2829 (+77818)
TPST1	MACS_peak_3495 (+85543), MACS_peak_3496 (+93361)
TRA2A	MACS_peak_3435 (+57171)
TRABD2B	MACS_peak_44 (-155305)
TRAF3	MACS_peak_1323 (-71207)
TRAF3IP1	MACS_peak_2136 (+63469)
TRAPPC11	MACS_peak_2821 (-61872)
TRAPPC2	MACS_peak_3931 (+7857)
TRAPPC8	MACS_peak_1696 (+46018)
TRIM16	MACS_peak_1566 (-9596)
TRIM16L	MACS_peak_1571 (-10046)
TRIM2	MACS_peak_2788 (+20413)
TRIM27	MACS_peak_3122 (+173890), MACS_peak_3121 (+237466)
TRIM29	MACS_peak_789 (-19940)
TRIM33	MACS_peak_198 (+31384)
TRIP12	MACS_peak_2132 (+150191)
TRIQK	MACS_peak_3723 (+108432)
TRPM4	MACS_peak_1799 (+111818)
TRUB1	MACS_peak_627 (-122659), MACS_peak_628 (+44987)
TSC22D3	MACS_peak_4051 (+79327)
TSHR	MACS_peak_1304 (-3334)
TSN	MACS_peak_1978 (+227747)
TSNAX	MACS_peak_399 (+12401)
TSPAN17	MACS_peak_3056 (+109475)
TSPAN18	MACS_peak_717 (-120333)
TSPAN2	MACS_peak_201 (-156016)
TSPAN3	MACS_peak_1407 (-240773)
TSPYL5	MACS_peak_3739 (-90435)
TTBK2	MACS_peak_1349 (+36708)
TTC14	MACS_peak_2545 (-161956)
TTC23L	MACS_peak_2848 (-152239)
TTC27	MACS_peak_1838 (-170754), MACS_peak_1839 (+288378)
TTC28	MACS_peak_2265 (+14557)
TTC30A	MACS_peak_2059 (-238709)
TTC30B	MACS_peak_2055 (+124740)
TTC7B	MACS_peak_1312 (-140019), MACS_peak_1311 (+68303), MACS_peak_1310 (+181953)
TTC8	MACS_peak_1307 (+890)
TTLL7	MACS_peak_141 (+24993), MACS_peak_139 (+115858)
TTLL8	MACS_peak_2301 (+37119)
TTR	MACS_peak_1694 (+69155)
TUBGCP3	MACS_peak_1209 (-7647)
TWIST2	MACS_peak_2139 (+123386)
TWSG1	MACS_peak_1659 (+131544)
TXLNG	MACS_peak_3934 (-14755)
TXNDC16	MACS_peak_1259 (+103355)
TXNIP	MACS_peak_220 (-1296)
TXNRD3	MACS_peak_2474 (-35307), MACS_peak_2473 (+65219)
U2SURP	MACS_peak_2501 (-24562)
UACA	MACS_peak_1389 (+169616)
UBA6	MACS_peak_2622 (+46476), MACS_peak_2621 (+90072)
UBE2D3	MACS_peak_2690 (+83118)
UBE2E3	MACS_peak_2065 (+76480)
UBE2NL	MACS_peak_4117 (-117774)
UBE2V2	MACS_peak_3664 (+11974)
UBE3C	MACS_peak_3633 (-35116)
UBN1	MACS_peak_1479 (+74932)
UBP1	MACS_peak_2336 (-83094)
UBQLN1	MACS_peak_3840 (-25751)
UBXN2B	MACS_peak_3672 (-15683)
UGT1A1	MACS_peak_2134 (+46397)
UHMK1	MACS_peak_255 (-70177)
UHRF2	MACS_peak_3784 (-28024)
ULBP2	MACS_peak_3337 (-15260)
ULK4	MACS_peak_2346 (+101678)
UNC13A	MACS_peak_1769 (+66109)
UNC13B	MACS_peak_3808 (+41037)
UNC50	MACS_peak_1929 (+85543)
UNC5A	MACS_peak_3056 (-53615)
UNC5B	MACS_peak_540 (+99427)
UNC93B1	MACS_peak_732 (+177675)
UPF1	MACS_peak_1770 (-4642)
UQCRFS1	MACS_peak_1774 (+288034)
URB1	MACS_peak_2226 (+65060)
URB2	MACS_peak_389 (+110321), MACS_peak_390 (+216881)
URI1	MACS_peak_1777 (+50078)
UROD	MACS_peak_36 (+112494)
USP12	MACS_peak_993 (+243060)
USP14	MACS_peak_1648 (+50367)
USP24	MACS_peak_56 (+31453)
USP25	MACS_peak_2214 (+223706)
USP32	MACS_peak_1610 (-80926)
USP33	MACS_peak_123 (+1650)
USP35	MACS_peak_744 (+71834)
USP43	MACS_peak_1560 (-27561)
USP44	MACS_peak_941 (+1982)
USP53	MACS_peak_2725 (-39280)
UVRAG	MACS_peak_741 (+81943)
UXS1	MACS_peak_1952 (+106208)
VAC14	MACS_peak_1533 (-169172)
VANGL2	MACS_peak_248 (-12021)
VAPA	MACS_peak_1662 (+212543)
VAPB	MACS_peak_2206 (-938)
VASH1	MACS_peak_1302 (-240465)
VASH2	MACS_peak_353 (-48332)
VAV2	MACS_peak_3918 (+225137), MACS_peak_3917 (+243133)
VCAM1	MACS_peak_176 (-117566)
VCX	MACS_peak_3924 (+83904)
VEGFA	MACS_peak_3137 (-39895), MACS_peak_3138 (+190162)
VGLL2	MACS_peak_3245 (-282085), MACS_peak_3246 (+110062)
VIMP	MACS_peak_1469 (-12179)
VIPR1	MACS_peak_2350 (+72698)
VIT	MACS_peak_1844 (+134323)
VKORC1L1	MACS_peak_3494 (+60407)
VMA21	MACS_peak_4124 (-64907)
VPREB1	MACS_peak_2250 (-54681)
VPS13D	MACS_peak_8 (+157844)
VPS33B	MACS_peak_1445 (-55791)
VPS45	MACS_peak_236 (-36919)
VRK2	MACS_peak_1874 (+116505)
VSIG1	MACS_peak_4052 (-54825)
[truncated: 117 more rows]
